# Supplementary material for: The current landscape of coronavirus-host protein–protein interactions
Source: J Transl Med. 2020 Aug 18;18:319. doi: 10.1186/s12967-020-02480-z (PMC7432461; doi:10.1186/s12967-020-02480-z)
Supplement: Supplementary file 1 — Additional file 1. Table S1: Complete list of coronavirus-host interaction data retrieved from literature. Table S2: Consolidated, non-redundant list of coronavirus-host protein-protein interactions. Table S3: Number of interactions identified for each coronavirus. Table S4: List of interactions reported multiple times accross different coronaviruses (i.e. orthologous interactions). Table S5: Matrix of host proteins interacting with multiple coronaviruses. Table S6: Host proteins present in enriched KEGG pathways from Table 1c. Table S7: Consolidated, non-redundant list of host proteins present in Table S1 with or without interactors of S (left and right columns, respectively). [file 12967_2020_2480_MOESM1_ESM.xlsx]

## Sheet: Table S1
VIRUS	VIRAL PROTEIN	CELLULAR PROTEIN (Uniprot)	SPECIES	METHOD	MI ID	PUBLICATION (PUBMED ID)
MHV	NSP10	SDCBP	Mouse	two hybrid	MI:0018	25720483
MHV	NSP7	SGTA	Mouse	two hybrid	MI:0018	25720483
MHV	NSP14	HOMER3	Mouse	two hybrid	MI:0018	25720483
MHV	NSP16	RILPL1	Mouse	two hybrid	MI:0018	25720483
MHV	NSP8	PRKAR1B	Mouse	two hybrid	MI:0018	25720483
MHV	NSP5	DZANK1	Mouse	two hybrid	MI:0018	25720483
MHV	NSP16	RAB3IP	Mouse	two hybrid	MI:0018	25720483
MHV	NSP2	MARK2	Mouse	two hybrid	MI:0018	25720483
MHV	NSP3	TXN	Mouse	two hybrid	MI:0018	25720483
MHV	NSP2	MARK1	Mouse	two hybrid	MI:0018	25720483
MHV	NSP7	PIAS1	Mouse	two hybrid	MI:0018	25720483
MHV	NSP16	PNMA2	Mouse	two hybrid	MI:0018	25720483
MHV	NSP15	GANAB	Mouse	two hybrid	MI:0018	25720483
MHV	NSP14	FBF1	Mouse	two hybrid	MI:0018	25720483
MHV	NSP5	DDIT4L	Mouse	two hybrid	MI:0018	25720483
MHV	NSP16	MPRIP	Mouse	two hybrid	MI:0018	25720483
MHV	NSP5	MAGI3	Mouse	two hybrid	MI:0018	25720483
MHV	NSP2	MARK3	Mouse	two hybrid	MI:0018	25720483
MHV	NSP14	MPRIP	Mouse	two hybrid	MI:0018	25720483
MHV	NSP9	ADK	Mouse	two hybrid	MI:0018	25720483
MHV	NSP16	FBF1	Mouse	two hybrid	MI:0018	25720483
MHV	NSP5	MTMR3	Mouse	two hybrid	MI:0018	25720483
MHV	NSP9	HTRA2	Mouse	two hybrid	MI:0018	25720483
MHV	NSP14	FAM184A	Mouse	two hybrid	MI:0018	25720483
MHV	NSP2	CEP85	Mouse	two hybrid	MI:0018	25720483
MHV	NSP3	UBC	Mouse	two hybrid	MI:0018	25720483
MHV	NSP3	KIFC3	Mouse	two hybrid	MI:0018	25720483
MHV	NSP5	CGRRF1	Mouse	two hybrid	MI:0018	25720483
MHV	NSP5	APBA3	Mouse	two hybrid	MI:0018	25720483
MHV	NSP9	RUFY1	Mouse	two hybrid	MI:0018	25720483
MHV	NSP14	PDE4DIP	Mouse	two hybrid	MI:0018	25720483
MHV	NSP5	KLHL8	Mouse	two hybrid	MI:0018	25720483
MHV	NSP3	AGAP3	Mouse	two hybrid	MI:0018	25720483
MHV	NSP16	USP28	Mouse	two hybrid	MI:0018	25720483
MHV	NSP14	TRIM46	Mouse	two hybrid	MI:0018	25720483
MHV	NSP3	MT-CO1	Mouse	two hybrid	MI:0018	25720483
MHV	NSP14	MON2	Mouse	two hybrid	MI:0018	25720483
MHV	NSP7	HEATR6	Mouse	two hybrid	MI:0018	25720483
MHV	NSP14	DZIP1	Mouse	two hybrid	MI:0018	25720483
SARS-CoV	NSP13	THAP11	Rat	two hybrid	MI:0018	19224332
SARS-CoV	NSP13	SMARCB1	Rat	two hybrid	MI:0018	19224332
SARS-CoV	NSP13	DDX5	Rat	two hybrid	MI:0018	19224332
SARS-CoV	NSP13	BCAS2	Rat	two hybrid	MI:0018	19224332
SARS-CoV	NSP13	ADA	Rat	two hybrid	MI:0018	19224332
SARS-CoV	NSP13	DARS2	Rat	two hybrid	MI:0018	19224332
SARS-CoV	NSP13	ACTN2	Rat	two hybrid	MI:0018	19224332
SARS-CoV	NSP13	DDX5	Rat	validated two hybrid	MI:1356	19224332
SARS-CoV	NSP13	DDX5	Rat	anti tag coimmunoprecipitation	MI:0007	19224332
SARS-CoV	NSP10	MT-ND4L	Human	two hybrid	MI:0018	16157265
SARS-CoV	NSP10	MT-CO2	Human	two hybrid	MI:0018	16157265
SARS-CoV	NSP10	ATF5	Human	two hybrid	MI:0018	16157265
SARS-CoV	NSP10	BTF3	Human	two hybrid	MI:0018	16157265
SARS-CoV	NSP10	MT-ND4L	Human	validated two hybrid	MI:1356	16157265
SARS-CoV	NSP10	MT-CO2	Human	validated two hybrid	MI:1356	16157265
SARS-CoV	NSP10	ATF5	Human	validated two hybrid	MI:1356	16157265
SARS-CoV	NSP10	BTF3	Human	validated two hybrid	MI:1356	16157265
SARS-CoV-2	E	AP3B1	Human	mass spectrometry studies of complexes	MI:0069	32353859
SARS-CoV-2	E	BRD4	Human	mass spectrometry studies of complexes	MI:0069	32353859
SARS-CoV-2	E	BRD2	Human	mass spectrometry studies of complexes	MI:0069	32353859
SARS-CoV-2	E	CWC27	Human	mass spectrometry studies of complexes	MI:0069	32353859
SARS-CoV-2	E	ZC3H18	Human	mass spectrometry studies of complexes	MI:0069	32353859
SARS-CoV-2	E	SLC44A2	Human	mass spectrometry studies of complexes	MI:0069	32353859
SARS-CoV-2	M	PMPCB	Human	mass spectrometry studies of complexes	MI:0069	32353859
SARS-CoV-2	M	YIF1A	Human	mass spectrometry studies of complexes	MI:0069	32353859
SARS-CoV-2	M	ATP1B1	Human	mass spectrometry studies of complexes	MI:0069	32353859
SARS-CoV-2	M	ACADM	Human	mass spectrometry studies of complexes	MI:0069	32353859
SARS-CoV-2	M	ETFA	Human	mass spectrometry studies of complexes	MI:0069	32353859
SARS-CoV-2	M	STOM	Human	mass spectrometry studies of complexes	MI:0069	32353859
SARS-CoV-2	M	GGCX	Human	mass spectrometry studies of complexes	MI:0069	32353859
SARS-CoV-2	M	ATP6V1A	Human	mass spectrometry studies of complexes	MI:0069	32353859
SARS-CoV-2	M	PSMD8	Human	mass spectrometry studies of complexes	MI:0069	32353859
SARS-CoV-2	M	REEP5	Human	mass spectrometry studies of complexes	MI:0069	32353859
SARS-CoV-2	M	PMPCA	Human	mass spectrometry studies of complexes	MI:0069	32353859
SARS-CoV-2	M	ANO6	Human	mass spectrometry studies of complexes	MI:0069	32353859
SARS-CoV-2	M	PITRM1	Human	mass spectrometry studies of complexes	MI:0069	32353859
SARS-CoV-2	M	SLC30A9	Human	mass spectrometry studies of complexes	MI:0069	32353859
SARS-CoV-2	M	FASTKD5	Human	mass spectrometry studies of complexes	MI:0069	32353859
SARS-CoV-2	M	SLC30A7	Human	mass spectrometry studies of complexes	MI:0069	32353859
SARS-CoV-2	M	TUBGCP3	Human	mass spectrometry studies of complexes	MI:0069	32353859
SARS-CoV-2	M	COQ8B	Human	mass spectrometry studies of complexes	MI:0069	32353859
SARS-CoV-2	M	SAAL1	Human	mass spectrometry studies of complexes	MI:0069	32353859
SARS-CoV-2	M	REEP6	Human	mass spectrometry studies of complexes	MI:0069	32353859
SARS-CoV-2	M	INTS4	Human	mass spectrometry studies of complexes	MI:0069	32353859
SARS-CoV-2	M	SLC25A21	Human	mass spectrometry studies of complexes	MI:0069	32353859
SARS-CoV-2	M	TUBGCP2	Human	mass spectrometry studies of complexes	MI:0069	32353859
SARS-CoV-2	M	TARS2	Human	mass spectrometry studies of complexes	MI:0069	32353859
SARS-CoV-2	M	RTN4	Human	mass spectrometry studies of complexes	MI:0069	32353859
SARS-CoV-2	M	FAM8A1	Human	mass spectrometry studies of complexes	MI:0069	32353859
SARS-CoV-2	M	AASS	Human	mass spectrometry studies of complexes	MI:0069	32353859
SARS-CoV-2	M	AKAP8L	Human	mass spectrometry studies of complexes	MI:0069	32353859
SARS-CoV-2	M	AAR2	Human	mass spectrometry studies of complexes	MI:0069	32353859
SARS-CoV-2	M	BZW2	Human	mass spectrometry studies of complexes	MI:0069	32353859
SARS-CoV-2	N	RRP9	Human	mass spectrometry studies of complexes	MI:0069	32353859
SARS-CoV-2	N	PABPC1	Human	mass spectrometry studies of complexes	MI:0069	32353859
SARS-CoV-2	N	CSNK2A2	Human	mass spectrometry studies of complexes	MI:0069	32353859
SARS-CoV-2	N	CSNK2B	Human	mass spectrometry studies of complexes	MI:0069	32353859
SARS-CoV-2	N	G3BP1	Human	mass spectrometry studies of complexes	MI:0069	32353859
SARS-CoV-2	N	PABPC4	Human	mass spectrometry studies of complexes	MI:0069	32353859
SARS-CoV-2	N	LARP1	Human	mass spectrometry studies of complexes	MI:0069	32353859
SARS-CoV-2	N	FAM98A	Human	mass spectrometry studies of complexes	MI:0069	32353859
SARS-CoV-2	N	SNIP1	Human	mass spectrometry studies of complexes	MI:0069	32353859
SARS-CoV-2	N	UPF1	Human	mass spectrometry studies of complexes	MI:0069	32353859
SARS-CoV-2	N	MOV10	Human	mass spectrometry studies of complexes	MI:0069	32353859
SARS-CoV-2	N	G3BP2	Human	mass spectrometry studies of complexes	MI:0069	32353859
SARS-CoV-2	N	DDX21	Human	mass spectrometry studies of complexes	MI:0069	32353859
SARS-CoV-2	N	RBM28	Human	mass spectrometry studies of complexes	MI:0069	32353859
SARS-CoV-2	N	RPL36	Human	mass spectrometry studies of complexes	MI:0069	32353859
SARS-CoV-2	S	GOLGA7	Human	mass spectrometry studies of complexes	MI:0069	32353859
SARS-CoV-2	S	ZDHHC5	Human	mass spectrometry studies of complexes	MI:0069	32353859
SARS-CoV-2	NSP1	POLA1	Human	mass spectrometry studies of complexes	MI:0069	32353859
SARS-CoV-2	NSP1	PRIM1	Human	mass spectrometry studies of complexes	MI:0069	32353859
SARS-CoV-2	NSP1	PRIM2	Human	mass spectrometry studies of complexes	MI:0069	32353859
SARS-CoV-2	NSP1	POLA2	Human	mass spectrometry studies of complexes	MI:0069	32353859
SARS-CoV-2	NSP1	COLGALT1	Human	mass spectrometry studies of complexes	MI:0069	32353859
SARS-CoV-2	NSP1	PKP2	Human	mass spectrometry studies of complexes	MI:0069	32353859
SARS-CoV-2	NSP10	AP2A2	Human	mass spectrometry studies of complexes	MI:0069	32353859
SARS-CoV-2	NSP10	GFER	Human	mass spectrometry studies of complexes	MI:0069	32353859
SARS-CoV-2	NSP10	ERGIC1	Human	mass spectrometry studies of complexes	MI:0069	32353859
SARS-CoV-2	NSP10	AP2M1	Human	mass spectrometry studies of complexes	MI:0069	32353859
SARS-CoV-2	NSP10	GRPEL1	Human	mass spectrometry studies of complexes	MI:0069	32353859
SARS-CoV-2	NSP11	TBCA	Human	mass spectrometry studies of complexes	MI:0069	32353859
SARS-CoV-2	NSP12	SBNO1	Human	mass spectrometry studies of complexes	MI:0069	32353859
SARS-CoV-2	NSP12	BCKDK	Human	mass spectrometry studies of complexes	MI:0069	32353859
SARS-CoV-2	NSP12	AKAP8	Human	mass spectrometry studies of complexes	MI:0069	32353859
SARS-CoV-2	NSP12	MYCBP2	Human	mass spectrometry studies of complexes	MI:0069	32353859
SARS-CoV-2	NSP12	SLU7	Human	mass spectrometry studies of complexes	MI:0069	32353859
SARS-CoV-2	NSP12	RIPK1	Human	mass spectrometry studies of complexes	MI:0069	32353859
SARS-CoV-2	NSP12	UBAP2L	Human	mass spectrometry studies of complexes	MI:0069	32353859
SARS-CoV-2	NSP12	TYSND1	Human	mass spectrometry studies of complexes	MI:0069	32353859
SARS-CoV-2	NSP12	PDZD11	Human	mass spectrometry studies of complexes	MI:0069	32353859
SARS-CoV-2	NSP12	PRRC2B	Human	mass spectrometry studies of complexes	MI:0069	32353859
SARS-CoV-2	NSP12	UBAP2	Human	mass spectrometry studies of complexes	MI:0069	32353859
SARS-CoV-2	NSP12	ZNF318	Human	mass spectrometry studies of complexes	MI:0069	32353859
SARS-CoV-2	NSP12	CRTC3	Human	mass spectrometry studies of complexes	MI:0069	32353859
SARS-CoV-2	NSP12	USP54	Human	mass spectrometry studies of complexes	MI:0069	32353859
SARS-CoV-2	NSP12	ZC3H7A	Human	mass spectrometry studies of complexes	MI:0069	32353859
SARS-CoV-2	NSP12	LARP4B	Human	mass spectrometry studies of complexes	MI:0069	32353859
SARS-CoV-2	NSP12	RBM41	Human	mass spectrometry studies of complexes	MI:0069	32353859
SARS-CoV-2	NSP12	TCF12	Human	mass spectrometry studies of complexes	MI:0069	32353859
SARS-CoV-2	NSP12	PPIL3	Human	mass spectrometry studies of complexes	MI:0069	32353859
SARS-CoV-2	NSP12	PLEKHA5	Human	mass spectrometry studies of complexes	MI:0069	32353859
SARS-CoV-2	NSP13	TBKBP1	Human	mass spectrometry studies of complexes	MI:0069	32353859
SARS-CoV-2	NSP13	CIT	Human	mass spectrometry studies of complexes	MI:0069	32353859
SARS-CoV-2	NSP13	HSBP1	Human	mass spectrometry studies of complexes	MI:0069	32353859
SARS-CoV-2	NSP13	PCNT	Human	mass spectrometry studies of complexes	MI:0069	32353859
SARS-CoV-2	NSP13	CEP43	Human	mass spectrometry studies of complexes	MI:0069	32353859
SARS-CoV-2	NSP13	PRKAR2A	Human	mass spectrometry studies of complexes	MI:0069	32353859
SARS-CoV-2	NSP13	PRKACA	Human	mass spectrometry studies of complexes	MI:0069	32353859
SARS-CoV-2	NSP13	PRKAR2B	Human	mass spectrometry studies of complexes	MI:0069	32353859
SARS-CoV-2	NSP13	RDX	Human	mass spectrometry studies of complexes	MI:0069	32353859
SARS-CoV-2	NSP13	CENPF	Human	mass spectrometry studies of complexes	MI:0069	32353859
SARS-CoV-2	NSP13	TLE1	Human	mass spectrometry studies of complexes	MI:0069	32353859
SARS-CoV-2	NSP13	TLE3	Human	mass spectrometry studies of complexes	MI:0069	32353859
SARS-CoV-2	NSP13	TLE5	Human	mass spectrometry studies of complexes	MI:0069	32353859
SARS-CoV-2	NSP13	GOLGA3	Human	mass spectrometry studies of complexes	MI:0069	32353859
SARS-CoV-2	NSP13	GOLGA2	Human	mass spectrometry studies of complexes	MI:0069	32353859
SARS-CoV-2	NSP13	GOLGB1	Human	mass spectrometry studies of complexes	MI:0069	32353859
SARS-CoV-2	NSP13	GRIPAP1	Human	mass spectrometry studies of complexes	MI:0069	32353859
SARS-CoV-2	NSP13	CEP350	Human	mass spectrometry studies of complexes	MI:0069	32353859
SARS-CoV-2	NSP13	PDE4DIP	Human	mass spectrometry studies of complexes	MI:0069	32353859
SARS-CoV-2	NSP13	CEP135	Human	mass spectrometry studies of complexes	MI:0069	32353859
SARS-CoV-2	NSP13	CEP68	Human	mass spectrometry studies of complexes	MI:0069	32353859
SARS-CoV-2	NSP13	CNTRL	Human	mass spectrometry studies of complexes	MI:0069	32353859
SARS-CoV-2	NSP13	ERC1	Human	mass spectrometry studies of complexes	MI:0069	32353859
SARS-CoV-2	NSP13	GCC2	Human	mass spectrometry studies of complexes	MI:0069	32353859
SARS-CoV-2	NSP13	CLIP4	Human	mass spectrometry studies of complexes	MI:0069	32353859
SARS-CoV-2	NSP13	NIN	Human	mass spectrometry studies of complexes	MI:0069	32353859
SARS-CoV-2	NSP13	CEP112	Human	mass spectrometry studies of complexes	MI:0069	32353859
SARS-CoV-2	NSP13	MIPOL1	Human	mass spectrometry studies of complexes	MI:0069	32353859
SARS-CoV-2	NSP13	USP13	Human	mass spectrometry studies of complexes	MI:0069	32353859
SARS-CoV-2	NSP13	GCC1	Human	mass spectrometry studies of complexes	MI:0069	32353859
SARS-CoV-2	NSP13	JAKMIP1	Human	mass spectrometry studies of complexes	MI:0069	32353859
SARS-CoV-2	NSP13	CDK5RAP2	Human	mass spectrometry studies of complexes	MI:0069	32353859
SARS-CoV-2	NSP13	AKAP9	Human	mass spectrometry studies of complexes	MI:0069	32353859
SARS-CoV-2	NSP13	GORASP1	Human	mass spectrometry studies of complexes	MI:0069	32353859
SARS-CoV-2	NSP13	FYCO1	Human	mass spectrometry studies of complexes	MI:0069	32353859
SARS-CoV-2	NSP13	C1ORF50	Human	mass spectrometry studies of complexes	MI:0069	32353859
SARS-CoV-2	NSP13	CEP250	Human	mass spectrometry studies of complexes	MI:0069	32353859
SARS-CoV-2	NSP13	TBK1	Human	mass spectrometry studies of complexes	MI:0069	32353859
SARS-CoV-2	NSP13	HOOK1	Human	mass spectrometry studies of complexes	MI:0069	32353859
SARS-CoV-2	NSP13	NINL	Human	mass spectrometry studies of complexes	MI:0069	32353859
SARS-CoV-2	NSP14	GLA	Human	mass spectrometry studies of complexes	MI:0069	32353859
SARS-CoV-2	NSP14	IMPDH2	Human	mass spectrometry studies of complexes	MI:0069	32353859
SARS-CoV-2	NSP14	SIRT5	Human	mass spectrometry studies of complexes	MI:0069	32353859
SARS-CoV-2	NSP15	NUTF2	Human	mass spectrometry studies of complexes	MI:0069	32353859
SARS-CoV-2	NSP15	ARF6	Human	mass spectrometry studies of complexes	MI:0069	32353859
SARS-CoV-2	NSP15	RNF41	Human	mass spectrometry studies of complexes	MI:0069	32353859
SARS-CoV-2	NSP2	SLC27A2	Human	mass spectrometry studies of complexes	MI:0069	32353859
SARS-CoV-2	NSP2	EIF4E2	Human	mass spectrometry studies of complexes	MI:0069	32353859
SARS-CoV-2	NSP2	POR	Human	mass spectrometry studies of complexes	MI:0069	32353859
SARS-CoV-2	NSP2	RAP1GDS1	Human	mass spectrometry studies of complexes	MI:0069	32353859
SARS-CoV-2	NSP2	WASHC4	Human	mass spectrometry studies of complexes	MI:0069	32353859
SARS-CoV-2	NSP2	FKBP15	Human	mass spectrometry studies of complexes	MI:0069	32353859
SARS-CoV-2	NSP2	GIGYF2	Human	mass spectrometry studies of complexes	MI:0069	32353859
SARS-CoV-2	NSP4	IDE	Human	mass spectrometry studies of complexes	MI:0069	32353859
SARS-CoV-2	NSP4	TIMM10	Human	mass spectrometry studies of complexes	MI:0069	32353859
SARS-CoV-2	NSP4	ALG11	Human	mass spectrometry studies of complexes	MI:0069	32353859
SARS-CoV-2	NSP4	NUP210	Human	mass spectrometry studies of complexes	MI:0069	32353859
SARS-CoV-2	NSP4	TIMM29	Human	mass spectrometry studies of complexes	MI:0069	32353859
SARS-CoV-2	NSP4	DNAJC11	Human	mass spectrometry studies of complexes	MI:0069	32353859
SARS-CoV-2	NSP4	TIMM10B	Human	mass spectrometry studies of complexes	MI:0069	32353859
SARS-CoV-2	NSP4	TIMM9	Human	mass spectrometry studies of complexes	MI:0069	32353859
SARS-CoV-2	NSP5	HDAC2	Human	mass spectrometry studies of complexes	MI:0069	32353859
SARS-CoV-2	NSP5	GPX1	Human	mass spectrometry studies of complexes	MI:0069	32353859
SARS-CoV-2	NSP5	TRMT1	Human	mass spectrometry studies of complexes	MI:0069	32353859
SARS-CoV-2	NSP6	ATP5MG	Human	mass spectrometry studies of complexes	MI:0069	32353859
SARS-CoV-2	NSP6	ATP6AP1	Human	mass spectrometry studies of complexes	MI:0069	32353859
SARS-CoV-2	NSP6	SIGMAR1	Human	mass spectrometry studies of complexes	MI:0069	32353859
SARS-CoV-2	NSP6	ATP13A3	Human	mass spectrometry studies of complexes	MI:0069	32353859
SARS-CoV-2	NSP7	AGPS	Human	mass spectrometry studies of complexes	MI:0069	32353859
SARS-CoV-2	NSP7	CYB5B	Human	mass spectrometry studies of complexes	MI:0069	32353859
SARS-CoV-2	NSP7	ACSL3	Human	mass spectrometry studies of complexes	MI:0069	32353859
SARS-CoV-2	NSP7	CYB5R3	Human	mass spectrometry studies of complexes	MI:0069	32353859
SARS-CoV-2	NSP7	RALA	Human	mass spectrometry studies of complexes	MI:0069	32353859
SARS-CoV-2	NSP7	COMT	Human	mass spectrometry studies of complexes	MI:0069	32353859
SARS-CoV-2	NSP7	RAB5C	Human	mass spectrometry studies of complexes	MI:0069	32353859
SARS-CoV-2	NSP7	RAB7A	Human	mass spectrometry studies of complexes	MI:0069	32353859
SARS-CoV-2	NSP7	RAB8A	Human	mass spectrometry studies of complexes	MI:0069	32353859
SARS-CoV-2	NSP7	RAB2A	Human	mass spectrometry studies of complexes	MI:0069	32353859
SARS-CoV-2	NSP7	RAB10	Human	mass spectrometry studies of complexes	MI:0069	32353859
SARS-CoV-2	NSP7	RAB14	Human	mass spectrometry studies of complexes	MI:0069	32353859
SARS-CoV-2	NSP7	RHOA	Human	mass spectrometry studies of complexes	MI:0069	32353859
SARS-CoV-2	NSP7	RAB1A	Human	mass spectrometry studies of complexes	MI:0069	32353859
SARS-CoV-2	NSP7	GNB1	Human	mass spectrometry studies of complexes	MI:0069	32353859
SARS-CoV-2	NSP7	GNG5	Human	mass spectrometry studies of complexes	MI:0069	32353859
SARS-CoV-2	NSP7	LMAN2	Human	mass spectrometry studies of complexes	MI:0069	32353859
SARS-CoV-2	NSP7	MOGS	Human	mass spectrometry studies of complexes	MI:0069	32353859
SARS-CoV-2	NSP7	TOR1AIP1	Human	mass spectrometry studies of complexes	MI:0069	32353859
SARS-CoV-2	NSP7	MTARC1	Human	mass spectrometry studies of complexes	MI:0069	32353859
SARS-CoV-2	NSP7	QSOX2	Human	mass spectrometry studies of complexes	MI:0069	32353859
SARS-CoV-2	NSP7	HS2ST1	Human	mass spectrometry studies of complexes	MI:0069	32353859
SARS-CoV-2	NSP7	NDUFAF2	Human	mass spectrometry studies of complexes	MI:0069	32353859
SARS-CoV-2	NSP7	SCCPDH	Human	mass spectrometry studies of complexes	MI:0069	32353859
SARS-CoV-2	NSP7	SCARB1	Human	mass spectrometry studies of complexes	MI:0069	32353859
SARS-CoV-2	NSP7	NAT14	Human	mass spectrometry studies of complexes	MI:0069	32353859
SARS-CoV-2	NSP7	DCAKD	Human	mass spectrometry studies of complexes	MI:0069	32353859
SARS-CoV-2	NSP7	FAM162A	Human	mass spectrometry studies of complexes	MI:0069	32353859
SARS-CoV-2	NSP7	DNAJC19	Human	mass spectrometry studies of complexes	MI:0069	32353859
SARS-CoV-2	NSP7	SELENOS	Human	mass spectrometry studies of complexes	MI:0069	32353859
SARS-CoV-2	NSP7	PTGES2	Human	mass spectrometry studies of complexes	MI:0069	32353859
SARS-CoV-2	NSP7	RAB18	Human	mass spectrometry studies of complexes	MI:0069	32353859
SARS-CoV-2	NSP8	MPHOSPH10	Human	mass spectrometry studies of complexes	MI:0069	32353859
SARS-CoV-2	NSP8	SRP72	Human	mass spectrometry studies of complexes	MI:0069	32353859
SARS-CoV-2	NSP8	ATE1	Human	mass spectrometry studies of complexes	MI:0069	32353859
SARS-CoV-2	NSP8	NSD2	Human	mass spectrometry studies of complexes	MI:0069	32353859
SARS-CoV-2	NSP8	SRP19	Human	mass spectrometry studies of complexes	MI:0069	32353859
SARS-CoV-2	NSP8	SRP54	Human	mass spectrometry studies of complexes	MI:0069	32353859
SARS-CoV-2	NSP8	MRPS25	Human	mass spectrometry studies of complexes	MI:0069	32353859
SARS-CoV-2	NSP8	DDX10	Human	mass spectrometry studies of complexes	MI:0069	32353859
SARS-CoV-2	NSP8	LARP7	Human	mass spectrometry studies of complexes	MI:0069	32353859
SARS-CoV-2	NSP8	MEPCE	Human	mass spectrometry studies of complexes	MI:0069	32353859
SARS-CoV-2	NSP8	NGDN	Human	mass spectrometry studies of complexes	MI:0069	32353859
SARS-CoV-2	NSP8	EXOSC8	Human	mass spectrometry studies of complexes	MI:0069	32353859
SARS-CoV-2	NSP8	NARS2	Human	mass spectrometry studies of complexes	MI:0069	32353859
SARS-CoV-2	NSP8	NOL10	Human	mass spectrometry studies of complexes	MI:0069	32353859
SARS-CoV-2	NSP8	CCDC86	Human	mass spectrometry studies of complexes	MI:0069	32353859
SARS-CoV-2	NSP8	SEPSECS	Human	mass spectrometry studies of complexes	MI:0069	32353859
SARS-CoV-2	NSP8	EXOSC5	Human	mass spectrometry studies of complexes	MI:0069	32353859
SARS-CoV-2	NSP8	EXOSC3	Human	mass spectrometry studies of complexes	MI:0069	32353859
SARS-CoV-2	NSP8	AATF	Human	mass spectrometry studies of complexes	MI:0069	32353859
SARS-CoV-2	NSP8	HECTD1	Human	mass spectrometry studies of complexes	MI:0069	32353859
SARS-CoV-2	NSP8	MRPS2	Human	mass spectrometry studies of complexes	MI:0069	32353859
SARS-CoV-2	NSP8	MRPS5	Human	mass spectrometry studies of complexes	MI:0069	32353859
SARS-CoV-2	NSP8	EXOSC2	Human	mass spectrometry studies of complexes	MI:0069	32353859
SARS-CoV-2	NSP8	MRPS27	Human	mass spectrometry studies of complexes	MI:0069	32353859
SARS-CoV-2	NSP9	GTF2F2	Human	mass spectrometry studies of complexes	MI:0069	32353859
SARS-CoV-2	NSP9	FBN1	Human	mass spectrometry studies of complexes	MI:0069	32353859
SARS-CoV-2	NSP9	FBN2	Human	mass spectrometry studies of complexes	MI:0069	32353859
SARS-CoV-2	NSP9	NUP214	Human	mass spectrometry studies of complexes	MI:0069	32353859
SARS-CoV-2	NSP9	NUP62	Human	mass spectrometry studies of complexes	MI:0069	32353859
SARS-CoV-2	NSP9	DCAF7	Human	mass spectrometry studies of complexes	MI:0069	32353859
SARS-CoV-2	NSP9	EIF4H	Human	mass spectrometry studies of complexes	MI:0069	32353859
SARS-CoV-2	NSP9	NUP54	Human	mass spectrometry studies of complexes	MI:0069	32353859
SARS-CoV-2	NSP9	MIB1	Human	mass spectrometry studies of complexes	MI:0069	32353859
SARS-CoV-2	NSP9	SPART	Human	mass spectrometry studies of complexes	MI:0069	32353859
SARS-CoV-2	NSP9	NEK9	Human	mass spectrometry studies of complexes	MI:0069	32353859
SARS-CoV-2	NSP9	ZNF503	Human	mass spectrometry studies of complexes	MI:0069	32353859
SARS-CoV-2	NSP9	NUP88	Human	mass spectrometry studies of complexes	MI:0069	32353859
SARS-CoV-2	NSP9	NUP58	Human	mass spectrometry studies of complexes	MI:0069	32353859
SARS-CoV-2	NSP9	MAT2B	Human	mass spectrometry studies of complexes	MI:0069	32353859
SARS-CoV-2	NSP9	FBLN5	Human	mass spectrometry studies of complexes	MI:0069	32353859
SARS-CoV-2	ORF10	PPT1	Human	mass spectrometry studies of complexes	MI:0069	32353859
SARS-CoV-2	ORF10	CUL2	Human	mass spectrometry studies of complexes	MI:0069	32353859
SARS-CoV-2	ORF10	MAP7D1	Human	mass spectrometry studies of complexes	MI:0069	32353859
SARS-CoV-2	ORF10	THTPA	Human	mass spectrometry studies of complexes	MI:0069	32353859
SARS-CoV-2	ORF10	ZYG11B	Human	mass spectrometry studies of complexes	MI:0069	32353859
SARS-CoV-2	ORF10	TIMM8B	Human	mass spectrometry studies of complexes	MI:0069	32353859
SARS-CoV-2	ORF10	RBX1	Human	mass spectrometry studies of complexes	MI:0069	32353859
SARS-CoV-2	ORF10	ELOC	Human	mass spectrometry studies of complexes	MI:0069	32353859
SARS-CoV-2	ORF10	ELOB	Human	mass spectrometry studies of complexes	MI:0069	32353859
SARS-CoV-2	ORF3A	HMOX1	Human	mass spectrometry studies of complexes	MI:0069	32353859
SARS-CoV-2	ORF3A	TRIM59	Human	mass spectrometry studies of complexes	MI:0069	32353859
SARS-CoV-2	ORF3A	ARL6IP6	Human	mass spectrometry studies of complexes	MI:0069	32353859
SARS-CoV-2	ORF3A	VPS39	Human	mass spectrometry studies of complexes	MI:0069	32353859
SARS-CoV-2	ORF3A	CLCC1	Human	mass spectrometry studies of complexes	MI:0069	32353859
SARS-CoV-2	ORF3A	VPS11	Human	mass spectrometry studies of complexes	MI:0069	32353859
SARS-CoV-2	ORF3A	SUN2	Human	mass spectrometry studies of complexes	MI:0069	32353859
SARS-CoV-2	ORF3A	ALG5	Human	mass spectrometry studies of complexes	MI:0069	32353859
SARS-CoV-2	ORF3B	STOML2	Human	mass spectrometry studies of complexes	MI:0069	32353859
SARS-CoV-2	ORF6	NUP98	Human	mass spectrometry studies of complexes	MI:0069	32353859
SARS-CoV-2	ORF6	RAE1	Human	mass spectrometry studies of complexes	MI:0069	32353859
SARS-CoV-2	ORF6	MTCH1	Human	mass spectrometry studies of complexes	MI:0069	32353859
SARS-CoV-2	ORF7A	HEATR3	Human	mass spectrometry studies of complexes	MI:0069	32353859
SARS-CoV-2	ORF7A	MDN1	Human	mass spectrometry studies of complexes	MI:0069	32353859
SARS-CoV-2	ORF8	PLOD2	Human	mass spectrometry studies of complexes	MI:0069	32353859
SARS-CoV-2	ORF8	TOR1A	Human	mass spectrometry studies of complexes	MI:0069	32353859
SARS-CoV-2	ORF8	STC2	Human	mass spectrometry studies of complexes	MI:0069	32353859
SARS-CoV-2	ORF8	PLAT	Human	mass spectrometry studies of complexes	MI:0069	32353859
SARS-CoV-2	ORF8	ITGB1	Human	mass spectrometry studies of complexes	MI:0069	32353859
SARS-CoV-2	ORF8	CISD3	Human	mass spectrometry studies of complexes	MI:0069	32353859
SARS-CoV-2	ORF8	COL6A1	Human	mass spectrometry studies of complexes	MI:0069	32353859
SARS-CoV-2	ORF8	PVR	Human	mass spectrometry studies of complexes	MI:0069	32353859
SARS-CoV-2	ORF8	DNMT1	Human	mass spectrometry studies of complexes	MI:0069	32353859
SARS-CoV-2	ORF8	LOX	Human	mass spectrometry studies of complexes	MI:0069	32353859
SARS-CoV-2	ORF8	PCSK6	Human	mass spectrometry studies of complexes	MI:0069	32353859
SARS-CoV-2	ORF8	INHBE	Human	mass spectrometry studies of complexes	MI:0069	32353859
SARS-CoV-2	ORF8	NPC2	Human	mass spectrometry studies of complexes	MI:0069	32353859
SARS-CoV-2	ORF8	MFGE8	Human	mass spectrometry studies of complexes	MI:0069	32353859
SARS-CoV-2	ORF8	OS9	Human	mass spectrometry studies of complexes	MI:0069	32353859
SARS-CoV-2	ORF8	NPTX1	Human	mass spectrometry studies of complexes	MI:0069	32353859
SARS-CoV-2	ORF8	POGLUT2	Human	mass spectrometry studies of complexes	MI:0069	32353859
SARS-CoV-2	ORF8	POGLUT3	Human	mass spectrometry studies of complexes	MI:0069	32353859
SARS-CoV-2	ORF8	ERO1B	Human	mass spectrometry studies of complexes	MI:0069	32353859
SARS-CoV-2	ORF8	PLD3	Human	mass spectrometry studies of complexes	MI:0069	32353859
SARS-CoV-2	ORF8	FOXRED2	Human	mass spectrometry studies of complexes	MI:0069	32353859
SARS-CoV-2	ORF8	CHPF	Human	mass spectrometry studies of complexes	MI:0069	32353859
SARS-CoV-2	ORF8	PUSL1	Human	mass spectrometry studies of complexes	MI:0069	32353859
SARS-CoV-2	ORF8	EMC1	Human	mass spectrometry studies of complexes	MI:0069	32353859
SARS-CoV-2	ORF8	GGH	Human	mass spectrometry studies of complexes	MI:0069	32353859
SARS-CoV-2	ORF8	ERLEC1	Human	mass spectrometry studies of complexes	MI:0069	32353859
SARS-CoV-2	ORF8	IL17RA	Human	mass spectrometry studies of complexes	MI:0069	32353859
SARS-CoV-2	ORF8	NGLY1	Human	mass spectrometry studies of complexes	MI:0069	32353859
SARS-CoV-2	ORF8	HS6ST2	Human	mass spectrometry studies of complexes	MI:0069	32353859
SARS-CoV-2	ORF8	SDF2	Human	mass spectrometry studies of complexes	MI:0069	32353859
SARS-CoV-2	ORF8	NEU1	Human	mass spectrometry studies of complexes	MI:0069	32353859
SARS-CoV-2	ORF8	GDF15	Human	mass spectrometry studies of complexes	MI:0069	32353859
SARS-CoV-2	ORF8	TM2D3	Human	mass spectrometry studies of complexes	MI:0069	32353859
SARS-CoV-2	ORF8	ERP44	Human	mass spectrometry studies of complexes	MI:0069	32353859
SARS-CoV-2	ORF8	EDEM3	Human	mass spectrometry studies of complexes	MI:0069	32353859
SARS-CoV-2	ORF8	SIL1	Human	mass spectrometry studies of complexes	MI:0069	32353859
SARS-CoV-2	ORF8	POFUT1	Human	mass spectrometry studies of complexes	MI:0069	32353859
SARS-CoV-2	ORF8	SMOC1	Human	mass spectrometry studies of complexes	MI:0069	32353859
SARS-CoV-2	ORF8	PLEKHF2	Human	mass spectrometry studies of complexes	MI:0069	32353859
SARS-CoV-2	ORF8	FBXL12	Human	mass spectrometry studies of complexes	MI:0069	32353859
SARS-CoV-2	ORF8	UGGT2	Human	mass spectrometry studies of complexes	MI:0069	32353859
SARS-CoV-2	ORF8	CHPF2	Human	mass spectrometry studies of complexes	MI:0069	32353859
SARS-CoV-2	ORF8	ADAMTS1	Human	mass spectrometry studies of complexes	MI:0069	32353859
SARS-CoV-2	ORF8	HYOU1	Human	mass spectrometry studies of complexes	MI:0069	32353859
SARS-CoV-2	ORF8	FKBP7	Human	mass spectrometry studies of complexes	MI:0069	32353859
SARS-CoV-2	ORF8	ADAM9	Human	mass spectrometry studies of complexes	MI:0069	32353859
SARS-CoV-2	ORF8	FKBP10	Human	mass spectrometry studies of complexes	MI:0069	32353859
SARS-CoV-2	ORF9B	SLC9A3R1	Human	mass spectrometry studies of complexes	MI:0069	32353859
SARS-CoV-2	ORF9B	CHMP2A	Human	mass spectrometry studies of complexes	MI:0069	32353859
SARS-CoV-2	ORF9B	CSDE1	Human	mass spectrometry studies of complexes	MI:0069	32353859
SARS-CoV-2	ORF9B	TOMM70	Human	mass spectrometry studies of complexes	MI:0069	32353859
SARS-CoV-2	ORF9B	MARK3	Human	mass spectrometry studies of complexes	MI:0069	32353859
SARS-CoV-2	ORF9B	MARK2	Human	mass spectrometry studies of complexes	MI:0069	32353859
SARS-CoV-2	ORF9B	DPH5	Human	mass spectrometry studies of complexes	MI:0069	32353859
SARS-CoV-2	ORF9B	DCTPP1	Human	mass spectrometry studies of complexes	MI:0069	32353859
SARS-CoV-2	ORF9B	MARK1	Human	mass spectrometry studies of complexes	MI:0069	32353859
SARS-CoV-2	ORF9B	PTBP2	Human	mass spectrometry studies of complexes	MI:0069	32353859
SARS-CoV-2	ORF9B	BAG5	Human	mass spectrometry studies of complexes	MI:0069	32353859
SARS-CoV-2	ORF9C	UBXN8	Human	mass spectrometry studies of complexes	MI:0069	32353859
SARS-CoV-2	ORF9C	GPAA1	Human	mass spectrometry studies of complexes	MI:0069	32353859
SARS-CoV-2	ORF9C	WFS1	Human	mass spectrometry studies of complexes	MI:0069	32353859
SARS-CoV-2	ORF9C	ABCC1	Human	mass spectrometry studies of complexes	MI:0069	32353859
SARS-CoV-2	ORF9C	F2RL1	Human	mass spectrometry studies of complexes	MI:0069	32353859
SARS-CoV-2	ORF9C	SCAP	Human	mass spectrometry studies of complexes	MI:0069	32353859
SARS-CoV-2	ORF9C	DPY19L1	Human	mass spectrometry studies of complexes	MI:0069	32353859
SARS-CoV-2	ORF9C	TMEM97	Human	mass spectrometry studies of complexes	MI:0069	32353859
SARS-CoV-2	ORF9C	SLC30A6	Human	mass spectrometry studies of complexes	MI:0069	32353859
SARS-CoV-2	ORF9C	TAPT1	Human	mass spectrometry studies of complexes	MI:0069	32353859
SARS-CoV-2	ORF9C	ERMP1	Human	mass spectrometry studies of complexes	MI:0069	32353859
SARS-CoV-2	ORF9C	NLRX1	Human	mass spectrometry studies of complexes	MI:0069	32353859
SARS-CoV-2	ORF9C	RETREG3	Human	mass spectrometry studies of complexes	MI:0069	32353859
SARS-CoV-2	ORF9C	PIGO	Human	mass spectrometry studies of complexes	MI:0069	32353859
SARS-CoV-2	ORF9C	FAR2	Human	mass spectrometry studies of complexes	MI:0069	32353859
SARS-CoV-2	ORF9C	ECSIT	Human	mass spectrometry studies of complexes	MI:0069	32353859
SARS-CoV-2	ORF9C	ALG8	Human	mass spectrometry studies of complexes	MI:0069	32353859
SARS-CoV-2	ORF9C	TMEM39B	Human	mass spectrometry studies of complexes	MI:0069	32353859
SARS-CoV-2	ORF9C	GHITM	Human	mass spectrometry studies of complexes	MI:0069	32353859
SARS-CoV-2	ORF9C	ACAD9	Human	mass spectrometry studies of complexes	MI:0069	32353859
SARS-CoV-2	ORF9C	NDFIP2	Human	mass spectrometry studies of complexes	MI:0069	32353859
SARS-CoV-2	ORF9C	BCS1L	Human	mass spectrometry studies of complexes	MI:0069	32353859
SARS-CoV-2	ORF9C	NDUFAF1	Human	mass spectrometry studies of complexes	MI:0069	32353859
SARS-CoV-2	ORF9C	TMED5	Human	mass spectrometry studies of complexes	MI:0069	32353859
SARS-CoV-2	ORF9C	NDUFB9	Human	mass spectrometry studies of complexes	MI:0069	32353859
SARS-CoV-2	ORF9C	PIGS	Human	mass spectrometry studies of complexes	MI:0069	32353859
MHV	NSP2	EPB41	Mouse	proximity-dependent biotin identification	MI:1314	30632963
MHV	NSP2	CDV3	Mouse	proximity-dependent biotin identification	MI:1314	30632963
MHV	NSP2	AGFG1	Mouse	proximity-dependent biotin identification	MI:1314	30632963
MHV	NSP2	TNS1	Mouse	proximity-dependent biotin identification	MI:1314	30632963
MHV	NSP2	AGAP1	Mouse	proximity-dependent biotin identification	MI:1314	30632963
MHV	NSP2	RAPGEF2	Mouse	proximity-dependent biotin identification	MI:1314	30632963
MHV	NSP2	RAB3GAP2	Mouse	proximity-dependent biotin identification	MI:1314	30632963
MHV	NSP2	LDAH	Mouse	proximity-dependent biotin identification	MI:1314	30632963
MHV	NSP2	FAM133B	Mouse	proximity-dependent biotin identification	MI:1314	30632963
MHV	NSP2	IGF2BP1	Mouse	proximity-dependent biotin identification	MI:1314	30632963
MHV	NSP2	RAB11FIP5	Mouse	proximity-dependent biotin identification	MI:1314	30632963
MHV	NSP2	UBXN4	Mouse	proximity-dependent biotin identification	MI:1314	30632963
MHV	NSP2	ACBD3	Mouse	proximity-dependent biotin identification	MI:1314	30632963
MHV	NSP2	STT3B	Mouse	proximity-dependent biotin identification	MI:1314	30632963
MHV	NSP2	MON1A	Mouse	proximity-dependent biotin identification	MI:1314	30632963
MHV	NSP2	FNDC3B	Mouse	proximity-dependent biotin identification	MI:1314	30632963
MHV	NSP2	VCPIP1	Mouse	proximity-dependent biotin identification	MI:1314	30632963
MHV	NSP2	OSBPL8	Mouse	proximity-dependent biotin identification	MI:1314	30632963
MHV	NSP2	MARK2	Mouse	proximity-dependent biotin identification	MI:1314	30632963
MHV	NSP2	SYNCRIP	Mouse	proximity-dependent biotin identification	MI:1314	30632963
MHV	NSP2	PPME1	Mouse	proximity-dependent biotin identification	MI:1314	30632963
MHV	NSP2	SEC23IP	Mouse	proximity-dependent biotin identification	MI:1314	30632963
MHV	NSP2	EIF4G2	Mouse	proximity-dependent biotin identification	MI:1314	30632963
MHV	NSP2	FAM13C	Mouse	proximity-dependent biotin identification	MI:1314	30632963
MHV	NSP2	LPIN3	Mouse	proximity-dependent biotin identification	MI:1314	30632963
MHV	NSP2	CEP85	Mouse	proximity-dependent biotin identification	MI:1314	30632963
MHV	NSP2	CHD7	Mouse	proximity-dependent biotin identification	MI:1314	30632963
MHV	NSP2	LRRC57	Mouse	proximity-dependent biotin identification	MI:1314	30632963
MHV	NSP2	EMD	Mouse	proximity-dependent biotin identification	MI:1314	30632963
MHV	NSP2	UBAP2	Mouse	proximity-dependent biotin identification	MI:1314	30632963
MHV	NSP2	ITPRIPL1	Mouse	proximity-dependent biotin identification	MI:1314	30632963
MHV	NSP2	RRBP1	Mouse	proximity-dependent biotin identification	MI:1314	30632963
MHV	NSP2	SLK	Mouse	proximity-dependent biotin identification	MI:1314	30632963
MHV	NSP2	CRKL	Mouse	proximity-dependent biotin identification	MI:1314	30632963
MHV	NSP2	NAP1L4	Mouse	proximity-dependent biotin identification	MI:1314	30632963
MHV	NSP2	STIM2	Mouse	proximity-dependent biotin identification	MI:1314	30632963
MHV	NSP2	BAG3	Mouse	proximity-dependent biotin identification	MI:1314	30632963
MHV	NSP2	THADA	Mouse	proximity-dependent biotin identification	MI:1314	30632963
MHV	NSP2	NUDCD3	Mouse	proximity-dependent biotin identification	MI:1314	30632963
MHV	NSP2	DHRS13	Mouse	proximity-dependent biotin identification	MI:1314	30632963
MHV	NSP2	EIF2B3	Mouse	proximity-dependent biotin identification	MI:1314	30632963
MHV	NSP2	COBLL1	Mouse	proximity-dependent biotin identification	MI:1314	30632963
MHV	NSP2	PALD1	Mouse	proximity-dependent biotin identification	MI:1314	30632963
MHV	NSP2	STRN3	Mouse	proximity-dependent biotin identification	MI:1314	30632963
MHV	NSP2	RABGAP1	Mouse	proximity-dependent biotin identification	MI:1314	30632963
MHV	NSP2	PDAP1	Mouse	proximity-dependent biotin identification	MI:1314	30632963
MHV	NSP2	ARHGAP35	Mouse	proximity-dependent biotin identification	MI:1314	30632963
MHV	NSP2	PARD3	Mouse	proximity-dependent biotin identification	MI:1314	30632963
MHV	NSP2	OTUD7B	Mouse	proximity-dependent biotin identification	MI:1314	30632963
MHV	NSP2	FAM91A1	Mouse	proximity-dependent biotin identification	MI:1314	30632963
MHV	NSP2	MPP1	Mouse	proximity-dependent biotin identification	MI:1314	30632963
MHV	NSP2	ANAPC1	Mouse	proximity-dependent biotin identification	MI:1314	30632963
MHV	NSP2	ANKRD11	Mouse	proximity-dependent biotin identification	MI:1314	30632963
MHV	NSP2	LRCH3	Mouse	proximity-dependent biotin identification	MI:1314	30632963
MHV	NSP2	TJP1	Mouse	proximity-dependent biotin identification	MI:1314	30632963
MHV	NSP2	MYO9B	Mouse	proximity-dependent biotin identification	MI:1314	30632963
MHV	NSP2	SH3PXD2B	Mouse	proximity-dependent biotin identification	MI:1314	30632963
MHV	NSP2	PDZD8	Mouse	proximity-dependent biotin identification	MI:1314	30632963
MHV	NSP2	PASK	Mouse	proximity-dependent biotin identification	MI:1314	30632963
MHV	NSP2	ARHGAP5	Mouse	proximity-dependent biotin identification	MI:1314	30632963
MHV	NSP2	FLNA	Mouse	proximity-dependent biotin identification	MI:1314	30632963
MHV	NSP2	TBC1D8B	Mouse	proximity-dependent biotin identification	MI:1314	30632963
MHV	NSP2	NFIX	Mouse	proximity-dependent biotin identification	MI:1314	30632963
MHV	NSP2	MYO5A	Mouse	proximity-dependent biotin identification	MI:1314	30632963
MHV	NSP2	PREB	Mouse	proximity-dependent biotin identification	MI:1314	30632963
MHV	NSP2	PSMG1	Mouse	proximity-dependent biotin identification	MI:1314	30632963
MHV	NSP2	CIP2A	Mouse	proximity-dependent biotin identification	MI:1314	30632963
MHV	NSP2	EDC4	Mouse	proximity-dependent biotin identification	MI:1314	30632963
MHV	NSP2	IPO9	Mouse	proximity-dependent biotin identification	MI:1314	30632963
MHV	NSP2	NUDCD2	Mouse	proximity-dependent biotin identification	MI:1314	30632963
MHV	NSP2	CIAPIN1	Mouse	proximity-dependent biotin identification	MI:1314	30632963
MHV	NSP2	MSTO1	Mouse	proximity-dependent biotin identification	MI:1314	30632963
MHV	NSP2	DNM1L	Mouse	proximity-dependent biotin identification	MI:1314	30632963
MHV	NSP2	ABR	Mouse	proximity-dependent biotin identification	MI:1314	30632963
MHV	NSP2	EIF4G1	Mouse	proximity-dependent biotin identification	MI:1314	30632963
MHV	NSP2	MAP4K5	Mouse	proximity-dependent biotin identification	MI:1314	30632963
MHV	NSP2	CUL4B	Mouse	proximity-dependent biotin identification	MI:1314	30632963
MHV	NSP2	ASCC3	Mouse	proximity-dependent biotin identification	MI:1314	30632963
MHV	NSP2	LARP4	Mouse	proximity-dependent biotin identification	MI:1314	30632963
MHV	NSP2	HSPH1	Mouse	proximity-dependent biotin identification	MI:1314	30632963
MHV	NSP2	DVL3	Mouse	proximity-dependent biotin identification	MI:1314	30632963
MHV	NSP2	ATAD2B	Mouse	proximity-dependent biotin identification	MI:1314	30632963
MHV	NSP2	MYO18A	Mouse	proximity-dependent biotin identification	MI:1314	30632963
MHV	NSP2	NBAS	Mouse	proximity-dependent biotin identification	MI:1314	30632963
MHV	NSP2	KIF13B	Mouse	proximity-dependent biotin identification	MI:1314	30632963
MHV	NSP2	RNF213	Mouse	proximity-dependent biotin identification	MI:1314	30632963
MHV	NSP2	AHNAK	Mouse	proximity-dependent biotin identification	MI:1314	30632963
MHV	NSP2	UBE4A	Mouse	proximity-dependent biotin identification	MI:1314	30632963
MHV	NSP2	DNAJC2	Mouse	proximity-dependent biotin identification	MI:1314	30632963
MHV	NSP2	TANC1	Mouse	proximity-dependent biotin identification	MI:1314	30632963
MHV	NSP2	ANKRD17	Mouse	proximity-dependent biotin identification	MI:1314	30632963
MHV	NSP2	INF2	Mouse	proximity-dependent biotin identification	MI:1314	30632963
MHV	NSP2	ASAP1	Mouse	proximity-dependent biotin identification	MI:1314	30632963
MHV	NSP2	LEMD3	Mouse	proximity-dependent biotin identification	MI:1314	30632963
MHV	NSP2	RAPH1	Mouse	proximity-dependent biotin identification	MI:1314	30632963
MHV	NSP2	DAB2	Mouse	proximity-dependent biotin identification	MI:1314	30632963
MHV	NSP2	TFEB	Mouse	proximity-dependent biotin identification	MI:1314	30632963
MHV	NSP2	ATP2B4	Mouse	proximity-dependent biotin identification	MI:1314	30632963
MHV	NSP2	ATXN2	Mouse	proximity-dependent biotin identification	MI:1314	30632963
MHV	NSP2	TTC37	Mouse	proximity-dependent biotin identification	MI:1314	30632963
MHV	NSP2	PXN	Mouse	proximity-dependent biotin identification	MI:1314	30632963
MHV	NSP2	AGAP3	Mouse	proximity-dependent biotin identification	MI:1314	30632963
MHV	NSP2	VANGL1	Mouse	proximity-dependent biotin identification	MI:1314	30632963
MHV	NSP2	HECTD1	Mouse	proximity-dependent biotin identification	MI:1314	30632963
MHV	NSP2	SLMAP	Mouse	proximity-dependent biotin identification	MI:1314	30632963
MHV	NSP2	GIGYF2	Mouse	proximity-dependent biotin identification	MI:1314	30632963
MHV	NSP2	OBI1	Mouse	proximity-dependent biotin identification	MI:1314	30632963
MHV	NSP2	NAA15	Mouse	proximity-dependent biotin identification	MI:1314	30632963
MHV	NSP2	CTNND1	Mouse	proximity-dependent biotin identification	MI:1314	30632963
MHV	NSP2	PAK1	Mouse	proximity-dependent biotin identification	MI:1314	30632963
MHV	NSP2	OSBPL11	Mouse	proximity-dependent biotin identification	MI:1314	30632963
MHV	NSP2	ARFIP1	Mouse	proximity-dependent biotin identification	MI:1314	30632963
MHV	NSP2	CEP170	Mouse	proximity-dependent biotin identification	MI:1314	30632963
MHV	NSP2	PTK2	Mouse	proximity-dependent biotin identification	MI:1314	30632963
MHV	NSP2	SEC22B	Mouse	proximity-dependent biotin identification	MI:1314	30632963
MHV	NSP2	DPYSL2	Mouse	proximity-dependent biotin identification	MI:1314	30632963
MHV	NSP2	STXBP1	Mouse	proximity-dependent biotin identification	MI:1314	30632963
MHV	NSP2	UBE3A	Mouse	proximity-dependent biotin identification	MI:1314	30632963
MHV	NSP2	PSMD4	Mouse	proximity-dependent biotin identification	MI:1314	30632963
MHV	NSP2	FKBP8	Mouse	proximity-dependent biotin identification	MI:1314	30632963
MHV	NSP2	NUDC	Mouse	proximity-dependent biotin identification	MI:1314	30632963
MHV	NSP2	COPB2	Mouse	proximity-dependent biotin identification	MI:1314	30632963
MHV	NSP2	ILK	Mouse	proximity-dependent biotin identification	MI:1314	30632963
MHV	NSP2	PLIN4	Mouse	proximity-dependent biotin identification	MI:1314	30632963
MHV	NSP2	BIRC6	Mouse	proximity-dependent biotin identification	MI:1314	30632963
MHV	NSP2	SRP54	Mouse	proximity-dependent biotin identification	MI:1314	30632963
MHV	NSP2	IFRD1	Mouse	proximity-dependent biotin identification	MI:1314	30632963
MHV	NSP2	ENO3	Mouse	proximity-dependent biotin identification	MI:1314	30632963
MHV	NSP2	AP1G1	Mouse	proximity-dependent biotin identification	MI:1314	30632963
MHV	NSP2	TLN1	Mouse	proximity-dependent biotin identification	MI:1314	30632963
MHV	NSP2	PLAA	Mouse	proximity-dependent biotin identification	MI:1314	30632963
MHV	NSP2	KIF2A	Mouse	proximity-dependent biotin identification	MI:1314	30632963
MHV	NSP2	PRKAR2B	Mouse	proximity-dependent biotin identification	MI:1314	30632963
MHV	NSP2	PTPN12	Mouse	proximity-dependent biotin identification	MI:1314	30632963
MHV	NSP2	POR	Mouse	proximity-dependent biotin identification	MI:1314	30632963
MHV	NSP2	PSMC2	Mouse	proximity-dependent biotin identification	MI:1314	30632963
MHV	NSP2	YAP1	Mouse	proximity-dependent biotin identification	MI:1314	30632963
MHV	NSP2	ALDH3A2	Mouse	proximity-dependent biotin identification	MI:1314	30632963
MHV	NSP2	FPGS	Mouse	proximity-dependent biotin identification	MI:1314	30632963
MHV	NSP2	S100A11	Mouse	proximity-dependent biotin identification	MI:1314	30632963
MHV	NSP2	CAST	Mouse	proximity-dependent biotin identification	MI:1314	30632963
MHV	NSP2	DVL1	Mouse	proximity-dependent biotin identification	MI:1314	30632963
MHV	NSP2	USP10	Mouse	proximity-dependent biotin identification	MI:1314	30632963
MHV	NSP2	YTHDF1	Mouse	proximity-dependent biotin identification	MI:1314	30632963
MHV	NSP2	SNRPE	Mouse	proximity-dependent biotin identification	MI:1314	30632963
MHV	NSP2	ITPR3	Mouse	proximity-dependent biotin identification	MI:1314	30632963
MHV	NSP2	HINT1	Mouse	proximity-dependent biotin identification	MI:1314	30632963
MHV	NSP2	NACA	Mouse	proximity-dependent biotin identification	MI:1314	30632963
MHV	NSP2	MCM2	Mouse	proximity-dependent biotin identification	MI:1314	30632963
MHV	NSP2	DOK1	Mouse	proximity-dependent biotin identification	MI:1314	30632963
MHV	NSP2	THUMPD3	Mouse	proximity-dependent biotin identification	MI:1314	30632963
MHV	NSP2	G3BP1	Mouse	proximity-dependent biotin identification	MI:1314	30632963
MHV	NSP2	MARK3	Mouse	proximity-dependent biotin identification	MI:1314	30632963
MHV	NSP2	CUL5	Mouse	proximity-dependent biotin identification	MI:1314	30632963
MHV	NSP2	UTP3	Mouse	proximity-dependent biotin identification	MI:1314	30632963
MHV	NSP2	PTPN2	Mouse	proximity-dependent biotin identification	MI:1314	30632963
MHV	NSP2	CCDC47	Mouse	proximity-dependent biotin identification	MI:1314	30632963
MHV	NSP2	DHRS9	Mouse	proximity-dependent biotin identification	MI:1314	30632963
MHV	NSP2	CDK12	Mouse	proximity-dependent biotin identification	MI:1314	30632963
MHV	NSP2	ZADH2	Mouse	proximity-dependent biotin identification	MI:1314	30632963
MHV	NSP2	UBR1	Mouse	proximity-dependent biotin identification	MI:1314	30632963
MHV	NSP2	NSFL1C	Mouse	proximity-dependent biotin identification	MI:1314	30632963
MHV	NSP2	GLMN	Mouse	proximity-dependent biotin identification	MI:1314	30632963
MHV	NSP2	SH3KBP1	Mouse	proximity-dependent biotin identification	MI:1314	30632963
MHV	NSP2	PLEKHF1	Mouse	proximity-dependent biotin identification	MI:1314	30632963
MHV	NSP2	GNE	Mouse	proximity-dependent biotin identification	MI:1314	30632963
MHV	NSP2	ZYX	Mouse	proximity-dependent biotin identification	MI:1314	30632963
MHV	NSP2	PICALM	Mouse	proximity-dependent biotin identification	MI:1314	30632963
MHV	NSP2	FAF2	Mouse	proximity-dependent biotin identification	MI:1314	30632963
MHV	NSP2	RPL13A	Mouse	proximity-dependent biotin identification	MI:1314	30632963
MHV	NSP2	CAVIN1	Mouse	proximity-dependent biotin identification	MI:1314	30632963
MHV	NSP2	NAP1L1	Mouse	proximity-dependent biotin identification	MI:1314	30632963
MHV	NSP2	TMOD3	Mouse	proximity-dependent biotin identification	MI:1314	30632963
MHV	NSP2	KPNB1	Mouse	proximity-dependent biotin identification	MI:1314	30632963
MHV	NSP2	GORASP2	Mouse	proximity-dependent biotin identification	MI:1314	30632963
MHV	NSP2	STAM2	Mouse	proximity-dependent biotin identification	MI:1314	30632963
MHV	NSP2	STIP1	Mouse	proximity-dependent biotin identification	MI:1314	30632963
MHV	NSP2	RRM2	Mouse	proximity-dependent biotin identification	MI:1314	30632963
MHV	NSP2	MVP	Mouse	proximity-dependent biotin identification	MI:1314	30632963
MHV	NSP2	RIC8A	Mouse	proximity-dependent biotin identification	MI:1314	30632963
MHV	NSP2	PDE12	Mouse	proximity-dependent biotin identification	MI:1314	30632963
MHV	NSP2	ZC3H15	Mouse	proximity-dependent biotin identification	MI:1314	30632963
MHV	NSP2	APBB2	Mouse	proximity-dependent biotin identification	MI:1314	30632963
MHV	NSP2	RAB5C	Mouse	proximity-dependent biotin identification	MI:1314	30632963
MHV	NSP2	TNPO1	Mouse	proximity-dependent biotin identification	MI:1314	30632963
MHV	NSP2	ATXN10	Mouse	proximity-dependent biotin identification	MI:1314	30632963
MHV	NSP2	CDK5RAP3	Mouse	proximity-dependent biotin identification	MI:1314	30632963
MHV	NSP2	SMOX	Mouse	proximity-dependent biotin identification	MI:1314	30632963
MHV	NSP2	PCYT2	Mouse	proximity-dependent biotin identification	MI:1314	30632963
MHV	NSP2	TRIP6	Mouse	proximity-dependent biotin identification	MI:1314	30632963
MHV	NSP2	CYP4B1	Mouse	proximity-dependent biotin identification	MI:1314	30632963
MHV	NSP2	ITPRIP	Mouse	proximity-dependent biotin identification	MI:1314	30632963
MHV	NSP2	AP3B1	Mouse	proximity-dependent biotin identification	MI:1314	30632963
MHV	NSP2	EIF5	Mouse	proximity-dependent biotin identification	MI:1314	30632963
MHV	NSP2	VPS36	Mouse	proximity-dependent biotin identification	MI:1314	30632963
MHV	NSP2	RASA1	Mouse	proximity-dependent biotin identification	MI:1314	30632963
MHV	NSP2	LUC7L	Mouse	proximity-dependent biotin identification	MI:1314	30632963
MHV	NSP2	SPART	Mouse	proximity-dependent biotin identification	MI:1314	30632963
MHV	NSP2	LMCD1	Mouse	proximity-dependent biotin identification	MI:1314	30632963
MHV	NSP2	RAB32	Mouse	proximity-dependent biotin identification	MI:1314	30632963
MHV	NSP2	OLA1	Mouse	proximity-dependent biotin identification	MI:1314	30632963
MHV	NSP2	DYNC1LI1	Mouse	proximity-dependent biotin identification	MI:1314	30632963
MHV	NSP2	PSMD1	Mouse	proximity-dependent biotin identification	MI:1314	30632963
MHV	NSP2	TMEM199	Mouse	proximity-dependent biotin identification	MI:1314	30632963
MHV	NSP2	HELZ2	Mouse	proximity-dependent biotin identification	MI:1314	30632963
MHV	NSP2	SF1	Mouse	proximity-dependent biotin identification	MI:1314	30632963
MHV	NSP2	SECISBP2	Mouse	proximity-dependent biotin identification	MI:1314	30632963
MHV	NSP2	SNX9	Mouse	proximity-dependent biotin identification	MI:1314	30632963
MHV	NSP2	IRS2	Mouse	proximity-dependent biotin identification	MI:1314	30632963
MHV	NSP2	SH3GL1	Mouse	proximity-dependent biotin identification	MI:1314	30632963
MHV	NSP2	STRN4	Mouse	proximity-dependent biotin identification	MI:1314	30632963
MHV	NSP2	DDX3Y	Mouse	proximity-dependent biotin identification	MI:1314	30632963
MHV	NSP2	SNX1	Mouse	proximity-dependent biotin identification	MI:1314	30632963
MHV	NSP2	HDLBP	Mouse	proximity-dependent biotin identification	MI:1314	30632963
MHV	NSP2	TARS1	Mouse	proximity-dependent biotin identification	MI:1314	30632963
MHV	NSP2	RBM14	Mouse	proximity-dependent biotin identification	MI:1314	30632963
MHV	NSP2	PARP10	Mouse	proximity-dependent biotin identification	MI:1314	30632963
MHV	NSP2	RCC1	Mouse	proximity-dependent biotin identification	MI:1314	30632963
MHV	NSP2	JPT2	Mouse	proximity-dependent biotin identification	MI:1314	30632963
MHV	NSP2	TXNL1	Mouse	proximity-dependent biotin identification	MI:1314	30632963
MHV	NSP2	GALNT2	Mouse	proximity-dependent biotin identification	MI:1314	30632963
MHV	NSP2	PPID	Mouse	proximity-dependent biotin identification	MI:1314	30632963
MHV	NSP2	BPNT1	Mouse	proximity-dependent biotin identification	MI:1314	30632963
MHV	NSP2	PTPN1	Mouse	proximity-dependent biotin identification	MI:1314	30632963
MHV	NSP2	PUF60	Mouse	proximity-dependent biotin identification	MI:1314	30632963
MHV	NSP2	FGG	Mouse	proximity-dependent biotin identification	MI:1314	30632963
MHV	NSP2	CAPN1	Mouse	proximity-dependent biotin identification	MI:1314	30632963
MHV	NSP2	AP1M1	Mouse	proximity-dependent biotin identification	MI:1314	30632963
MHV	NSP2	STK10	Mouse	proximity-dependent biotin identification	MI:1314	30632963
MHV	NSP2	STRIP1	Mouse	proximity-dependent biotin identification	MI:1314	30632963
MHV	NSP2	RASA3	Mouse	proximity-dependent biotin identification	MI:1314	30632963
MHV	NSP2	KAT7	Mouse	proximity-dependent biotin identification	MI:1314	30632963
MHV	NSP2	NUMBL	Mouse	proximity-dependent biotin identification	MI:1314	30632963
MHV	NSP2	AAK1	Mouse	proximity-dependent biotin identification	MI:1314	30632963
MHV	NSP2	GCN1	Mouse	proximity-dependent biotin identification	MI:1314	30632963
MHV	NSP2	HSD17B4	Mouse	proximity-dependent biotin identification	MI:1314	30632963
MHV	NSP2	GTF3C5	Mouse	proximity-dependent biotin identification	MI:1314	30632963
MHV	NSP2	NMT1	Mouse	proximity-dependent biotin identification	MI:1314	30632963
MHV	NSP2	BTF3	Mouse	proximity-dependent biotin identification	MI:1314	30632963
MHV	NSP2	TRIP4	Mouse	proximity-dependent biotin identification	MI:1314	30632963
MHV	NSP2	ACSL5	Mouse	proximity-dependent biotin identification	MI:1314	30632963
MHV	NSP2	CCT8	Mouse	proximity-dependent biotin identification	MI:1314	30632963
MHV	NSP2	XDH	Mouse	proximity-dependent biotin identification	MI:1314	30632963
MHV	NSP2	TMPO	Mouse	proximity-dependent biotin identification	MI:1314	30632963
MHV	NSP2	HID1	Mouse	proximity-dependent biotin identification	MI:1314	30632963
MHV	NSP2	CAP1	Mouse	proximity-dependent biotin identification	MI:1314	30632963
MHV	NSP2	NIBAN1	Mouse	proximity-dependent biotin identification	MI:1314	30632963
MHV	NSP2	LRRFIP1	Mouse	proximity-dependent biotin identification	MI:1314	30632963
MHV	NSP2	PDCL	Mouse	proximity-dependent biotin identification	MI:1314	30632963
MHV	NSP2	NT5C2	Mouse	proximity-dependent biotin identification	MI:1314	30632963
MHV	NSP2	SMAD3	Mouse	proximity-dependent biotin identification	MI:1314	30632963
MHV	NSP2	FKBP5	Mouse	proximity-dependent biotin identification	MI:1314	30632963
MHV	NSP2	CRIP2	Mouse	proximity-dependent biotin identification	MI:1314	30632963
MHV	NSP2	EZR	Mouse	proximity-dependent biotin identification	MI:1314	30632963
MHV	NSP2	ARAP1	Mouse	proximity-dependent biotin identification	MI:1314	30632963
MHV	NSP2	TBC1D15	Mouse	proximity-dependent biotin identification	MI:1314	30632963
MHV	NSP2	GTF3C4	Mouse	proximity-dependent biotin identification	MI:1314	30632963
MHV	NSP2	SPTLC2	Mouse	proximity-dependent biotin identification	MI:1314	30632963
MHV	NSP2	HCLS1	Mouse	proximity-dependent biotin identification	MI:1314	30632963
MHV	NSP2	PRKAB1	Mouse	proximity-dependent biotin identification	MI:1314	30632963
MHV	NSP2	KPNA3	Mouse	proximity-dependent biotin identification	MI:1314	30632963
MHV	NSP2	IRS1	Mouse	proximity-dependent biotin identification	MI:1314	30632963
MHV	NSP2	HMOX2	Mouse	proximity-dependent biotin identification	MI:1314	30632963
MHV	NSP2	PSMB3	Mouse	proximity-dependent biotin identification	MI:1314	30632963
MHV	NSP2	SURF4	Mouse	proximity-dependent biotin identification	MI:1314	30632963
MHV	NSP2	NDRG1	Mouse	proximity-dependent biotin identification	MI:1314	30632963
MHV	NSP2	URB1	Mouse	proximity-dependent biotin identification	MI:1314	30632963
MHV	NSP2	ADNP	Mouse	proximity-dependent biotin identification	MI:1314	30632963
MHV	NSP2	TAP1	Mouse	proximity-dependent biotin identification	MI:1314	30632963
MHV	NSP2	RSL24D1	Mouse	proximity-dependent biotin identification	MI:1314	30632963
MHV	NSP2	NUFIP2	Mouse	proximity-dependent biotin identification	MI:1314	30632963
MHV	NSP2	ARHGAP1	Mouse	proximity-dependent biotin identification	MI:1314	30632963
MHV	NSP2	OSBPL9	Mouse	proximity-dependent biotin identification	MI:1314	30632963
MHV	NSP2	SNCG	Mouse	proximity-dependent biotin identification	MI:1314	30632963
MHV	NSP2	CRK	Mouse	proximity-dependent biotin identification	MI:1314	30632963
MHV	NSP2	HEATR5A	Mouse	proximity-dependent biotin identification	MI:1314	30632963
MHV	NSP2	CANX	Mouse	proximity-dependent biotin identification	MI:1314	30632963
MHV	NSP2	CLINT1	Mouse	proximity-dependent biotin identification	MI:1314	30632963
MHV	NSP2	UTP20	Mouse	proximity-dependent biotin identification	MI:1314	30632963
MHV	NSP2	ACBD5	Mouse	proximity-dependent biotin identification	MI:1314	30632963
MHV	NSP2	CTTN	Mouse	proximity-dependent biotin identification	MI:1314	30632963
MHV	NSP2	HNRNPD	Mouse	proximity-dependent biotin identification	MI:1314	30632963
MHV	NSP2	KHDRBS1	Mouse	proximity-dependent biotin identification	MI:1314	30632963
MHV	NSP2	STXBP3	Mouse	proximity-dependent biotin identification	MI:1314	30632963
MHV	NSP2	DVL2	Mouse	proximity-dependent biotin identification	MI:1314	30632963
MHV	NSP2	CDC37	Mouse	proximity-dependent biotin identification	MI:1314	30632963
MHV	NSP2	GAG	Mouse	proximity-dependent biotin identification	MI:1314	30632963
MHV	NSP2	IGBP1	Mouse	proximity-dependent biotin identification	MI:1314	30632963
MHV	NSP2	FXR1	Mouse	proximity-dependent biotin identification	MI:1314	30632963
MHV	NSP2	ARHGDIB	Mouse	proximity-dependent biotin identification	MI:1314	30632963
MHV	NSP2	PON3	Mouse	proximity-dependent biotin identification	MI:1314	30632963
MHV	NSP2	DBNL	Mouse	proximity-dependent biotin identification	MI:1314	30632963
MHV	NSP2	SQSTM1	Mouse	proximity-dependent biotin identification	MI:1314	30632963
MHV	NSP2	EHBP1	Mouse	proximity-dependent biotin identification	MI:1314	30632963
MHV	NSP2	SWAP70	Mouse	proximity-dependent biotin identification	MI:1314	30632963
MHV	NSP2	GBF1	Mouse	proximity-dependent biotin identification	MI:1314	30632963
MHV	NSP2	TNPO3	Mouse	proximity-dependent biotin identification	MI:1314	30632963
MHV	NSP2	EIF3F	Mouse	proximity-dependent biotin identification	MI:1314	30632963
MHV	NSP2	NIPBL	Mouse	proximity-dependent biotin identification	MI:1314	30632963
MHV	NSP2	RETREG2	Mouse	proximity-dependent biotin identification	MI:1314	30632963
MHV	NSP2	WDR44	Mouse	proximity-dependent biotin identification	MI:1314	30632963
MHV	NSP2	HELB	Mouse	proximity-dependent biotin identification	MI:1314	30632963
MHV	NSP2	WWC2	Mouse	proximity-dependent biotin identification	MI:1314	30632963
MHV	NSP2	SEC24D	Mouse	proximity-dependent biotin identification	MI:1314	30632963
MHV	NSP2	BIN1	Mouse	proximity-dependent biotin identification	MI:1314	30632963
MHV	NSP2	ANKLE2	Mouse	proximity-dependent biotin identification	MI:1314	30632963
MHV	NSP2	EYA3	Mouse	proximity-dependent biotin identification	MI:1314	30632963
MHV	NSP2	SNX6	Mouse	proximity-dependent biotin identification	MI:1314	30632963
MHV	NSP2	KIF15	Mouse	proximity-dependent biotin identification	MI:1314	30632963
MHV	NSP2	KIF11	Mouse	proximity-dependent biotin identification	MI:1314	30632963
MHV	NSP2	ARHGEF18	Mouse	proximity-dependent biotin identification	MI:1314	30632963
MHV	NSP2	GSN	Mouse	proximity-dependent biotin identification	MI:1314	30632963
MHV	NSP2	GAPVD1	Mouse	proximity-dependent biotin identification	MI:1314	30632963
MHV	NSP2	PTPN23	Mouse	proximity-dependent biotin identification	MI:1314	30632963
MHV	NSP2	DYNC1LI2	Mouse	proximity-dependent biotin identification	MI:1314	30632963
MHV	NSP2	WASHC2	Mouse	proximity-dependent biotin identification	MI:1314	30632963
MHV	NSP2	NUDCD1	Mouse	proximity-dependent biotin identification	MI:1314	30632963
MHV	NSP2	GM38495	Mouse	proximity-dependent biotin identification	MI:1314	30632963
MHV	NSP2	SBF1	Mouse	proximity-dependent biotin identification	MI:1314	30632963
MHV	NSP2	TEX2	Mouse	proximity-dependent biotin identification	MI:1314	30632963
MHV	NSP2	ZFYVE1	Mouse	proximity-dependent biotin identification	MI:1314	30632963
MHV	NSP2	CAMK2G	Mouse	proximity-dependent biotin identification	MI:1314	30632963
MHV	NSP2	FBXO22	Mouse	proximity-dependent biotin identification	MI:1314	30632963
MHV	NSP2	SLFN9	Mouse	proximity-dependent biotin identification	MI:1314	30632963
MHV	NSP2	SHQ1	Mouse	proximity-dependent biotin identification	MI:1314	30632963
MHV	NSP2	YTHDF3	Mouse	proximity-dependent biotin identification	MI:1314	30632963
MHV	NSP2	LNPK	Mouse	proximity-dependent biotin identification	MI:1314	30632963
MHV	NSP2	EIF2AK3	Mouse	proximity-dependent biotin identification	MI:1314	30632963
MHV	NSP2	ATXN2L	Mouse	proximity-dependent biotin identification	MI:1314	30632963
MHV	NSP2	AVL9	Mouse	proximity-dependent biotin identification	MI:1314	30632963
MHV	NSP2	RAB3GAP1	Mouse	proximity-dependent biotin identification	MI:1314	30632963
MHV	NSP2	PGRMC2	Mouse	proximity-dependent biotin identification	MI:1314	30632963
MHV	NSP2	DHX33	Mouse	proximity-dependent biotin identification	MI:1314	30632963
MHV	NSP2	RO60	Mouse	proximity-dependent biotin identification	MI:1314	30632963
MHV	NSP2	WIPI2	Mouse	proximity-dependent biotin identification	MI:1314	30632963
MHV	NSP2	TAP2	Mouse	proximity-dependent biotin identification	MI:1314	30632963
MHV	NSP2	DDRGK1	Mouse	proximity-dependent biotin identification	MI:1314	30632963
MHV	NSP2	UBAP2L	Mouse	proximity-dependent biotin identification	MI:1314	30632963
MHV	NSP2	ATG2B	Mouse	proximity-dependent biotin identification	MI:1314	30632963
MHV	NSP2	DDHD2	Mouse	proximity-dependent biotin identification	MI:1314	30632963
MHV	NSP2	SEC63	Mouse	proximity-dependent biotin identification	MI:1314	30632963
MHV	NSP2	SEC24B	Mouse	proximity-dependent biotin identification	MI:1314	30632963
MHV	NSP2	HM13	Mouse	proximity-dependent biotin identification	MI:1314	30632963
MHV	NSP2	LPP	Mouse	proximity-dependent biotin identification	MI:1314	30632963
MHV	NSP2	EIF4B	Mouse	proximity-dependent biotin identification	MI:1314	30632963
MHV	NSP2	MAK16	Mouse	proximity-dependent biotin identification	MI:1314	30632963
MHV	NSP2	TIPRL	Mouse	proximity-dependent biotin identification	MI:1314	30632963
MHV	NSP2	EHD2	Mouse	proximity-dependent biotin identification	MI:1314	30632963
MHV	NSP2	VAPB	Mouse	proximity-dependent biotin identification	MI:1314	30632963
MHV	NSP2	PRR11	Mouse	proximity-dependent biotin identification	MI:1314	30632963
MHV	NSP2	ERCC6L	Mouse	proximity-dependent biotin identification	MI:1314	30632963
MHV	NSP2	RIOK2	Mouse	proximity-dependent biotin identification	MI:1314	30632963
MHV	NSP2	PRUNE1	Mouse	proximity-dependent biotin identification	MI:1314	30632963
MHV	NSP2	ZC2HC1A	Mouse	proximity-dependent biotin identification	MI:1314	30632963
MHV	NSP2	EIF2A	Mouse	proximity-dependent biotin identification	MI:1314	30632963
MHV	NSP2	IPO5	Mouse	proximity-dependent biotin identification	MI:1314	30632963
MHV	NSP2	CYP20A1	Mouse	proximity-dependent biotin identification	MI:1314	30632963
MHV	NSP2	TNRC6B	Mouse	proximity-dependent biotin identification	MI:1314	30632963
MHV	NSP2	ADD3	Mouse	proximity-dependent biotin identification	MI:1314	30632963
MHV	NSP2	SRP68	Mouse	proximity-dependent biotin identification	MI:1314	30632963
MHV	NSP2	GEN1	Mouse	proximity-dependent biotin identification	MI:1314	30632963
MHV	NSP2	MICAL2	Mouse	proximity-dependent biotin identification	MI:1314	30632963
MHV	NSP2	VRK2	Mouse	proximity-dependent biotin identification	MI:1314	30632963
MHV	NSP2	BET1	Mouse	proximity-dependent biotin identification	MI:1314	30632963
MHV	NSP2	SCFD1	Mouse	proximity-dependent biotin identification	MI:1314	30632963
MHV	NSP2	TMEM209	Mouse	proximity-dependent biotin identification	MI:1314	30632963
MHV	NSP2	MRE11	Mouse	proximity-dependent biotin identification	MI:1314	30632963
MHV	NSP2	RMDN2	Mouse	proximity-dependent biotin identification	MI:1314	30632963
MHV	NSP2	CASP12	Mouse	proximity-dependent biotin identification	MI:1314	30632963
MHV	NSP2	CERT1	Mouse	proximity-dependent biotin identification	MI:1314	30632963
MHV	NSP2	SSB	Mouse	proximity-dependent biotin identification	MI:1314	30632963
MHV	NSP2	PPA1	Mouse	proximity-dependent biotin identification	MI:1314	30632963
MHV	NSP2	KANK2	Mouse	proximity-dependent biotin identification	MI:1314	30632963
MHV	NSP2	USP47	Mouse	proximity-dependent biotin identification	MI:1314	30632963
MHV	NSP2	TTK	Mouse	proximity-dependent biotin identification	MI:1314	30632963
MHV	NSP2	RINT1	Mouse	proximity-dependent biotin identification	MI:1314	30632963
MHV	NSP2	EFL1	Mouse	proximity-dependent biotin identification	MI:1314	30632963
MHV	NSP2	GPAT3	Mouse	proximity-dependent biotin identification	MI:1314	30632963
MHV	NSP2	SH3BP2	Mouse	proximity-dependent biotin identification	MI:1314	30632963
MHV	NSP2	2310022B05RIK	Mouse	proximity-dependent biotin identification	MI:1314	30632963
MHV	NSP2	KNTC1	Mouse	proximity-dependent biotin identification	MI:1314	30632963
MHV	NSP2	STAT1	Mouse	proximity-dependent biotin identification	MI:1314	30632963
MHV	NSP2	SNX5	Mouse	proximity-dependent biotin identification	MI:1314	30632963
MHV	NSP2	CFAP36	Mouse	proximity-dependent biotin identification	MI:1314	30632963
MHV	NSP2	STBD1	Mouse	proximity-dependent biotin identification	MI:1314	30632963
MHV	NSP2	EFHD2	Mouse	proximity-dependent biotin identification	MI:1314	30632963
MHV	NSP2	HAUS6	Mouse	proximity-dependent biotin identification	MI:1314	30632963
MHV	NSP2	PRPF31	Mouse	proximity-dependent biotin identification	MI:1314	30632963
MHV	NSP2	LIMA1	Mouse	proximity-dependent biotin identification	MI:1314	30632963
MHV	NSP2	POLR2B	Mouse	proximity-dependent biotin identification	MI:1314	30632963
MHV	NSP2	FUS	Mouse	proximity-dependent biotin identification	MI:1314	30632963
MHV	NSP2	FBXO4	Mouse	proximity-dependent biotin identification	MI:1314	30632963
MHV	NSP2	PDLIM5	Mouse	proximity-dependent biotin identification	MI:1314	30632963
MHV	NSP2	PAK2	Mouse	proximity-dependent biotin identification	MI:1314	30632963
MHV	NSP2	AGO2	Mouse	proximity-dependent biotin identification	MI:1314	30632963
MHV	NSP2	CSDE1	Mouse	proximity-dependent biotin identification	MI:1314	30632963
MHV	NSP2	CYP51A1	Mouse	proximity-dependent biotin identification	MI:1314	30632963
MHV	NSP2	STX5	Mouse	proximity-dependent biotin identification	MI:1314	30632963
MHV	NSP2	SPATS2	Mouse	proximity-dependent biotin identification	MI:1314	30632963
MHV	NSP2	MEPCE	Mouse	proximity-dependent biotin identification	MI:1314	30632963
MHV	NSP2	SVIL	Mouse	proximity-dependent biotin identification	MI:1314	30632963
MHV	NSP2	DLGAP5	Mouse	proximity-dependent biotin identification	MI:1314	30632963
MHV	NSP2	MAPRE2	Mouse	proximity-dependent biotin identification	MI:1314	30632963
MHV	NSP2	GSPT1	Mouse	proximity-dependent biotin identification	MI:1314	30632963
MHV	NSP2	UGP2	Mouse	proximity-dependent biotin identification	MI:1314	30632963
MHV	NSP2	CHMP7	Mouse	proximity-dependent biotin identification	MI:1314	30632963
MHV	NSP2	CCDC59	Mouse	proximity-dependent biotin identification	MI:1314	30632963
MHV	NSP2	WIPI1	Mouse	proximity-dependent biotin identification	MI:1314	30632963
MHV	NSP2	SNAP47	Mouse	proximity-dependent biotin identification	MI:1314	30632963
MHV	NSP2	USP15	Mouse	proximity-dependent biotin identification	MI:1314	30632963
MHV	NSP2	APOBR	Mouse	proximity-dependent biotin identification	MI:1314	30632963
MHV	NSP2	ASPSCR1	Mouse	proximity-dependent biotin identification	MI:1314	30632963
MHV	NSP2	CALD1	Mouse	proximity-dependent biotin identification	MI:1314	30632963
MHV	NSP2	UHRF1	Mouse	proximity-dependent biotin identification	MI:1314	30632963
MHV	NSP2	STX18	Mouse	proximity-dependent biotin identification	MI:1314	30632963
MHV	NSP2	FAM114A2	Mouse	proximity-dependent biotin identification	MI:1314	30632963
MHV	NSP2	RETREG1	Mouse	proximity-dependent biotin identification	MI:1314	30632963
MHV	NSP2	PPP2R5D	Mouse	proximity-dependent biotin identification	MI:1314	30632963
MHV	NSP2	STK38	Mouse	proximity-dependent biotin identification	MI:1314	30632963
MHV	NSP2	SNX2	Mouse	proximity-dependent biotin identification	MI:1314	30632963
MHV	NSP2	SMAP1	Mouse	proximity-dependent biotin identification	MI:1314	30632963
MHV	NSP2	TDRD3	Mouse	proximity-dependent biotin identification	MI:1314	30632963
MHV	NSP2	SETD3	Mouse	proximity-dependent biotin identification	MI:1314	30632963
MHV	NSP2	CDKAL1	Mouse	proximity-dependent biotin identification	MI:1314	30632963
MHV	NSP2	WWOX	Mouse	proximity-dependent biotin identification	MI:1314	30632963
MHV	NSP2	AS3MT	Mouse	proximity-dependent biotin identification	MI:1314	30632963
MHV	NSP2	RANGAP1	Mouse	proximity-dependent biotin identification	MI:1314	30632963
MHV	NSP2	YTHDF2	Mouse	proximity-dependent biotin identification	MI:1314	30632963
MHV	NSP2	CTBP2	Mouse	proximity-dependent biotin identification	MI:1314	30632963
MHV	NSP2	SH3BP4	Mouse	proximity-dependent biotin identification	MI:1314	30632963
MHV	NSP2	USP4	Mouse	proximity-dependent biotin identification	MI:1314	30632963
MHV	NSP2	DDX1	Mouse	proximity-dependent biotin identification	MI:1314	30632963
MHV	NSP2	PRMT7	Mouse	proximity-dependent biotin identification	MI:1314	30632963
MHV	NSP2	NANS	Mouse	proximity-dependent biotin identification	MI:1314	30632963
MHV	NSP2	PDXDC1	Mouse	proximity-dependent biotin identification	MI:1314	30632963
MHV	NSP2	ARFGAP2	Mouse	proximity-dependent biotin identification	MI:1314	30632963
MHV	NSP2	EPS8L2	Mouse	proximity-dependent biotin identification	MI:1314	30632963
MHV	NSP2	CLCC1	Mouse	proximity-dependent biotin identification	MI:1314	30632963
MHV	NSP2	NCK1	Mouse	proximity-dependent biotin identification	MI:1314	30632963
MHV	NSP2	RTN4	Mouse	proximity-dependent biotin identification	MI:1314	30632963
MHV	NSP2	USE1	Mouse	proximity-dependent biotin identification	MI:1314	30632963
MHV	NSP2	YKT6	Mouse	proximity-dependent biotin identification	MI:1314	30632963
MHV	NSP2	ECD	Mouse	proximity-dependent biotin identification	MI:1314	30632963
MHV	NSP2	EIF3E	Mouse	proximity-dependent biotin identification	MI:1314	30632963
MHV	NSP2	SUGT1	Mouse	proximity-dependent biotin identification	MI:1314	30632963
MHV	NSP2	SERBP1	Mouse	proximity-dependent biotin identification	MI:1314	30632963
MHV	NSP2	MXRA7	Mouse	proximity-dependent biotin identification	MI:1314	30632963
MHV	NSP2	ARPIN	Mouse	proximity-dependent biotin identification	MI:1314	30632963
MHV	NSP2	LMAN1	Mouse	proximity-dependent biotin identification	MI:1314	30632963
MHV	NSP2	TBCB	Mouse	proximity-dependent biotin identification	MI:1314	30632963
MHV	NSP2	SEC13	Mouse	proximity-dependent biotin identification	MI:1314	30632963
MHV	NSP2	FAM114A1	Mouse	proximity-dependent biotin identification	MI:1314	30632963
MHV	NSP2	AACS	Mouse	proximity-dependent biotin identification	MI:1314	30632963
MHV	NSP2	EPHX1	Mouse	proximity-dependent biotin identification	MI:1314	30632963
MHV	NSP2	UBXN8	Mouse	proximity-dependent biotin identification	MI:1314	30632963
MHV	NSP2	SYAP1	Mouse	proximity-dependent biotin identification	MI:1314	30632963
MHV	NSP2	RPAP3	Mouse	proximity-dependent biotin identification	MI:1314	30632963
MHV	NSP2	TIMM50	Mouse	proximity-dependent biotin identification	MI:1314	30632963
MHV	NSP2	CHMP4B	Mouse	proximity-dependent biotin identification	MI:1314	30632963
MHV	NSP2	CNN3	Mouse	proximity-dependent biotin identification	MI:1314	30632963
MHV	NSP2	PLIN3	Mouse	proximity-dependent biotin identification	MI:1314	30632963
MHV	NSP2	DNAJC10	Mouse	proximity-dependent biotin identification	MI:1314	30632963
MHV	NSP2	CBX3	Mouse	proximity-dependent biotin identification	MI:1314	30632963
MHV	NSP2	TJAP1	Mouse	proximity-dependent biotin identification	MI:1314	30632963
MHV	NSP2	CYB5R3	Mouse	proximity-dependent biotin identification	MI:1314	30632963
MHV	NSP2	SACM1L	Mouse	proximity-dependent biotin identification	MI:1314	30632963
MHV	NSP2	RAI14	Mouse	proximity-dependent biotin identification	MI:1314	30632963
MHV	NSP2	ARFGAP1	Mouse	proximity-dependent biotin identification	MI:1314	30632963
MHV	NSP2	IPO7	Mouse	proximity-dependent biotin identification	MI:1314	30632963
MHV	NSP2	ELP4	Mouse	proximity-dependent biotin identification	MI:1314	30632963
MHV	NSP2	SNAP29	Mouse	proximity-dependent biotin identification	MI:1314	30632963
MHV	NSP2	CSE1L	Mouse	proximity-dependent biotin identification	MI:1314	30632963
MHV	NSP2	RANBP2	Mouse	proximity-dependent biotin identification	MI:1314	30632963
MHV	NSP2	PKMYT1	Mouse	proximity-dependent biotin identification	MI:1314	30632963
MHV	NSP2	EIF4ENIF1	Mouse	proximity-dependent biotin identification	MI:1314	30632963
MHV	NSP2	SLC1A5	Mouse	proximity-dependent biotin identification	MI:1314	30632963
MHV	NSP2	ISYNA1	Mouse	proximity-dependent biotin identification	MI:1314	30632963
MHV	NSP2	STAT5A	Mouse	proximity-dependent biotin identification	MI:1314	30632963
MHV	NSP2	PRAF2	Mouse	proximity-dependent biotin identification	MI:1314	30632963
MHV	NSP2	MAP2K1	Mouse	proximity-dependent biotin identification	MI:1314	30632963
MHV	NSP2	UBE2J1	Mouse	proximity-dependent biotin identification	MI:1314	30632963
MHV	NSP2	NUDT5	Mouse	proximity-dependent biotin identification	MI:1314	30632963
MHV	NSP2	MINK1	Mouse	proximity-dependent biotin identification	MI:1314	30632963
MHV	NSP2	CHAF1A	Mouse	proximity-dependent biotin identification	MI:1314	30632963
MHV	NSP2	COPG2	Mouse	proximity-dependent biotin identification	MI:1314	30632963
MHV	NSP2	EIF3I	Mouse	proximity-dependent biotin identification	MI:1314	30632963
MHV	NSP2	BCAR3	Mouse	proximity-dependent biotin identification	MI:1314	30632963
MHV	NSP2	AFDN	Mouse	proximity-dependent biotin identification	MI:1314	30632963
MHV	NSP2	PEX14	Mouse	proximity-dependent biotin identification	MI:1314	30632963
MHV	NSP2	LYPLA2	Mouse	proximity-dependent biotin identification	MI:1314	30632963
MHV	NSP2	TRPV2	Mouse	proximity-dependent biotin identification	MI:1314	30632963
MHV	NSP2	PDCD6IP	Mouse	proximity-dependent biotin identification	MI:1314	30632963
MHV	NSP2	VAPA	Mouse	proximity-dependent biotin identification	MI:1314	30632963
MHV	NSP2	TWF2	Mouse	proximity-dependent biotin identification	MI:1314	30632963
MHV	NSP2	TBC1D8	Mouse	proximity-dependent biotin identification	MI:1314	30632963
MHV	NSP2	UBA2	Mouse	proximity-dependent biotin identification	MI:1314	30632963
MHV	NSP2	ABHD16A	Mouse	proximity-dependent biotin identification	MI:1314	30632963
MHV	NSP2	RPS6KA4	Mouse	proximity-dependent biotin identification	MI:1314	30632963
MHV	NSP2	HNRNPF	Mouse	proximity-dependent biotin identification	MI:1314	30632963
MHV	NSP2	GPX4	Mouse	proximity-dependent biotin identification	MI:1314	30632963
MHV	NSP2	DST	Mouse	proximity-dependent biotin identification	MI:1314	30632963
MHV	NSP2	PRRC2C	Mouse	proximity-dependent biotin identification	MI:1314	30632963
MHV	NSP2	LARP1	Mouse	proximity-dependent biotin identification	MI:1314	30632963
MHV	NSP2	EIF4G3	Mouse	proximity-dependent biotin identification	MI:1314	30632963
MHV	NSP2	CKAP5	Mouse	proximity-dependent biotin identification	MI:1314	30632963
PEDV	ORF3	VPS36	Human	anti tag coimmunoprecipitation	MI:0007	31022991
PEDV	ORF3	IKBKB	Human	anti tag coimmunoprecipitation	MI:0007	31022991
PEDV	ORF3	VPS36	Human	mass spectrometry studies of complexes	MI:0069	31022991
PEDV	ORF3	IKBKB	Human	mass spectrometry studies of complexes	MI:0069	31022991
PEDV	ORF3	VPS36	Human	confocal microscopy	MI:0663	31022991
PEDV	ORF3	IKBKB	Human	confocal microscopy	MI:0663	31022991
PEDV	ORF3	GSTP1	Human	mass spectrometry studies of complexes	MI:0069	31022991
PEDV	ORF3	ADAMTSL3	Human	mass spectrometry studies of complexes	MI:0069	31022991
PEDV	ORF3	SNX13	Human	mass spectrometry studies of complexes	MI:0069	31022991
PEDV	ORF3	ZNF443	Human	mass spectrometry studies of complexes	MI:0069	31022991
PEDV	ORF3	NDUFA13	Human	mass spectrometry studies of complexes	MI:0069	31022991
PEDV	ORF3	FZD6	Human	mass spectrometry studies of complexes	MI:0069	31022991
PEDV	ORF3	MAT2A	Human	mass spectrometry studies of complexes	MI:0069	31022991
PEDV	ORF3	RIPPLY3	Human	mass spectrometry studies of complexes	MI:0069	31022991
PEDV	ORF3	CALM1	Human	mass spectrometry studies of complexes	MI:0069	31022991
PEDV	ORF3	SFSWAP	Human	mass spectrometry studies of complexes	MI:0069	31022991
PEDV	ORF3	STAT4	Human	mass spectrometry studies of complexes	MI:0069	31022991
PEDV	ORF3	FIP1L1	Human	mass spectrometry studies of complexes	MI:0069	31022991
PEDV	ORF3	PLAU	Human	mass spectrometry studies of complexes	MI:0069	31022991
PEDV	ORF3	MCOLN2	Human	mass spectrometry studies of complexes	MI:0069	31022991
PEDV	ORF3	TANC1	Human	mass spectrometry studies of complexes	MI:0069	31022991
PEDV	ORF3	MARCHF10	Human	mass spectrometry studies of complexes	MI:0069	31022991
PEDV	ORF3	CEP44	Human	mass spectrometry studies of complexes	MI:0069	31022991
PEDV	ORF3	ATPAF2	Human	mass spectrometry studies of complexes	MI:0069	31022991
PEDV	ORF3	XPNPEP3	Human	mass spectrometry studies of complexes	MI:0069	31022991
PEDV	ORF3	IRAG1	Human	mass spectrometry studies of complexes	MI:0069	31022991
SARS-CoV	S	EIF3F	Human	two hybrid	MI:0018	18231581
SARS-CoV	S	EIF3F	Human	anti tag coimmunoprecipitation	MI:0007	18231581
SARS-CoV	S	EIF3F	Human	coimmunoprecipitation	MI:0019	18231581
SARS-CoV	S	EIF3F	Human	fluorescence microscopy	MI:0416	18231581
SARS-CoV	S	EIF3F	Human	cosedimentation through density gradient	MI:0029	18231581
IBV	S	EIF3F	Human	anti tag coimmunoprecipitation	MI:0007	18231581
IBV	S	EIF3F	Human	coimmunoprecipitation	MI:0019	18231581
SARS-CoV	ORF13	RYBP	Human	two hybrid	MI:0018	22046132
SARS-CoV	NSP1	PPIA	Human	two hybrid	MI:0018	22046132
SARS-CoV	NSP8	NOMO3	Human	two hybrid	MI:0018	22046132
SARS-CoV	NSP1	FKBP1A	Human	two hybrid	MI:0018	22046132
SARS-CoV	NSP1	PPIG	Human	two hybrid	MI:0018	22046132
SARS-CoV	ORF9B	MARK3	Human	two hybrid	MI:0018	22046132
SARS-CoV	NSP1	PPIH	Human	two hybrid	MI:0018	22046132
SARS-CoV	NSP1	RCAN3	Human	two hybrid	MI:0018	22046132
SARS-CoV	ORF14	HGS	Human	two hybrid	MI:0018	22046132
SARS-CoV	ORF8A	BAG6	Human	two hybrid	MI:0018	22046132
SARS-CoV	NSP7	DDAH2	Human	two hybrid	MI:0018	22046132
SARS-CoV	ORF7B	CAMLG	Human	two hybrid	MI:0018	22046132
SARS-CoV	NSP12	CHMP2B	Human	two hybrid	MI:0018	22046132
SARS-CoV	NSP13	RYBP	Human	two hybrid	MI:0018	22046132
SARS-CoV	NSP12	SNAP47	Human	two hybrid	MI:0018	22046132
SARS-CoV	NSP3	MKRN2	Human	two hybrid	MI:0018	22046132
SARS-CoV	NSP12	TPSAB1	Human	two hybrid	MI:0018	22046132
SARS-CoV	NSP14	SERPING1	Human	two hybrid	MI:0018	22046132
SARS-CoV	NSP3	MKRN3	Human	two hybrid	MI:0018	22046132
SARS-CoV	NSP9	CHMP2B	Human	two hybrid	MI:0018	22046132
SARS-CoV	ORF9B	PSMA2	Human	two hybrid	MI:0018	22046132
SARS-CoV	NSP9	RSRP1	Human	two hybrid	MI:0018	22046132
SARS-CoV	NSP3	ZNF410	Human	two hybrid	MI:0018	22046132
SARS-CoV	NSP12	POLR2B	Human	two hybrid	MI:0018	22046132
SARS-CoV	NSP2	DEDD2	Human	two hybrid	MI:0018	22046132
SARS-CoV	NSP14	DCTN2	Human	two hybrid	MI:0018	22046132
SARS-CoV	NSP9	NPHP3	Human	two hybrid	MI:0018	22046132
SARS-CoV	NSP12	TPSB2	Human	two hybrid	MI:0018	22046132
SARS-CoV	ORF3B	DCTN2	Human	two hybrid	MI:0018	22046132
SARS-CoV	NSP7	RNF128	Human	two hybrid	MI:0018	22046132
SARS-CoV	NSP7	BAP1	Human	two hybrid	MI:0018	22046132
SARS-CoV	ORF14	SERPING1	Human	two hybrid	MI:0018	22046132
SARS-CoV	NSP7	ARL4D	Human	two hybrid	MI:0018	22046132
SARS-CoV	NSP12	CCHCR1	Human	two hybrid	MI:0018	22046132
SARS-CoV	NSP9	FAHD1	Human	two hybrid	MI:0018	22046132
SARS-CoV	NSP8	BZW2	Human	two hybrid	MI:0018	22046132
SARS-CoV	NSP7	NCOA5	Human	two hybrid	MI:0018	22046132
SARS-CoV	ORF3B	SERPING1	Human	two hybrid	MI:0018	22046132
SARS-CoV	ORF3B	ALB	Human	two hybrid	MI:0018	22046132
SARS-CoV	NSP7	YWHAE	Human	two hybrid	MI:0018	22046132
SARS-CoV	ORF7B	SERPING1	Human	two hybrid	MI:0018	22046132
SARS-CoV	NSP13	MARK3	Human	two hybrid	MI:0018	22046132
SARS-CoV	NSP9	ENO1	Human	two hybrid	MI:0018	22046132
SARS-CoV	NSP13	MARK2	Human	two hybrid	MI:0018	22046132
SARS-CoV	NSP3	ABHD17A	Human	two hybrid	MI:0018	22046132
SARS-CoV	NSP12	PFDN5	Human	two hybrid	MI:0018	22046132
SARS-CoV	ORF6	DCTN2	Human	two hybrid	MI:0018	22046132
SARS-CoV	NSP7	MIF4GD	Human	two hybrid	MI:0018	22046132
SARS-CoV	NSP12	NDUFA10	Human	two hybrid	MI:0018	22046132
SARS-CoV	NSP9	SNAP47	Human	two hybrid	MI:0018	22046132
SARS-CoV	NSP2	SERPING1	Human	two hybrid	MI:0018	22046132
SARS-CoV	ORF7A	VKORC1	Human	two hybrid	MI:0018	22046132
SARS-CoV	NSP1	LAS1L	Human	two hybrid	MI:0018	22046132
SARS-CoV	ORF14	DCTN2	Human	two hybrid	MI:0018	22046132
SARS-CoV	NSP5	FKBP1A	Human	two hybrid	MI:0018	22046132
SARS-CoV	NSP8	MACROH2A2	Human	two hybrid	MI:0018	22046132
SARS-CoV	ORF9B	RPS20	Human	two hybrid	MI:0018	22046132
SARS-CoV	NSP13	CHEK2	Human	two hybrid	MI:0018	22046132
SARS-CoV	NSP8	TERF1	Human	two hybrid	MI:0018	22046132
SARS-CoV	NSP6	ISLR	Human	two hybrid	MI:0018	22046132
SARS-CoV	NSP12	TBCB	Human	two hybrid	MI:0018	22046132
SARS-CoV	NSP4	NMB	Human	two hybrid	MI:0018	22046132
SARS-CoV	NSP4	LAS1L	Human	two hybrid	MI:0018	22046132
SARS-CoV	ORF3A	DCTN2	Human	two hybrid	MI:0018	22046132
SARS-CoV	NSP12	MNAT1	Human	two hybrid	MI:0018	22046132
SARS-CoV	NSP7	NAE1	Human	two hybrid	MI:0018	22046132
SARS-CoV	NSP12	HOXC6	Human	two hybrid	MI:0018	22046132
SARS-CoV	ORF3A	YWHAE	Human	two hybrid	MI:0018	22046132
SARS-CoV	NSP8	SERPING1	Human	two hybrid	MI:0018	22046132
SARS-CoV	NSP13	SERPING1	Human	two hybrid	MI:0018	22046132
SARS-CoV	NSP7	PLEKHO1	Human	two hybrid	MI:0018	22046132
SARS-CoV	NSP15	PPIA	Human	two hybrid	MI:0018	22046132
SARS-CoV	NSP5	N4BP2L2	Human	two hybrid	MI:0018	22046132
SARS-CoV	NSP5	XPA	Human	two hybrid	MI:0018	22046132
SARS-CoV	NSP8	EIF4B	Human	two hybrid	MI:0018	22046132
SARS-CoV	NSP5	C20ORF27	Human	two hybrid	MI:0018	22046132
SARS-CoV	NSP7	LCP1	Human	two hybrid	MI:0018	22046132
SARS-CoV	ORF7A	SMOC1	Human	two hybrid	MI:0018	22046132
SARS-CoV	ORF3A	PFDN5	Human	two hybrid	MI:0018	22046132
SARS-CoV	ORF9B	RPS17	Human	two hybrid	MI:0018	22046132
SARS-CoV	NSP2	NPHP3	Human	two hybrid	MI:0018	22046132
SARS-CoV	ORF6	BRF1	Human	two hybrid	MI:0018	22046132
SARS-CoV	ORF14	YAE1	Human	two hybrid	MI:0018	22046132
SARS-CoV	NSP13	OCIAD2	Human	two hybrid	MI:0018	22046132
SARS-CoV	NSP2	SLC46A3	Human	two hybrid	MI:0018	22046132
SARS-CoV	NSP13	N4BP2L2	Human	two hybrid	MI:0018	22046132
SARS-CoV	ORF13	RYBP	Human	luminescence based mammalian interactome mapping	MI:0729	22046132
SARS-CoV	NSP1	PPIA	Human	luminescence based mammalian interactome mapping	MI:0729	22046132
SARS-CoV	NSP8	NOMO3	Human	luminescence based mammalian interactome mapping	MI:0729	22046132
SARS-CoV	NSP1	FKBP1A	Human	luminescence based mammalian interactome mapping	MI:0729	22046132
SARS-CoV	NSP1	PPIG	Human	luminescence based mammalian interactome mapping	MI:0729	22046132
SARS-CoV	ORF9B	MARK3	Human	luminescence based mammalian interactome mapping	MI:0729	22046132
SARS-CoV	NSP1	PPIH	Human	luminescence based mammalian interactome mapping	MI:0729	22046132
SARS-CoV	NSP1	RCAN3	Human	luminescence based mammalian interactome mapping	MI:0729	22046132
SARS-CoV	ORF14	HGS	Human	luminescence based mammalian interactome mapping	MI:0729	22046132
SARS-CoV	ORF8A	BAG6	Human	luminescence based mammalian interactome mapping	MI:0729	22046132
SARS-CoV	NSP7	DDAH2	Human	luminescence based mammalian interactome mapping	MI:0729	22046132
SARS-CoV	ORF7B	CAMLG	Human	luminescence based mammalian interactome mapping	MI:0729	22046132
SARS-CoV	NSP12	CHMP2B	Human	luminescence based mammalian interactome mapping	MI:0729	22046132
SARS-CoV	NSP13	RYBP	Human	luminescence based mammalian interactome mapping	MI:0729	22046132
SARS-CoV	NSP12	SNAP47	Human	luminescence based mammalian interactome mapping	MI:0729	22046132
SARS-CoV	NSP3	MKRN2	Human	luminescence based mammalian interactome mapping	MI:0729	22046132
SARS-CoV	NSP12	TPSAB1	Human	luminescence based mammalian interactome mapping	MI:0729	22046132
SARS-CoV	NSP14	SERPING1	Human	luminescence based mammalian interactome mapping	MI:0729	22046132
SARS-CoV	NSP3	MKRN3	Human	luminescence based mammalian interactome mapping	MI:0729	22046132
SARS-CoV	NSP9	CHMP2B	Human	luminescence based mammalian interactome mapping	MI:0729	22046132
SARS-CoV	ORF9B	PSMA2	Human	luminescence based mammalian interactome mapping	MI:0729	22046132
SARS-CoV	NSP3	ABHD17A	Human	luminescence based mammalian interactome mapping	MI:0729	22046132
SARS-CoV	NSP12	PFDN5	Human	luminescence based mammalian interactome mapping	MI:0729	22046132
SARS-CoV	ORF6	DCTN2	Human	luminescence based mammalian interactome mapping	MI:0729	22046132
SARS-CoV	NSP7	MIF4GD	Human	luminescence based mammalian interactome mapping	MI:0729	22046132
SARS-CoV	NSP12	NDUFA10	Human	luminescence based mammalian interactome mapping	MI:0729	22046132
SARS-CoV	NSP9	SNAP47	Human	luminescence based mammalian interactome mapping	MI:0729	22046132
SARS-CoV	NSP2	SERPING1	Human	luminescence based mammalian interactome mapping	MI:0729	22046132
SARS-CoV	ORF7A	VKORC1	Human	luminescence based mammalian interactome mapping	MI:0729	22046132
SARS-CoV	NSP1	LAS1L	Human	luminescence based mammalian interactome mapping	MI:0729	22046132
SARS-CoV	ORF14	DCTN2	Human	luminescence based mammalian interactome mapping	MI:0729	22046132
SARS-CoV	NSP5	FKBP1A	Human	luminescence based mammalian interactome mapping	MI:0729	22046132
SARS-CoV	NSP8	MACROH2A2	Human	luminescence based mammalian interactome mapping	MI:0729	22046132
SARS-CoV	ORF9B	RPS20	Human	luminescence based mammalian interactome mapping	MI:0729	22046132
SARS-CoV	NSP13	CHEK2	Human	luminescence based mammalian interactome mapping	MI:0729	22046132
SARS-CoV	NSP8	TERF1	Human	luminescence based mammalian interactome mapping	MI:0729	22046132
IBV	N	RPL19	Human	mass spectrometry studies of complexes	MI:0069	23637410
IBV	N	RPL35	Human	mass spectrometry studies of complexes	MI:0069	23637410
IBV	N	CAPRIN1	Human	mass spectrometry studies of complexes	MI:0069	23637410
IBV	N	G3BP2	Human	mass spectrometry studies of complexes	MI:0069	23637410
IBV	N	RPL31	Human	mass spectrometry studies of complexes	MI:0069	23637410
IBV	N	RPL13	Human	mass spectrometry studies of complexes	MI:0069	23637410
IBV	N	RPS18	Human	mass spectrometry studies of complexes	MI:0069	23637410
IBV	N	RPS3A	Human	mass spectrometry studies of complexes	MI:0069	23637410
IBV	N	G3BP1	Human	mass spectrometry studies of complexes	MI:0069	23637410
IBV	N	ALYREF	Human	mass spectrometry studies of complexes	MI:0069	23637410
IBV	N	RPS9	Human	mass spectrometry studies of complexes	MI:0069	23637410
IBV	N	RPS19	Human	mass spectrometry studies of complexes	MI:0069	23637410
IBV	N	RPS16	Human	mass spectrometry studies of complexes	MI:0069	23637410
IBV	N	RPS5	Human	mass spectrometry studies of complexes	MI:0069	23637410
IBV	N	RPL24	Human	mass spectrometry studies of complexes	MI:0069	23637410
IBV	N	RPS8	Human	mass spectrometry studies of complexes	MI:0069	23637410
IBV	N	RPL26	Human	mass spectrometry studies of complexes	MI:0069	23637410
IBV	N	RPL22	Human	mass spectrometry studies of complexes	MI:0069	23637410
IBV	N	YBX1	Human	mass spectrometry studies of complexes	MI:0069	23637410
IBV	N	RPS11	Human	mass spectrometry studies of complexes	MI:0069	23637410
IBV	N	RPS10	Human	mass spectrometry studies of complexes	MI:0069	23637410
IBV	N	RPS17	Human	mass spectrometry studies of complexes	MI:0069	23637410
IBV	N	RPS25	Human	mass spectrometry studies of complexes	MI:0069	23637410
IBV	N	SRSF4	Human	mass spectrometry studies of complexes	MI:0069	23637410
IBV	N	RPS3	Human	mass spectrometry studies of complexes	MI:0069	23637410
IBV	N	RPL4	Human	mass spectrometry studies of complexes	MI:0069	23637410
IBV	N	RPS14	Human	mass spectrometry studies of complexes	MI:0069	23637410
IBV	N	RPS26	Human	mass spectrometry studies of complexes	MI:0069	23637410
IBV	N	SRSF3	Human	mass spectrometry studies of complexes	MI:0069	23637410
IBV	N	RPS23	Human	mass spectrometry studies of complexes	MI:0069	23637410
IBV	N	RPS12	Human	mass spectrometry studies of complexes	MI:0069	23637410
IBV	N	RPL15	Human	mass spectrometry studies of complexes	MI:0069	23637410
IBV	N	RPS13	Human	mass spectrometry studies of complexes	MI:0069	23637410
IBV	N	H1-3	Human	mass spectrometry studies of complexes	MI:0069	23637410
IBV	N	RPS29	Human	mass spectrometry studies of complexes	MI:0069	23637410
IBV	N	GSK3A	Human	mass spectrometry studies of complexes	MI:0069	23637410
IBV	N	RPS15A	Human	mass spectrometry studies of complexes	MI:0069	23637410
IBV	N	RPL13A	Human	mass spectrometry studies of complexes	MI:0069	23637410
IBV	N	RPS15	Human	mass spectrometry studies of complexes	MI:0069	23637410
IBV	N	RPL23	Human	mass spectrometry studies of complexes	MI:0069	23637410
IBV	N	RPL22L1	Human	mass spectrometry studies of complexes	MI:0069	23637410
IBV	N	RPL7	Human	mass spectrometry studies of complexes	MI:0069	23637410
IBV	N	RPL18A	Human	mass spectrometry studies of complexes	MI:0069	23637410
IBV	N	RPL10	Human	mass spectrometry studies of complexes	MI:0069	23637410
IBV	N	RPS7	Human	mass spectrometry studies of complexes	MI:0069	23637410
IBV	N	RPS4	Human	mass spectrometry studies of complexes	MI:0069	23637410
IBV	N	NCL	Human	mass spectrometry studies of complexes	MI:0069	23637410
IBV	N	RPL21	Human	mass spectrometry studies of complexes	MI:0069	23637410
IBV	N	RPL17	Human	mass spectrometry studies of complexes	MI:0069	23637410
IBV	N	RPS24	Human	mass spectrometry studies of complexes	MI:0069	23637410
IBV	N	DDX5	Human	mass spectrometry studies of complexes	MI:0069	23637410
IBV	N	RPL8	Human	mass spectrometry studies of complexes	MI:0069	23637410
IBV	N	HNRNPA0	Human	mass spectrometry studies of complexes	MI:0069	23637410
IBV	N	RTRAF	Human	mass spectrometry studies of complexes	MI:0069	23637410
IBV	N	RPL3	Human	mass spectrometry studies of complexes	MI:0069	23637410
IBV	N	RBM3	Human	mass spectrometry studies of complexes	MI:0069	23637410
IBV	N	USP10	Human	mass spectrometry studies of complexes	MI:0069	23637410
IBV	N	RPL27A	Human	mass spectrometry studies of complexes	MI:0069	23637410
IBV	N	XRCC6	Human	mass spectrometry studies of complexes	MI:0069	23637410
IBV	N	DDX21	Human	mass spectrometry studies of complexes	MI:0069	23637410
IBV	N	RPL9	Human	mass spectrometry studies of complexes	MI:0069	23637410
IBV	N	NONO	Human	mass spectrometry studies of complexes	MI:0069	23637410
IBV	N	SRSF1	Human	mass spectrometry studies of complexes	MI:0069	23637410
IBV	N	RPL27	Human	mass spectrometry studies of complexes	MI:0069	23637410
IBV	N	SFPQ	Human	mass spectrometry studies of complexes	MI:0069	23637410
IBV	N	HNRNPD	Human	mass spectrometry studies of complexes	MI:0069	23637410
IBV	N	RPL10A	Human	mass spectrometry studies of complexes	MI:0069	23637410
IBV	N	RPL23A	Human	mass spectrometry studies of complexes	MI:0069	23637410
IBV	N	DDX1	Human	mass spectrometry studies of complexes	MI:0069	23637410
IBV	N	XRCC5	Human	mass spectrometry studies of complexes	MI:0069	23637410
IBV	N	HNRNPAB	Human	mass spectrometry studies of complexes	MI:0069	23637410
IBV	N	SSB	Human	mass spectrometry studies of complexes	MI:0069	23637410
IBV	N	RPL5	Human	mass spectrometry studies of complexes	MI:0069	23637410
IBV	N	HNRNPA1	Human	mass spectrometry studies of complexes	MI:0069	23637410
IBV	N	GSK3B	Human	mass spectrometry studies of complexes	MI:0069	23637410
IBV	N	RTCB	Human	mass spectrometry studies of complexes	MI:0069	23637410
IBV	N	RPL0	Human	mass spectrometry studies of complexes	MI:0069	23637410
IBV	N	RPL14	Human	mass spectrometry studies of complexes	MI:0069	23637410
IBV	N	SRSF2	Human	mass spectrometry studies of complexes	MI:0069	23637410
IBV	N	SYNCRIP	Human	mass spectrometry studies of complexes	MI:0069	23637410
IBV	N	YBX3	Human	mass spectrometry studies of complexes	MI:0069	23637410
IBV	N	RPL30	Human	mass spectrometry studies of complexes	MI:0069	23637410
IBV	N	DDX3X	Human	mass spectrometry studies of complexes	MI:0069	23637410
IBV	N	RPL11	Human	mass spectrometry studies of complexes	MI:0069	23637410
IBV	N	DDX17	Human	mass spectrometry studies of complexes	MI:0069	23637410
IBV	N	DHX9	Human	mass spectrometry studies of complexes	MI:0069	23637410
IBV	N	FAM98A	Human	mass spectrometry studies of complexes	MI:0069	23637410
IBV	N	HNRNPA3	Human	mass spectrometry studies of complexes	MI:0069	23637410
IBV	N	PABPC1	Human	mass spectrometry studies of complexes	MI:0069	23637410
IBV	N	DHX30	Human	mass spectrometry studies of complexes	MI:0069	23637410
IBV	N	HNRNPU	Human	mass spectrometry studies of complexes	MI:0069	23637410
IBV	N	FUS	Human	mass spectrometry studies of complexes	MI:0069	23637410
IBV	N	SNRPD3	Human	mass spectrometry studies of complexes	MI:0069	23637410
IBV	N	RPL12	Human	mass spectrometry studies of complexes	MI:0069	23637410
IBV	N	SERBP1	Human	mass spectrometry studies of complexes	MI:0069	23637410
IBV	N	BLM	Human	mass spectrometry studies of complexes	MI:0069	23637410
IBV	N	RPSA	Human	mass spectrometry studies of complexes	MI:0069	23637410
IBV	N	HNRNPR	Human	mass spectrometry studies of complexes	MI:0069	23637410
IBV	N	HNRNPA2B1	Human	mass spectrometry studies of complexes	MI:0069	23637410
IBV	N	NPM1	Human	mass spectrometry studies of complexes	MI:0069	23637410
IBV	N	RPLP1	Human	mass spectrometry studies of complexes	MI:0069	23637410
IBV	N	LARP1	Human	mass spectrometry studies of complexes	MI:0069	23637410
IBV	N	RBM14	Human	mass spectrometry studies of complexes	MI:0069	23637410
IBV	N	SRSF7	Human	mass spectrometry studies of complexes	MI:0069	23637410
IBV	N	YTHDF2	Human	mass spectrometry studies of complexes	MI:0069	23637410
IBV	N	RACK1	Human	mass spectrometry studies of complexes	MI:0069	23637410
IBV	N	RBMX	Human	mass spectrometry studies of complexes	MI:0069	23637410
IBV	N	IGF2BP1	Human	mass spectrometry studies of complexes	MI:0069	23637410
IBV	N	PTBP1	Human	mass spectrometry studies of complexes	MI:0069	23637410
IBV	N	PABPC4	Human	mass spectrometry studies of complexes	MI:0069	23637410
IBV	N	DHX36	Human	mass spectrometry studies of complexes	MI:0069	23637410
IBV	N	MOV10	Human	mass spectrometry studies of complexes	MI:0069	23637410
IBV	N	DHX57	Human	mass spectrometry studies of complexes	MI:0069	23637410
IBV	N	H1-10	Human	mass spectrometry studies of complexes	MI:0069	23637410
IBV	N	ATXN2L	Human	mass spectrometry studies of complexes	MI:0069	23637410
IBV	N	FMR1	Human	mass spectrometry studies of complexes	MI:0069	23637410
IBV	N	DHX15	Human	mass spectrometry studies of complexes	MI:0069	23637410
IBV	N	HNRNPH1	Human	mass spectrometry studies of complexes	MI:0069	23637410
IBV	N	HNRNPF	Human	mass spectrometry studies of complexes	MI:0069	23637410
IBV	N	H2AX	Human	mass spectrometry studies of complexes	MI:0069	23637410
IBV	N	HNRNPK	Human	mass spectrometry studies of complexes	MI:0069	23637410
IBV	N	ILF2	Human	mass spectrometry studies of complexes	MI:0069	23637410
IBV	N	DDX6	Human	mass spectrometry studies of complexes	MI:0069	23637410
IBV	N	LRRC59	Human	mass spectrometry studies of complexes	MI:0069	23637410
IBV	N	HNRNPM	Human	mass spectrometry studies of complexes	MI:0069	23637410
IBV	N	HDLBP	Human	mass spectrometry studies of complexes	MI:0069	23637410
IBV	N	HNRNPH3	Human	mass spectrometry studies of complexes	MI:0069	23637410
IBV	N	PARP1	Human	mass spectrometry studies of complexes	MI:0069	23637410
IBV	N	ELAVL1	Human	mass spectrometry studies of complexes	MI:0069	23637410
IBV	N	HNRNPC	Human	mass spectrometry studies of complexes	MI:0069	23637410
IBV	N	ILF3	Human	mass spectrometry studies of complexes	MI:0069	23637410
IBV	N	MYL6	Human	mass spectrometry studies of complexes	MI:0069	23637410
IBV	N	RPS27A	Human	mass spectrometry studies of complexes	MI:0069	23637410
IBV	N	ZCCHC3	Human	mass spectrometry studies of complexes	MI:0069	23637410
IBV	N	HNRNPDL	Human	mass spectrometry studies of complexes	MI:0069	23637410
IBV	N	LRPPRC	Human	mass spectrometry studies of complexes	MI:0069	23637410
IBV	N	MYH9	Human	mass spectrometry studies of complexes	MI:0069	23637410
IBV	N	IGF2BP3	Human	mass spectrometry studies of complexes	MI:0069	23637410
IBV	N	HNRNPL	Human	mass spectrometry studies of complexes	MI:0069	23637410
IBV	N	SND1	Human	mass spectrometry studies of complexes	MI:0069	23637410
IBV	N	UPF1	Human	mass spectrometry studies of complexes	MI:0069	23637410
IBV	N	RPL19	African Green Monkey	confocal microscopy	MI:0663	23637410
IBV	N	PABPC1	African Green Monkey	confocal microscopy	MI:0663	23637410
IBV	N	G3BP1	Human	confocal microscopy	MI:0663	23637410
IBV	N	G3BP2	Human	confocal microscopy	MI:0663	23637410
IBV	N	NPM1	Human	pull down	MI:0096	23637410
IBV	N	HNRNPA1	Human	pull down	MI:0096	23637410
IBV	N	HNRNPA2B1	Human	pull down	MI:0096	23637410
IBV	N	GSK3A	Human	pull down	MI:0096	23637410
IBV	N	GSK3B	Human	pull down	MI:0096	23637410
IBV	N	NONO	Human	pull down	MI:0096	23637410
IBV	N	PABPC1	Human	pull down	MI:0096	23637410
SARS-CoV	NSP3	RCHY1	Human	mass spectrometry studies of complexes	MI:0069	27519799
SARS-CoV	NSP3	RCHY1	Human	3 hybrid method	MI:0588	27519799
SARS-CoV	NSP3	RCHY1	Human	bimolecular fluorescence complementation	MI:0809	27519799
SARS-CoV	NSP3	RCHY1	Human	anti tag coimmunoprecipitation	MI:0007	27519799
SARS-CoV	NSP3	CAMK2D	Human	mass spectrometry studies of complexes	MI:0069	27519799
SARS-CoV	NSP3	CAMK2D	Human	bimolecular fluorescence complementation	MI:0809	27519799
SARS-CoV	NSP3	CAMK2D	Human	anti tag coimmunoprecipitation	MI:0007	27519799
MERS-CoV	NSP3	RCHY1	Human	bimolecular fluorescence complementation	MI:0809	27519799
MERS-CoV	NSP3	RCHY1	Human	anti tag coimmunoprecipitation	MI:0007	27519799
HCoV-NL63	NSP3	RCHY1	Human	bimolecular fluorescence complementation	MI:0809	27519799
HCoV-NL63	NSP3	RCHY1	Human	anti tag coimmunoprecipitation	MI:0007	27519799
MERS-CoV	ORF4A	PRKRA	Human	anti tag coimmunoprecipitation	MI:0007	24522921
MERS-CoV	ORF4B	IFIH1	Human	anti tag coimmunoprecipitation	MI:0007	26631542
MERS-CoV	ORF4B	TBK1	Human	anti tag coimmunoprecipitation	MI:0007	26631542
MERS-CoV	ORF4B	IKBKE	Human	anti tag coimmunoprecipitation	MI:0007	26631542
MERS-CoV	ORF4B	IFIH1	Human	confocal microscopy	MI:0663	26631542
MERS-CoV	ORF4B	TBK1	Human	confocal microscopy	MI:0663	26631542
MERS-CoV	ORF4B	IKBKE	Human	confocal microscopy	MI:0663	26631542
PEDV	NSP5	IKBKG	Pig	protease assay	MI:0435	26656704
PEDV	NSP5	IKBKG	Human	protease assay	MI:0435	26656704
MERS-CoV	ORF4B	KPNA3	Human	anti tag coimmunoprecipitation	MI:0007	29370303
MERS-CoV	ORF4B	KPNA4	Human	anti tag coimmunoprecipitation	MI:0007	29370303
SARS-CoV	M	SSR3	Human	confocal microscopy	MI:0663	26861016
SARS-CoV	NSP3	ISG15	Human	x-ray crystallography	MI:0114	28438633
SARS-CoV	NSP3	ISG15	Mouse	x-ray crystallography	MI:0114	28438633
SARS-CoV	NSP3	ISG15	Human	enzymatic study	MI:0415	28438633
SARS-CoV	NSP3	ISG15	Mouse	enzymatic study	MI:0415	28438633
MERS-CoV	NSP3	ISG15	Human	enzymatic study	MI:0415	28438633
MERS-CoV	NSP3	ISG15	Mouse	enzymatic study	MI:0415	28438633
MHV	NSP3	ISG15	Mouse	enzymatic study	MI:0415	28438633
SARS-CoV	ORF6	KPNA2	Human	coimmunoprecipitation	MI:0019	17596301
SARS-CoV	ORF6	KPNB1	Human	coimmunoprecipitation	MI:0019	17596301
SARS-CoV	ORF6	KPNA2	Human	fluorescence microscopy	MI:0416	17596301
SARS-CoV	ORF6	KPNB1	Human	fluorescence microscopy	MI:0416	17596301
SARS-CoV	N	PPIA	Human	surface plasmon resonance	MI:0107	15688292
SARS-CoV	N	PPIA	Human	coimmunoprecipitation	MI:0019	15688292
SARS-CoV	ORF7A	BCL2L1	Human	anti tag coimmunoprecipitation	MI:0007	17428862
SARS-CoV	ORF7A	BCL2L2	Human	anti tag coimmunoprecipitation	MI:0007	17428862
SARS-CoV	ORF7A	MCL1	Human	anti tag coimmunoprecipitation	MI:0007	17428862
SARS-CoV	ORF7A	BCL2A1	Human	anti tag coimmunoprecipitation	MI:0007	17428862
SARS-CoV	ORF7A	BCL2	Human	anti tag coimmunoprecipitation	MI:0007	17428862
SARS-CoV	ORF7A	BCL2L1	Human	coimmunoprecipitation	MI:0019	17428862
SARS-CoV	NSP10	IFTAP	Human	two hybrid	MI:0018	18433331
SARS-CoV	NSP10	IFTAP	Human	validated two hybrid	MI:1356	18433331
SARS-CoV	NSP5	ATP6V1G1	Human	anti tag coimmunoprecipitation	MI:0007	16226257
SARS-CoV	NSP5	ATP6V1G1	Human	enzyme linked immunosorbent assay	MI:0411	16226257
SARS-CoV	NSP5	ATP6V1G1	Human	phage display	MI:0084	16226257
SARS-CoV	NSP5	ATP6V1G1	Human	cleavage assay	MI:0990	16226257
SARS-CoV	N	HNRNPA1	Human	pull down	MI:0096	15862300
SARS-CoV	N	HNRNPA1	Human	surface plasmon resonance	MI:0107	15862300
SARS-CoV	N	HNRNPA1	Human	two hybrid	MI:0018	15862300
SARS-CoV	ORF7A	SGTA	Human	two hybrid	MI:0018	16580632
SARS-CoV	ORF7A	SGTA	Human	anti tag coimmunoprecipitation	MI:0007	16580632
SARS-CoV	ORF7A	SGTA	Human	anti bait coimmunoprecipitation	MI:0006	16580632
SARS-CoV	ORF7A	SGTA	Human	fluorescence microscopy	MI:0416	16580632
SARS-CoV	N	UBE2I	Human	two hybrid	MI:0018	17037517
SARS-CoV	N	UBE2I	Human	anti tag coimmunoprecipitation	MI:0007	17037517
SARS-CoV	N	UBE2I	Human	pull down	MI:0096	17037517
SARS-CoV	N	UBE2I	Human	fluorescence microscopy	MI:0416	17037517
SARS-CoV	M	IKBKB	Human	coimmunoprecipitation	MI:0019	17705188
SARS-CoV	ORF3A	CAV1	Human	cosedimentation through density gradient	MI:0029	17947532
SARS-CoV	ORF3A	CAV1	Human	fluorescence microscopy	MI:0416	17947532
SARS-CoV	ORF3A	CAV1	Human	two hybrid	MI:0018	17947532
SARS-CoV	ORF3A	CAV1	Human	fluorescent resonance energy transfer	MI:0055	17947532
SARS-CoV	NSP3	IRF3	Human	anti tag coimmunoprecipitation	MI:0007	17761676
SARS-CoV	E	BCL2L1	Human	pull down	MI:0096	16048439
SARS-CoV	E	BCL2L1	Human	coimmunoprecipitation	MI:0019	16048439
SARS-CoV	E	BCL2L1	Human	competition binding	MI:0405	16048439
SARS-CoV	N	EEF1A1	Human	two hybrid	MI:0018	18448518
SARS-CoV	N	EEF1A1	Human	anti tag coimmunoprecipitation	MI:0007	18448518
SARS-CoV	N	EEF1A1	Human	pull down	MI:0096	18448518
SARS-CoV	N	EEF1A1	Human	surface plasmon resonance	MI:0107	18448518
SARS-CoV	S	SFTPD	Human	enzyme linked immunosorbent assay	MI:0411	17412287
SARS-CoV	M	DDX58	Human	coimmunoprecipitation	MI:0019	19380580
SARS-CoV	M	TBK1	Human	coimmunoprecipitation	MI:0019	19380580
SARS-CoV	M	IKBKE	Human	coimmunoprecipitation	MI:0019	19380580
SARS-CoV	M	TRAF3	Human	coimmunoprecipitation	MI:0019	19380580
SARS-CoV	M	IKBKE	Human	fluorescence microscopy	MI:0416	19380580
SARS-CoV	M	TRAF3	Human	fluorescence microscopy	MI:0416	19380580
PDCoV	ORF6	DDX58	Human	anti tag coimmunoprecipitation	MI:0007	29769346
PDCoV	ORF6	IFIH1	Human	anti tag coimmunoprecipitation	MI:0007	29769346
SARS-CoV	NSP15	RB1	Human	coimmunoprecipitation	MI:0019	22301153
SARS-CoV	NSP15	RB1	Human	pull down	MI:0096	22301153
SARS-CoV	NSP15	RB1	Human	fluorescence microscopy	MI:0416	22301153
IBV	NSP14	DDX1	Human	two hybrid array	MI:0397	20573827
IBV	NSP14	DDX1	Human	anti tag coimmunoprecipitation	MI:0007	20573827
IBV	NSP14	DDX1	African Green Monkey	coimmunoprecipitation	MI:0019	20573827
IBV	NSP14	DDX1	Human	confocal microscopy	MI:0663	20573827
SARS-CoV	NSP14	DDX1	Human	anti tag coimmunoprecipitation	MI:0007	20573827
MHV	N	HNRNPA1	Mouse	pull down	MI:0096	10603321
MHV	N	HNRNPA1	Mouse	anti bait coimmunoprecipitation	MI:0006	10603321
MHV	N	HNRNPA1	Mouse	competition binding	MI:0405	10603321
MHV	N	HNRNPA1	Mouse	fluorescence microscopy	MI:0416	10603321
MHV	N	HNRNPA1	Mouse	coimmunoprecipitation	MI:0019	10603321
MHV	N	HNRNPA1	Mouse	two hybrid	MI:0018	10603321
SARS-CoV	N	PRKRA	Human	coimmunoprecipitation	MI:0019	28591694
MHV	N	PRKRA	Human	coimmunoprecipitation	MI:0019	28591694
SARS-CoV	N	PRKRA	Human	fluorescence microscopy	MI:0416	28591694
MHV	N	PRKRA	Human	fluorescence microscopy	MI:0416	28591694
SARS-CoV	N	PRKRA	Human	competition binding	MI:0405	28591694
MHV	N	PRKRA	Human	competition binding	MI:0405	28591694
MHV	N	TUBB	Mouse	fluorescence microscopy	MI:0416	28566289
MHV	N	TUBB	Mouse	coimmunoprecipitation	MI:0019	28566289
SARS-CoV	NSP6	NPIPB3	Human	phage display	MI:0084	26320399
SARS-CoV	NSP6	NPIPB3	Human	coimmunoprecipitation	MI:0019	26320399
SARS-CoV	NSP6	NPIPB3	Human	fluorescence microscopy	MI:0416	26320399
SARS-CoV	NSP6	CCNL1	Human	phage display	MI:0084	26320399
SARS-CoV	NSP6	RBMXL2	Human	phage display	MI:0084	26320399
TGEV	ORF7	PPP1CA	Pig	anti bait coimmunoprecipitation	MI:0006	21695242
TGEV	ORF7	EIF2A	Pig	anti bait coimmunoprecipitation	MI:0006	21695242
TGEV	ORF7	PPP1CA	Pig	competition binding	MI:0405	21695242
MHV	NSP3	TBK1	Mouse	anti tag coimmunoprecipitation	MI:0007	21364999
MHV	NSP3	TBK1	Mouse	enzymatic study	MI:0415	21364999
MHV	NSP3	IRF3	Human	anti tag coimmunoprecipitation	MI:0007	18957937
HCoV-NL63	NSP3	STING1	Human	anti tag coimmunoprecipitation	MI:0007	22312431
HCoV-NL63	NSP3	STING1	Human	fluorescence microscopy	MI:0416	22312431
HCoV-NL63	NSP3	STING1	Human	competition binding	MI:0405	22312431
SARS-CoV	NSP3	STING1	Human	anti tag coimmunoprecipitation	MI:0007	22312431
SARS-CoV	NSP3	STING1	Human	competition binding	MI:0405	22312431
PEDV	N	TBK1	Human	anti tag coimmunoprecipitation	MI:0007	24872591
PEDV	N	TBK1	Human	anti bait coimmunoprecipitation	MI:0006	24872591
PEDV	N	TBK1	Human	fluorescence microscopy	MI:0416	24872591
PEDV	N	IKBKE	Human	anti tag coimmunoprecipitation	MI:0007	24872591
SARS-CoV	ORF9B	MAVS	Human	coimmunoprecipitation	MI:0019	25135833
SARS-CoV	ORF9B	MAVS	Human	electron microscopy	MI:0040	25135833
SARS-CoV	ORF9B	DNM1L	Human	coimmunoprecipitation	MI:0019	25135833
SARS-CoV	ORF9B	PCBP2	Human	coimmunoprecipitation	MI:0019	25135833
SARS-CoV	ORF9B	XPO1	Human	coimmunoprecipitation	MI:0019	21637748
SARS-CoV	N	GSK3A	Human	anti tag coimmunoprecipitation	MI:0007	19106108
SARS-CoV	N	GSK3B	Human	anti tag coimmunoprecipitation	MI:0007	19106108
SARS-CoV	N	GSK3A	Human	protein kinase assay	MI:0424	19106108
SARS-CoV	N	GSK3B	Human	protein kinase assay	MI:0424	19106108
IBV	N	NCL	African Green Monkey	pull down	MI:0096	11967337
IBV	M	ACTB	Human	two hybrid	MI:0018	19287488
IBV	M	ACTB	Human	anti tag coimmunoprecipitation	MI:0007	19287488
IBV	M	ACTB	Human	fluorescence microscopy	MI:0416	19287488
IBV	NSP13	POLD1	Human	two hybrid	MI:0018	21918226
IBV	NSP13	POLD1	Human	pull down	MI:0096	21918226
IBV	NSP13	POLD1	Human	anti bait coimmunoprecipitation	MI:0006	21918226
IBV	NSP13	POLD1	African Green Monkey	anti bait coimmunoprecipitation	MI:0006	21918226
SARS-CoV	NSP13	POLD1	Human	pull down	MI:0096	21918226
SARS-CoV	NSP13	POLD1	Human	anti bait coimmunoprecipitation	MI:0006	21918226
SARS-CoV	E	SDCBP	Human	two hybrid	MI:0018	25122212
SARS-CoV	E	SDCBP	Human	anti bait coimmunoprecipitation	MI:0006	25122212
SARS-CoV	E	SDCBP	Human	coimmunoprecipitation	MI:0019	25122212
SARS-CoV	E	SDCBP	Human	confocal microscopy	MI:0663	25122212
SARS-CoV	N	PPIA	Human	surface plasmon resonance array	MI:0921	15358143
SARS-CoV	E	MPP5	Human	anti tag coimmunoprecipitation	MI:0007	20861307
SARS-CoV	E	MPP5	Human	two hybrid	MI:0018	20861307
SARS-CoV	E	MPP5	Human	pull down	MI:0096	20861307
SARS-CoV	ORF8AB	ATF6	Human	confocal microscopy	MI:0663	19304306
SARS-CoV	ORF8AB	ATF6	Human	anti tag coimmunoprecipitation	MI:0007	19304306
SARS-CoV	ORF8B	IRF3	Human	anti tag coimmunoprecipitation	MI:0007	29294448
SARS-CoV	ORF8AB	IRF3	Human	anti tag coimmunoprecipitation	MI:0007	29294448
SARS-CoV	ORF8B	IRF3	Human	coimmunoprecipitation	MI:0019	29294448
SARS-CoV	ORF8AB	IRF3	Human	coimmunoprecipitation	MI:0019	29294448
SARS-CoV	NSP3	UBB	Human	x-ray crystallography	MI:0114	24854014
SARS-CoV	NSP3	ISG15	Human	ubiquitinase assay	MI:0997	24854014
SARS-CoV	NSP2	PHB	Human	anti tag coimmunoprecipitation	MI:0007	19640993
SARS-CoV	NSP2	PHB2	Human	anti tag coimmunoprecipitation	MI:0007	19640993
SARS-CoV	NSP1	DIDO1	Human	mass spectrometry studies of complexes	MI:0069	19640993
SARS-CoV	NSP1	USP7	Human	mass spectrometry studies of complexes	MI:0069	19640993
SARS-CoV	NSP1	CKAP5	Human	mass spectrometry studies of complexes	MI:0069	19640993
SARS-CoV	NSP1	RFC2	Human	mass spectrometry studies of complexes	MI:0069	19640993
SARS-CoV	NSP1	CPNE3	Human	mass spectrometry studies of complexes	MI:0069	19640993
SARS-CoV	NSP1	RPP38	Human	mass spectrometry studies of complexes	MI:0069	19640993
SARS-CoV	NSP1	SNRNP48	Human	mass spectrometry studies of complexes	MI:0069	19640993
SARS-CoV	NSP2	GIGYF2	Human	mass spectrometry studies of complexes	MI:0069	19640993
SARS-CoV	NSP2	PHB	Human	mass spectrometry studies of complexes	MI:0069	19640993
SARS-CoV	NSP2	VDAC1	Human	mass spectrometry studies of complexes	MI:0069	19640993
SARS-CoV	NSP2	EIF4E2	Human	mass spectrometry studies of complexes	MI:0069	19640993
SARS-CoV	NSP2	PHB2	Human	mass spectrometry studies of complexes	MI:0069	19640993
SARS-CoV	NSP2	PCM1	Human	mass spectrometry studies of complexes	MI:0069	19640993
SARS-CoV	NSP2	SPEN	Human	mass spectrometry studies of complexes	MI:0069	19640993
SARS-CoV	NSP2	KMT2D	Human	mass spectrometry studies of complexes	MI:0069	19640993
SARS-CoV	NSP2	SLC1A5	Human	mass spectrometry studies of complexes	MI:0069	19640993
SARS-CoV	NSP2	EIF3M	Human	mass spectrometry studies of complexes	MI:0069	19640993
SARS-CoV	NSP2	STOML2	Human	mass spectrometry studies of complexes	MI:0069	19640993
PEDV	N	HNRNPA1	African Green Monkey	fluorescence microscopy	MI:0416	29534017
PEDV	N	HNRNPA1	Human	anti tag coimmunoprecipitation	MI:0007	29534017
TGEV	N	DHX9	Pig	detection by mass spectrometry	MI:0943	25533531
TGEV	N	HNRNPU	Pig	detection by mass spectrometry	MI:0943	25533531
TGEV	N	ACTN4	Pig	detection by mass spectrometry	MI:0943	25533531
TGEV	N	VIM	Pig	detection by mass spectrometry	MI:0943	25533531
TGEV	N	EEF1A1	Pig	detection by mass spectrometry	MI:0943	25533531
TGEV	N	VASH1	Pig	detection by mass spectrometry	MI:0943	25533531
TGEV	N	RPS9	Pig	detection by mass spectrometry	MI:0943	25533531
TGEV	N	DDX1	Pig	detection by mass spectrometry	MI:0943	25533531
TGEV	N	RPL26	Pig	detection by mass spectrometry	MI:0943	25533531
TGEV	N	RPS13	Pig	detection by mass spectrometry	MI:0943	25533531
TGEV	N	MYH9	Pig	mass spectrometry studies of complexes	MI:0069	25533531
TGEV	N	MYH10	Pig	mass spectrometry studies of complexes	MI:0069	25533531
TGEV	N	HNRNPU	Pig	mass spectrometry studies of complexes	MI:0069	25533531
TGEV	N	ACTN4	Pig	mass spectrometry studies of complexes	MI:0069	25533531
TGEV	N	VIM	Pig	mass spectrometry studies of complexes	MI:0069	25533531
TGEV	N	VIM	Pig	coimmunoprecipitation	MI:0019	25533531
TGEV	N	VIM	Pig	confocal microscopy	MI:0663	25533531
TGEV	NSP14	DDX1	Pig	anti tag coimmunoprecipitation	MI:0007	28848548
TGEV	NSP14	DDX1	Pig	fluorescence microscopy	MI:0416	28848548
TGEV	M	EIF4A2	Pig	two hybrid	MI:0018	30583231
TGEV	M	EIF4A2	Pig	pull down	MI:0096	30583231
TGEV	M	EIF4A2	Pig	coimmunoprecipitation	MI:0019	30583231
TGEV	M	EIF4A2	Pig	fluorescence microscopy	MI:0416	30583231
TGEV	N	EEF1A1	Pig	pull down	MI:0096	24974120
TGEV	N	EEF1A1	Pig	coimmunoprecipitation	MI:0019	24974120
TGEV	N	EEF1A1	Pig	confocal microscopy	MI:0663	24974120
TGEV	N	TFRC	Pig	coimmunoprecipitation	MI:0019	30342530
TGEV	S	TFRC	Human	anti tag coimmunoprecipitation	MI:0007	30342530
SARS-CoV	M	DDX58	Human	anti tag coimmunoprecipitation	MI:0007	24509444
SARS-CoV	M	TRAF3	Human	anti tag coimmunoprecipitation	MI:0007	24509444
SARS-CoV	M	IKBKE	Human	anti tag coimmunoprecipitation	MI:0007	24509444
SARS-CoV	M	TBK1	Human	anti tag coimmunoprecipitation	MI:0007	24509444
HCoV-HKU1	M	TRAF3	Human	confocal microscopy	MI:0663	24509444
SARS-CoV	M	TRAF3	Human	confocal microscopy	MI:0663	24509444
HCoV-NL63	N	APOBEC3C	Human	anti tag coimmunoprecipitation	MI:0007	29654310
HCoV-NL63	N	APOBEC3F	Human	anti tag coimmunoprecipitation	MI:0007	29654310
HCoV-NL63	N	APOBEC3H	Human	anti tag coimmunoprecipitation	MI:0007	29654310
HCoV-NL63	N	APOBEC3C	Human	confocal microscopy	MI:0663	29654310
HCoV-OC43	N	HNRNPU	Human	detection by mass spectrometry	MI:0943	24109243
HCoV-OC43	N	NCL	Human	detection by mass spectrometry	MI:0943	24109243
HCoV-OC43	N	XRCC5	Human	detection by mass spectrometry	MI:0943	24109243
HCoV-OC43	N	XRCC6	Human	detection by mass spectrometry	MI:0943	24109243
HCoV-OC43	N	PABPC1	Human	detection by mass spectrometry	MI:0943	24109243
HCoV-OC43	N	HSPA1A	Human	detection by mass spectrometry	MI:0943	24109243
HCoV-OC43	N	YBX1	Human	detection by mass spectrometry	MI:0943	24109243
HCoV-OC43	N	HNRNPA1	Human	detection by mass spectrometry	MI:0943	24109243
HCoV-OC43	N	H1-2	Human	detection by mass spectrometry	MI:0943	24109243
HCoV-OC43	N	RPL26	Human	detection by mass spectrometry	MI:0943	24109243
HCoV-OC43	N	RPS19	Human	detection by mass spectrometry	MI:0943	24109243
TGEV	S	ANPEP	Pig	x-ray crystallography	MI:0114	22876187
PRCV	S	ANPEP	Pig	x-ray crystallography	MI:0114	22876187
HCoV-229E	S	ANPEP	Human	x-ray crystallography	MI:0114	29170370
HCoV-NL63	S	ACE2	Human	x-ray crystallography	MI:0114	19901337
MHV	S	CEACAM1	Mouse	x-ray crystallography	MI:0114	32150576
MHV	S	CEACAM1	Mouse	x-ray crystallography	MI:0114	21670291
SARS-CoV-2	S	ACE2	Human	x-ray crystallography	MI:0114	32225176
SARS-CoV-2	S	ACE2	Human	x-ray crystallography	MI:0114	32275855
SARS-CoV	S	ACE2	Human	3D electron microscopy	MI:0410	30102747
PEDV	S	ANPEP	Pig	fluorescence-activated cell sorting	MI:0054	26907329
PEDV	S	ANPEP	Pig	enzyme linked immunosorbent assay	MI:0411	26907329
PEDV	S	ANPEP	Pig	pull down	MI:0096	26907329
PEDV	S	ANPEP	Pig	protein array	MI:0089	26907329
PDCov	N	IFIH1	Human	anti tag coimmunoprecipitation	MI:0007	31129785
PDCov	N	DDX58	Human	anti bait coimmunoprecipitation	MI:0006	31129785
PDCov	N	DDX58	Human	anti tag coimmunoprecipitation	MI:0007	31129785
PDCov	N	DDX58	Pig	coimmunoprecipitation	MI:0019	31129785
PDCov	N	DDX58	Pig	anti tag coimmunoprecipitation	MI:0007	31143181
PDCov	N	TRAF3	Pig	anti tag coimmunoprecipitation	MI:0007	31143181
MERS-CoV	S	DPP4	Human	x-ray crystallography	MI:0114	23835475
SARS-CoV	S	ACE2	Human	anti bait coimmunoprecipitation	MI:0006	14647384
SARS-CoV	S	ACE2	Human	anti bait coimmunoprecipitation	MI:0006	14670965
SARS-CoV	S	CD209	Human	fluorescence-activated cell sorting	MI:0054	15479853
SARS-CoV	S	CLEC4M	Human	fluorescence-activated cell sorting	MI:0054	15479853
SARS-CoV	S	ACE2	Human	anti tag coimmunoprecipitation	MI:0007	15791205
SARS-CoV	S	ACE2	Masked Palm Civet	anti tag coimmunoprecipitation	MI:0007	15791205
SARS-CoV	S	ACE2	Human	fluorescence-activated cell sorting	MI:0054	15791205
SARS-CoV	S	ACE2	Human	x-ray crystallography	MI:0114	18448527
SARS-CoV	S	ACE2	Masked Palm Civet	x-ray crystallography	MI:0114	18448527
SARS-CoV	S	TMPRSS2	Human	protease assay	MI:0435	21325420
SARS-CoV	S	EZR	Human	two hybrid	MI:0018	23185364
SARS-CoV	S	EZR	Human	pull down	MI:0096	23185364
SARS-CoV	S	EZR	Human	fluorescence technology	MI:0051	23185364
MERS-CoV	S	TMPRSS2	Human	cleavage assay	MI:0990	23468491
MERS-CoV	S	DPP4	Human	anti bait coimmunoprecipitation	MI:0006	23486063
HCoV-229E	S	TMPRSS2	Human	protease assay	MI:0435	23536651
HCoV-229E	S	TMPRSS11D	Human	protease assay	MI:0435	23536651
MERS-CoV	S	DPP4	Human	surface plasmon resonance	MI:0107	23831647
SARS-CoV	S	ACE2	Human	surface plasmon resonance	MI:0107	23831647
MERS-CoV	S	DPP4	Human	x-ray crystallography	MI:0114	23831647
MERS-CoV	S	DPP4	Human	anti tag coimmunoprecipitation	MI:0007	25114257
SARS-CoV	S	TMPRSS11E	Human	cleavage assay	MI:0990	25122802
MERS-CoV	S	TMPRSS13	Human	cleavage assay	MI:0990	25122802
SARS-CoV	S	TMPRSS11E	Human	protease assay	MI:0435	25122802
MERS-CoV	S	TMPRSS13	Human	protease assay	MI:0435	25122802
MERS-CoV	S	TMPRSS2	Human	cleavage assay	MI:0990	25122802
MERS-CoV	S	TMPRSS11D	Human	cleavage assay	MI:0990	25122802
MERS-CoV	S	CORIN	Human	cleavage assay	MI:0990	25122802
TGEV	S	FLNA	Pig	detection by mass spectrometry	MI:0943	25481285
TGEV	S	FLNA	Pig	imaging techniques	MI:0428	25481285
PEDV	S	ANPEP	Human	anti tag coimmunoprecipitation	MI:0007	25787280
PEDV	S	ANPEP	Pig	anti tag coimmunoprecipitation	MI:0007	25787280
TGEV	S	ANPEP	Human	anti tag coimmunoprecipitation	MI:0007	25787280
TGEV	S	ANPEP	Pig	anti tag coimmunoprecipitation	MI:0007	25787280
MERS-CoV	S	CEACAM5	Human	anti tag coimmunoprecipitation	MI:0007	27489282
MERS-CoV	S	CEACAM5	Human	coimmunoprecipitation	MI:0019	27489282
MERS-CoV	S	DPP4	Human	amplified luminescent proximity homogeneous assay	MI:0905	29669833
MERS-CoV	S	DPP4	Pipistrellus pipistrellus	amplified luminescent proximity homogeneous assay	MI:0905	29669833
MERS-CoV	S	DPP4	Human	protein array	MI:0089	29669833
MERS-CoV	S	DPP4	Pipistrellus pipistrellus	protein array	MI:0089	29669833
TGEV	S	EGFR	Pig	anti tag coimmunoprecipitation	MI:0007	29879540
MERS-CoV	S	HSPA5	Human	pull down	MI:0096	29887526
MERS-CoV	S	HSPA5	Human	anti tag coimmunoprecipitation	MI:0007	29887526
MERS-CoV	S	HSPA5	Human	coimmunoprecipitation	MI:0019	29887526
MERS-CoV	S	TMPRSS11A	Human	protease assay	MI:0435	29976755
TGEV	S	UBXN1	Pig	two hybrid	MI:0018	31029162
TGEV	S	UBXN1	Pig	pull down	MI:0096	31029162
TGEV	S	UBXN1	Pig	coimmunoprecipitation	MI:0019	31029162
MERS-CoV	S	DPP4	Pipistrellus pipistrellus	surface plasmon resonance	MI:0107	31776269
MERS-CoV	S	DPP4	Myotis brandtii	surface plasmon resonance	MI:0107	31776269
MERS-CoV	S	DPP4	Myotis davidii	surface plasmon resonance	MI:0107	31776269
MERS-CoV	S	DPP4	Myotis lucifugus	surface plasmon resonance	MI:0107	31776269
MERS-CoV	S	DPP4	Desmodus rotundus	surface plasmon resonance	MI:0107	31776269
MERS-CoV	S	DPP4	Pteropus alecto	surface plasmon resonance	MI:0107	31776269
MERS-CoV	S	DPP4	Pteropus vampyrus	surface plasmon resonance	MI:0107	31776269
MERS-CoV	S	DPP4	Human	surface plasmon resonance	MI:0107	31776269
MERS-CoV	S	DPP4	Myotis davidii	x-ray crystallography	MI:0114	31776269
SARS-CoV-2	S	ACE2	Human	surface plasmon resonance	MI:0107	32075877
SARS-CoV	S	ACE2	Human	surface plasmon resonance	MI:0107	32075877
SARS-CoV-2	S	ACE2	Human	transmission electron microscopy	MI:0020	32075877
SARS-CoV-2	S	ACE2	Human	antibody array	MI:0678	32142651
SARS-CoV-2	S	ACE2	Human	fluorescence technology	MI:0051	32203189
SARS-CoV-2	S	ACE2	Human	confocal microscopy	MI:0663	32203189
SARS-CoV-2	S	ACE2	Human	enzyme linked immunosorbent assay	MI:0411	32203189
SARS-CoV-2	S	ACE2	Human	competition binding	MI:0405	32203189
MERS-CoV	S	FURIN	Human	Protease assay	MI:0435	25288733
IBV	S	FURIN	Human	Protease assay	MI:0435	19553314
SARS-CoV	S	TMPRSS2	Human	Protease assay	MI:0435	21994442
SARS-CoV	S	TMPRSS11D	Human	Protease assay	MI:0435	21994442
SARS-CoV	S	CTSL	Human	Protease assay	MI:0435	18562523
SARS-CoV	ORF3A	TRAF2	Human	anti tag coimmunoprecipitation	MI:0007	31034780
SARS-CoV	ORF3A	TRAF3	Human	anti tag coimmunoprecipitation	MI:0007	31034780
SARS-CoV	ORF3A	TRAF6	Human	anti tag coimmunoprecipitation	MI:0007	31034780
SARS-CoV	ORF3A	PYCARD	Human	anti tag coimmunoprecipitation	MI:0007	31034780
SARS-CoV	ORF3A	TRAF3	Human	fluorescence microscopy	MI:0416	31034780
SARS-CoV	ORF3A	PYCARD	Human	fluorescence microscopy	MI:0416	31034780
SARS-CoV	NSP3	STING1	Human	anti tag coimmunoprecipitation	MI:0007	24622840
SARS-CoV	NSP3	IKBKE	Human	anti tag coimmunoprecipitation	MI:0007	24622840
SARS-CoV	NSP3	TBK1	Human	anti tag coimmunoprecipitation	MI:0007	24622840
SARS-CoV	NSP3	IRF3	Human	anti tag coimmunoprecipitation	MI:0007	24622840
SARS-CoV	NSP3	TRAF3	Human	anti tag coimmunoprecipitation	MI:0007	24622840
TGEV	S	TUBB2A	Human	anti tag coimmunoprecipitation	MI:0007	27479465
TGEV	S	TUBB6	Human	anti tag coimmunoprecipitation	MI:0007	27479465
TGEV	S	TUBB4A	Human	anti tag coimmunoprecipitation	MI:0007	27479465
TGEV	S	TUBA4A	Human	anti tag coimmunoprecipitation	MI:0007	27479465
HCoV-NL63	S	TUBB2A	Human	anti tag coimmunoprecipitation	MI:0007	27479465
HCoV-229E	S	TUBB2A	Human	anti tag coimmunoprecipitation	MI:0007	27479465
HCoV-229E	S	TUBB6	Human	anti tag coimmunoprecipitation	MI:0007	27479465
HCoV-229E	S	TUBB4A	Human	anti tag coimmunoprecipitation	MI:0007	27479465
HCoV-229E	S	TUBA4A	Human	anti tag coimmunoprecipitation	MI:0007	27479465
PEDV	S	CTSL	Human	Protease assay	MI:0435	27729455
PEDV	S	CTSB	Human	Protease assay	MI:0435	27729455
MERS-CoV	S	FURIN	Human	Protease assay	MI:0435	27999426
MHV	S	CTSB	Human	Protease assay	MI:0435	19706706
MHV	S	CTSL	Human	Protease assay	MI:0435	19706706

## Sheet: Table S2
VIRUS	VIRAL PROTEIN	CELLULAR PROTEIN (Uniprot)	HITS		Interactions reported multiple times across different publications were collapsed
SARS-CoV	S	ACE2	7		"HITS" indicates how many publications report the corresponding interaction
MERS-CoV	S	DPP4	6
SARS-CoV-2	S	ACE2	5
IBV	N	NCL	2
MERS-CoV	S	FURIN	2
MERS-CoV	S	TMPRSS2	2
MHV	NSP2	CEP85	2
MHV	NSP2	MARK2	2
MHV	NSP2	MARK3	2
MHV	S	CEACAM1	2
PDCov	N	DDX58	2
PEDV	S	ANPEP	2
SARS-CoV	M	DDX58	2
SARS-CoV	M	IKBKE	2
SARS-CoV	M	TBK1	2
SARS-CoV	M	TRAF3	2
SARS-CoV	N	PPIA	2
SARS-CoV	NSP3	IRF3	2
SARS-CoV	NSP3	ISG15	2
SARS-CoV	NSP3	STING1	2
SARS-CoV	S	TMPRSS2	2
TGEV	N	EEF1A1	2
TGEV	S	ANPEP	2
HCoV-229E	S	ANPEP	1
HCoV-229E	S	TMPRSS11D	1
HCoV-229E	S	TMPRSS2	1
HCoV-229E	S	TUBA4A	1
HCoV-229E	S	TUBB2A	1
HCoV-229E	S	TUBB4A	1
HCoV-229E	S	TUBB6	1
HCoV-HKU1	M	TRAF3	1
HCoV-NL63	N	APOBEC3C	1
HCoV-NL63	N	APOBEC3F	1
HCoV-NL63	N	APOBEC3H	1
HCoV-NL63	NSP3	RCHY1	1
HCoV-NL63	NSP3	STING1	1
HCoV-NL63	S	ACE2	1
HCoV-NL63	S	TUBB2A	1
HCoV-OC43	N	H1-2	1
HCoV-OC43	N	HNRNPA1	1
HCoV-OC43	N	HNRNPU	1
HCoV-OC43	N	HSPA1A	1
HCoV-OC43	N	NCL	1
HCoV-OC43	N	PABPC1	1
HCoV-OC43	N	RPL26	1
HCoV-OC43	N	RPS19	1
HCoV-OC43	N	XRCC5	1
HCoV-OC43	N	XRCC6	1
HCoV-OC43	N	YBX1	1
IBV	M	ACTB	1
IBV	N	ALYREF	1
IBV	N	ATXN2L	1
IBV	N	BLM	1
IBV	N	CAPRIN1	1
IBV	N	DDX1	1
IBV	N	DDX17	1
IBV	N	DDX21	1
IBV	N	DDX3X	1
IBV	N	DDX5	1
IBV	N	DDX6	1
IBV	N	DHX15	1
IBV	N	DHX30	1
IBV	N	DHX36	1
IBV	N	DHX57	1
IBV	N	DHX9	1
IBV	N	ELAVL1	1
IBV	N	FAM98A	1
IBV	N	FMR1	1
IBV	N	FUS	1
IBV	N	G3BP1	1
IBV	N	G3BP2	1
IBV	N	RACK1	1
IBV	N	GSK3A	1
IBV	N	GSK3B	1
IBV	N	H1-3	1
IBV	N	H1-10	1
IBV	N	H2AX	1
IBV	N	HDLBP	1
IBV	N	HNRNPA0	1
IBV	N	HNRNPA1	1
IBV	N	HNRNPA2B1	1
IBV	N	HNRNPA3	1
IBV	N	HNRNPAB	1
IBV	N	HNRNPC	1
IBV	N	HNRNPD	1
IBV	N	HNRNPF	1
IBV	N	RBMX	1
IBV	N	HNRNPH1	1
IBV	N	HNRNPH3	1
IBV	N	HNRNPK	1
IBV	N	HNRNPL	1
IBV	N	HNRNPM	1
IBV	N	SYNCRIP	1
IBV	N	HNRNPR	1
IBV	N	HNRNPU	1
IBV	N	HNRNPDL	1
IBV	N	IGF2BP1	1
IBV	N	IGF2BP3	1
IBV	N	ILF2	1
IBV	N	ILF3	1
IBV	N	LARP1	1
IBV	N	LRPPRC	1
IBV	N	LRRC59	1
IBV	N	MOV10	1
IBV	N	MYH9	1
IBV	N	MYL6	1
IBV	N	NONO	1
IBV	N	NPM1	1
IBV	N	PABPC1	1
IBV	N	PABPC4	1
IBV	N	PARP1	1
IBV	N	PTBP1	1
IBV	N	RBM14	1
IBV	N	RBM3	1
IBV	N	RPL0	1
IBV	N	RPL10	1
IBV	N	RPL10A	1
IBV	N	RPL11	1
IBV	N	RPL12	1
IBV	N	RPL13	1
IBV	N	RPL13A	1
IBV	N	RPL14	1
IBV	N	RPL15	1
IBV	N	RPL17	1
IBV	N	RPL18A	1
IBV	N	RPL19	1
IBV	N	RPL21	1
IBV	N	RPL22	1
IBV	N	RPL22L1	1
IBV	N	RPL23	1
IBV	N	RPL23A	1
IBV	N	RPL24	1
IBV	N	RPL26	1
IBV	N	RPL27	1
IBV	N	RPL27A	1
IBV	N	RPL3	1
IBV	N	RPL30	1
IBV	N	RPL31	1
IBV	N	RPL35	1
IBV	N	RPL4	1
IBV	N	RPL5	1
IBV	N	RPL7	1
IBV	N	RPL8	1
IBV	N	RPL9	1
IBV	N	RPLP1	1
IBV	N	RPS10	1
IBV	N	RPS11	1
IBV	N	RPS12	1
IBV	N	RPS13	1
IBV	N	RPS14	1
IBV	N	RPS15	1
IBV	N	RPS15A	1
IBV	N	RPS16	1
IBV	N	RPS17	1
IBV	N	RPS18	1
IBV	N	RPS19	1
IBV	N	RPS23	1
IBV	N	RPS24	1
IBV	N	RPS25	1
IBV	N	RPS26	1
IBV	N	RPS27A	1
IBV	N	RPS29	1
IBV	N	RPS3	1
IBV	N	RPS3A	1
IBV	N	RPS4	1
IBV	N	RPS5	1
IBV	N	RPS7	1
IBV	N	RPS8	1
IBV	N	RPS9	1
IBV	N	RPSA	1
IBV	N	RTCB	1
IBV	N	RTRAF	1
IBV	N	SERBP1	1
IBV	N	SFPQ	1
IBV	N	SRSF1	1
IBV	N	SRSF2	1
IBV	N	SRSF3	1
IBV	N	SRSF4	1
IBV	N	SRSF7	1
IBV	N	SND1	1
IBV	N	SNRPD3	1
IBV	N	SSB	1
IBV	N	UPF1	1
IBV	N	USP10	1
IBV	N	XRCC5	1
IBV	N	XRCC6	1
IBV	N	YBX1	1
IBV	N	YBX3	1
IBV	N	YTHDF2	1
IBV	N	ZCCHC3	1
IBV	NSP13	POLD1	1
IBV	NSP14	DDX1	1
IBV	S	EIF3F	1
IBV	S	FURIN	1
MERS-CoV	NSP3	ISG15	1
MERS-CoV	NSP3	RCHY1	1
MERS-CoV	ORF4A	PRKRA	1
MERS-CoV	ORF4B	IFIH1	1
MERS-CoV	ORF4B	IKBKE	1
MERS-CoV	ORF4B	KPNA3	1
MERS-CoV	ORF4B	KPNA4	1
MERS-CoV	ORF4B	TBK1	1
MERS-CoV	S	CEACAM5	1
MERS-CoV	S	HSPA5	1
MERS-CoV	S	TMPRSS13	1
MERS-CoV	S	CORIN	1
MERS-CoV	S	TMPRSS11A	1
MERS-CoV	S	TMPRSS11D	1
MHV	N	HNRNPA1	1
MHV	N	PRKRA	1
MHV	N	TUBB	1
MHV	NSP10	SDCBP	1
MHV	NSP14	DZIP1	1
MHV	NSP14	FAM184A	1
MHV	NSP14	FBF1	1
MHV	NSP14	HOMER3	1
MHV	NSP14	MON2	1
MHV	NSP14	MPRIP	1
MHV	NSP14	PDE4DIP	1
MHV	NSP14	TRIM46	1
MHV	NSP15	GANAB	1
MHV	NSP16	FBF1	1
MHV	NSP16	MPRIP	1
MHV	NSP16	PNMA2	1
MHV	NSP16	RAB3IP	1
MHV	NSP16	RILPL1	1
MHV	NSP16	USP28	1
MHV	NSP2	2310022B05RIK	1
MHV	NSP2	AACS	1
MHV	NSP2	AAK1	1
MHV	NSP2	ABHD16A	1
MHV	NSP2	ABR	1
MHV	NSP2	ACBD3	1
MHV	NSP2	ACBD5	1
MHV	NSP2	ACSL5	1
MHV	NSP2	ADD3	1
MHV	NSP2	ADNP	1
MHV	NSP2	AGAP1	1
MHV	NSP2	AGAP3	1
MHV	NSP2	AGFG1	1
MHV	NSP2	AGO2	1
MHV	NSP2	AHNAK	1
MHV	NSP2	ALDH3A2	1
MHV	NSP2	ANAPC1	1
MHV	NSP2	ANKLE2	1
MHV	NSP2	ANKRD11	1
MHV	NSP2	ANKRD17	1
MHV	NSP2	AP1G1	1
MHV	NSP2	AP1M1	1
MHV	NSP2	AP3B1	1
MHV	NSP2	APBB2	1
MHV	NSP2	APOBR	1
MHV	NSP2	ARAP1	1
MHV	NSP2	ARFGAP1	1
MHV	NSP2	ARFGAP2	1
MHV	NSP2	ARFIP1	1
MHV	NSP2	ARHGAP1	1
MHV	NSP2	ARHGAP35	1
MHV	NSP2	ARHGAP5	1
MHV	NSP2	ARHGDIB	1
MHV	NSP2	ARHGEF18	1
MHV	NSP2	ARPIN	1
MHV	NSP2	AS3MT	1
MHV	NSP2	ASAP1	1
MHV	NSP2	ASCC3	1
MHV	NSP2	ASPSCR1	1
MHV	NSP2	ATAD2B	1
MHV	NSP2	ATG2B	1
MHV	NSP2	ATP2B4	1
MHV	NSP2	ATXN10	1
MHV	NSP2	ATXN2	1
MHV	NSP2	ATXN2L	1
MHV	NSP2	AVL9	1
MHV	NSP2	BAG3	1
MHV	NSP2	BCAR3	1
MHV	NSP2	BET1	1
MHV	NSP2	BIN1	1
MHV	NSP2	BIRC6	1
MHV	NSP2	BPNT1	1
MHV	NSP2	BTF3	1
MHV	NSP2	CALD1	1
MHV	NSP2	CAMK2G	1
MHV	NSP2	CANX	1
MHV	NSP2	CAP1	1
MHV	NSP2	CAPN1	1
MHV	NSP2	CASP12	1
MHV	NSP2	CAST	1
MHV	NSP2	CBX3	1
MHV	NSP2	CCDC47	1
MHV	NSP2	CCDC59	1
MHV	NSP2	CCT8	1
MHV	NSP2	CDC37	1
MHV	NSP2	CDK12	1
MHV	NSP2	CDK5RAP3	1
MHV	NSP2	CDKAL1	1
MHV	NSP2	CDV3	1
MHV	NSP2	CEP170	1
MHV	NSP2	CFAP36	1
MHV	NSP2	CHAF1A	1
MHV	NSP2	CHD7	1
MHV	NSP2	CHMP4B	1
MHV	NSP2	CHMP7	1
MHV	NSP2	CIAPIN1	1
MHV	NSP2	CIP2A	1
MHV	NSP2	CKAP5	1
MHV	NSP2	CLCC1	1
MHV	NSP2	CLINT1	1
MHV	NSP2	CNN3	1
MHV	NSP2	COBLL1	1
MHV	NSP2	CERT1	1
MHV	NSP2	COPB2	1
MHV	NSP2	COPG2	1
MHV	NSP2	CRIP2	1
MHV	NSP2	CRK	1
MHV	NSP2	CRKL	1
MHV	NSP2	CSDE1	1
MHV	NSP2	CSE1L	1
MHV	NSP2	CTBP2	1
MHV	NSP2	CTNND1	1
MHV	NSP2	CTTN	1
MHV	NSP2	CUL4B	1
MHV	NSP2	CUL5	1
MHV	NSP2	CYB5R3	1
MHV	NSP2	CYP20A1	1
MHV	NSP2	CYP4B1	1
MHV	NSP2	CYP51A1	1
MHV	NSP2	DAB2	1
MHV	NSP2	DBNL	1
MHV	NSP2	DDHD2	1
MHV	NSP2	DDRGK1	1
MHV	NSP2	DDX1	1
MHV	NSP2	DDX3Y	1
MHV	NSP2	DHRS13	1
MHV	NSP2	DHRS9	1
MHV	NSP2	DHX33	1
MHV	NSP2	DLGAP5	1
MHV	NSP2	DNAJC10	1
MHV	NSP2	DNAJC2	1
MHV	NSP2	DNM1L	1
MHV	NSP2	DOK1	1
MHV	NSP2	DPYSL2	1
MHV	NSP2	DST	1
MHV	NSP2	DVL1	1
MHV	NSP2	DVL2	1
MHV	NSP2	DVL3	1
MHV	NSP2	DYNC1LI1	1
MHV	NSP2	DYNC1LI2	1
MHV	NSP2	ECD	1
MHV	NSP2	EDC4	1
MHV	NSP2	EFHD2	1
MHV	NSP2	EFL1	1
MHV	NSP2	EHBP1	1
MHV	NSP2	EHD2	1
MHV	NSP2	EIF2A	1
MHV	NSP2	EIF2AK3	1
MHV	NSP2	EIF2B3	1
MHV	NSP2	EIF3E	1
MHV	NSP2	EIF3F	1
MHV	NSP2	EIF3I	1
MHV	NSP2	EIF4B	1
MHV	NSP2	EIF4ENIF1	1
MHV	NSP2	EIF4G1	1
MHV	NSP2	EIF4G2	1
MHV	NSP2	EIF4G3	1
MHV	NSP2	EIF5	1
MHV	NSP2	ELP4	1
MHV	NSP2	EMD	1
MHV	NSP2	ENO3	1
MHV	NSP2	EPB41	1
MHV	NSP2	EPHX1	1
MHV	NSP2	EPS8L2	1
MHV	NSP2	ERCC6L	1
MHV	NSP2	EYA3	1
MHV	NSP2	EZR	1
MHV	NSP2	FAF2	1
MHV	NSP2	FAM114A1	1
MHV	NSP2	FAM114A2	1
MHV	NSP2	NIBAN1	1
MHV	NSP2	FAM133B	1
MHV	NSP2	RETREG2	1
MHV	NSP2	RETREG1	1
MHV	NSP2	FAM13C	1
MHV	NSP2	FAM91A1	1
MHV	NSP2	FBXO22	1
MHV	NSP2	FBXO4	1
MHV	NSP2	FGG	1
MHV	NSP2	FKBP5	1
MHV	NSP2	FKBP8	1
MHV	NSP2	FLNA	1
MHV	NSP2	FNDC3B	1
MHV	NSP2	FPGS	1
MHV	NSP2	FUS	1
MHV	NSP2	FXR1	1
MHV	NSP2	G3BP1	1
MHV	NSP2	GAG	1
MHV	NSP2	GALNT2	1
MHV	NSP2	GAPVD1	1
MHV	NSP2	GBF1	1
MHV	NSP2	GCN1	1
MHV	NSP2	GEN1	1
MHV	NSP2	GIGYF2	1
MHV	NSP2	GLMN	1
MHV	NSP2	GM38495	1
MHV	NSP2	GNE	1
MHV	NSP2	GORASP2	1
MHV	NSP2	GPAT3	1
MHV	NSP2	GPX4	1
MHV	NSP2	GSN	1
MHV	NSP2	GSPT1	1
MHV	NSP2	GTF3C4	1
MHV	NSP2	GTF3C5	1
MHV	NSP2	HM13	1
MHV	NSP2	HAUS6	1
MHV	NSP2	HCLS1	1
MHV	NSP2	HDLBP	1
MHV	NSP2	HEATR5A	1
MHV	NSP2	HECTD1	1
MHV	NSP2	HELB	1
MHV	NSP2	HELZ2	1
MHV	NSP2	HID1	1
MHV	NSP2	HINT1	1
MHV	NSP2	HMOX2	1
MHV	NSP2	JPT2	1
MHV	NSP2	HNRNPD	1
MHV	NSP2	HNRNPF	1
MHV	NSP2	HSD17B4	1
MHV	NSP2	HSPH1	1
MHV	NSP2	IFRD1	1
MHV	NSP2	IGBP1	1
MHV	NSP2	IGF2BP1	1
MHV	NSP2	ILK	1
MHV	NSP2	INF2	1
MHV	NSP2	IPO5	1
MHV	NSP2	IPO7	1
MHV	NSP2	IPO9	1
MHV	NSP2	IRS1	1
MHV	NSP2	IRS2	1
MHV	NSP2	ISYNA1	1
MHV	NSP2	ITPR3	1
MHV	NSP2	ITPRIP	1
MHV	NSP2	ITPRIPL1	1
MHV	NSP2	KANK2	1
MHV	NSP2	KAT7	1
MHV	NSP2	KHDRBS1	1
MHV	NSP2	KIF11	1
MHV	NSP2	KIF13B	1
MHV	NSP2	KIF15	1
MHV	NSP2	KIF2A	1
MHV	NSP2	KNTC1	1
MHV	NSP2	KPNA3	1
MHV	NSP2	KPNB1	1
MHV	NSP2	LARP1	1
MHV	NSP2	LARP4	1
MHV	NSP2	LDAH	1
MHV	NSP2	LEMD3	1
MHV	NSP2	LIMA1	1
MHV	NSP2	LMAN1	1
MHV	NSP2	LMCD1	1
MHV	NSP2	LNPK	1
MHV	NSP2	LPIN3	1
MHV	NSP2	LPP	1
MHV	NSP2	LRCH3	1
MHV	NSP2	LRRC57	1
MHV	NSP2	LRRFIP1	1
MHV	NSP2	LUC7L	1
MHV	NSP2	LYPLA2	1
MHV	NSP2	MAK16	1
MHV	NSP2	MAP2K1	1
MHV	NSP2	MAP4K5	1
MHV	NSP2	MAPRE2	1
MHV	NSP2	MARK1	1
MHV	NSP2	MCM2	1
MHV	NSP2	MEPCE	1
MHV	NSP2	MICAL2	1
MHV	NSP2	MINK1	1
MHV	NSP2	AFDN	1
MHV	NSP2	MON1A	1
MHV	NSP2	MPP1	1
MHV	NSP2	MRE11	1
MHV	NSP2	MSTO1	1
MHV	NSP2	MVP	1
MHV	NSP2	MXRA7	1
MHV	NSP2	MYO18A	1
MHV	NSP2	MYO5A	1
MHV	NSP2	MYO9B	1
MHV	NSP2	NAA15	1
MHV	NSP2	NACA	1
MHV	NSP2	NANS	1
MHV	NSP2	NAP1L1	1
MHV	NSP2	NAP1L4	1
MHV	NSP2	NBAS	1
MHV	NSP2	NCK1	1
MHV	NSP2	NDRG1	1
MHV	NSP2	NFIX	1
MHV	NSP2	NIPBL	1
MHV	NSP2	NMT1	1
MHV	NSP2	NSFL1C	1
MHV	NSP2	NT5C2	1
MHV	NSP2	NUDC	1
MHV	NSP2	NUDCD1	1
MHV	NSP2	NUDCD2	1
MHV	NSP2	NUDCD3	1
MHV	NSP2	NUDT5	1
MHV	NSP2	NUFIP2	1
MHV	NSP2	NUMBL	1
MHV	NSP2	OLA1	1
MHV	NSP2	OSBPL11	1
MHV	NSP2	OSBPL8	1
MHV	NSP2	OSBPL9	1
MHV	NSP2	OTUD7B	1
MHV	NSP2	PAK1	1
MHV	NSP2	PAK2	1
MHV	NSP2	PALD1	1
MHV	NSP2	PARD3	1
MHV	NSP2	PARP10	1
MHV	NSP2	PASK	1
MHV	NSP2	PCYT2	1
MHV	NSP2	PDAP1	1
MHV	NSP2	PDCD6IP	1
MHV	NSP2	PDCL	1
MHV	NSP2	PDE12	1
MHV	NSP2	PDLIM5	1
MHV	NSP2	PDXDC1	1
MHV	NSP2	PDZD8	1
MHV	NSP2	PEX14	1
MHV	NSP2	PGRMC2	1
MHV	NSP2	PICALM	1
MHV	NSP2	PKMYT1	1
MHV	NSP2	PLAA	1
MHV	NSP2	PLEKHF1	1
MHV	NSP2	PLIN3	1
MHV	NSP2	PLIN4	1
MHV	NSP2	POLR2B	1
MHV	NSP2	PON3	1
MHV	NSP2	POR	1
MHV	NSP2	PPA1	1
MHV	NSP2	PPID	1
MHV	NSP2	PPME1	1
MHV	NSP2	PPP2R5D	1
MHV	NSP2	PRAF2	1
MHV	NSP2	PREB	1
MHV	NSP2	PRKAB1	1
MHV	NSP2	PRKAR2B	1
MHV	NSP2	PRMT7	1
MHV	NSP2	PRPF31	1
MHV	NSP2	PRR11	1
MHV	NSP2	PRRC2C	1
MHV	NSP2	PRUNE1	1
MHV	NSP2	PSMB3	1
MHV	NSP2	PSMC2	1
MHV	NSP2	PSMD1	1
MHV	NSP2	PSMD4	1
MHV	NSP2	PSMG1	1
MHV	NSP2	PTK2	1
MHV	NSP2	PTPN1	1
MHV	NSP2	PTPN12	1
MHV	NSP2	PTPN2	1
MHV	NSP2	PTPN23	1
MHV	NSP2	CAVIN1	1
MHV	NSP2	PUF60	1
MHV	NSP2	PXN	1
MHV	NSP2	RAB11FIP5	1
MHV	NSP2	RAB32	1
MHV	NSP2	RAB3GAP1	1
MHV	NSP2	RAB3GAP2	1
MHV	NSP2	RAB5C	1
MHV	NSP2	RABGAP1	1
MHV	NSP2	RAI14	1
MHV	NSP2	RANBP2	1
MHV	NSP2	RANGAP1	1
MHV	NSP2	RAPGEF2	1
MHV	NSP2	RAPH1	1
MHV	NSP2	RASA1	1
MHV	NSP2	RASA3	1
MHV	NSP2	RBM14	1
MHV	NSP2	RCC1	1
MHV	NSP2	RIC8A	1
MHV	NSP2	RINT1	1
MHV	NSP2	RIOK2	1
MHV	NSP2	RMDN2	1
MHV	NSP2	RNF213	1
MHV	NSP2	OBI1	1
MHV	NSP2	RPAP3	1
MHV	NSP2	RPL13A	1
MHV	NSP2	RPS6KA4	1
MHV	NSP2	RRBP1	1
MHV	NSP2	RRM2	1
MHV	NSP2	RSL24D1	1
MHV	NSP2	RTN4	1
MHV	NSP2	S100A11	1
MHV	NSP2	SACM1L	1
MHV	NSP2	SBF1	1
MHV	NSP2	SCFD1	1
MHV	NSP2	SEC13	1
MHV	NSP2	SEC22B	1
MHV	NSP2	SEC23IP	1
MHV	NSP2	SEC24B	1
MHV	NSP2	SEC24D	1
MHV	NSP2	SEC63	1
MHV	NSP2	SECISBP2	1
MHV	NSP2	SERBP1	1
MHV	NSP2	SETD3	1
MHV	NSP2	SF1	1
MHV	NSP2	SH3BP2	1
MHV	NSP2	SH3BP4	1
MHV	NSP2	SH3GL1	1
MHV	NSP2	SH3KBP1	1
MHV	NSP2	SH3PXD2B	1
MHV	NSP2	SHQ1	1
MHV	NSP2	SLC1A5	1
MHV	NSP2	SLFN9	1
MHV	NSP2	SLK	1
MHV	NSP2	SLMAP	1
MHV	NSP2	SMAD3	1
MHV	NSP2	SMAP1	1
MHV	NSP2	SMOX	1
MHV	NSP2	SNAP29	1
MHV	NSP2	SNAP47	1
MHV	NSP2	SNCG	1
MHV	NSP2	SNRPE	1
MHV	NSP2	SNX1	1
MHV	NSP2	SNX2	1
MHV	NSP2	SNX5	1
MHV	NSP2	SNX6	1
MHV	NSP2	SNX9	1
MHV	NSP2	SPATS2	1
MHV	NSP2	SPART	1
MHV	NSP2	SPTLC2	1
MHV	NSP2	SQSTM1	1
MHV	NSP2	SRP54	1
MHV	NSP2	SRP68	1
MHV	NSP2	SSB	1
MHV	NSP2	STAM2	1
MHV	NSP2	STAT1	1
MHV	NSP2	STAT5A	1
MHV	NSP2	STBD1	1
MHV	NSP2	STIM2	1
MHV	NSP2	STIP1	1
MHV	NSP2	STK10	1
MHV	NSP2	STK38	1
MHV	NSP2	STRIP1	1
MHV	NSP2	STRN3	1
MHV	NSP2	STRN4	1
MHV	NSP2	STT3B	1
MHV	NSP2	STX18	1
MHV	NSP2	STX5	1
MHV	NSP2	STXBP1	1
MHV	NSP2	STXBP3	1
MHV	NSP2	SUGT1	1
MHV	NSP2	SURF4	1
MHV	NSP2	SVIL	1
MHV	NSP2	SWAP70	1
MHV	NSP2	SYAP1	1
MHV	NSP2	SYNCRIP	1
MHV	NSP2	TANC1	1
MHV	NSP2	TAP1	1
MHV	NSP2	TAP2	1
MHV	NSP2	TARS1	1
MHV	NSP2	TBC1D15	1
MHV	NSP2	TBC1D8	1
MHV	NSP2	TBC1D8B	1
MHV	NSP2	TBCB	1
MHV	NSP2	TDRD3	1
MHV	NSP2	TEX2	1
MHV	NSP2	TFEB	1
MHV	NSP2	THADA	1
MHV	NSP2	THUMPD3	1
MHV	NSP2	TIMM50	1
MHV	NSP2	TIPRL	1
MHV	NSP2	TJAP1	1
MHV	NSP2	TJP1	1
MHV	NSP2	TLN1	1
MHV	NSP2	TMEM199	1
MHV	NSP2	TMEM209	1
MHV	NSP2	TMOD3	1
MHV	NSP2	TMPO	1
MHV	NSP2	TNPO1	1
MHV	NSP2	TNPO3	1
MHV	NSP2	TNRC6B	1
MHV	NSP2	TNS1	1
MHV	NSP2	TRIP4	1
MHV	NSP2	TRIP6	1
MHV	NSP2	RO60	1
MHV	NSP2	TRPV2	1
MHV	NSP2	TTC37	1
MHV	NSP2	TTK	1
MHV	NSP2	TWF2	1
MHV	NSP2	TXNL1	1
MHV	NSP2	UBA2	1
MHV	NSP2	UBAP2	1
MHV	NSP2	UBAP2L	1
MHV	NSP2	UBE2J1	1
MHV	NSP2	UBE3A	1
MHV	NSP2	UBE4A	1
MHV	NSP2	UBR1	1
MHV	NSP2	UBXN4	1
MHV	NSP2	UBXN8	1
MHV	NSP2	UGP2	1
MHV	NSP2	UHRF1	1
MHV	NSP2	URB1	1
MHV	NSP2	USE1	1
MHV	NSP2	USP10	1
MHV	NSP2	USP15	1
MHV	NSP2	USP4	1
MHV	NSP2	USP47	1
MHV	NSP2	UTP20	1
MHV	NSP2	UTP3	1
MHV	NSP2	VANGL1	1
MHV	NSP2	VAPA	1
MHV	NSP2	VAPB	1
MHV	NSP2	VCPIP1	1
MHV	NSP2	VPS36	1
MHV	NSP2	VRK2	1
MHV	NSP2	WASHC2	1
MHV	NSP2	WDR44	1
MHV	NSP2	WIPI1	1
MHV	NSP2	WIPI2	1
MHV	NSP2	WWC2	1
MHV	NSP2	WWOX	1
MHV	NSP2	XDH	1
MHV	NSP2	YAP1	1
MHV	NSP2	YKT6	1
MHV	NSP2	YTHDF1	1
MHV	NSP2	YTHDF2	1
MHV	NSP2	YTHDF3	1
MHV	NSP2	ZADH2	1
MHV	NSP2	ZC2HC1A	1
MHV	NSP2	ZC3H15	1
MHV	NSP2	ZFYVE1	1
MHV	NSP2	ZYX	1
MHV	NSP3	AGAP3	1
MHV	NSP3	IRF3	1
MHV	NSP3	ISG15	1
MHV	NSP3	KIFC3	1
MHV	NSP3	MT-CO1	1
MHV	NSP3	TBK1	1
MHV	NSP3	TXN	1
MHV	NSP3	UBC	1
MHV	NSP5	APBA3	1
MHV	NSP5	CGRRF1	1
MHV	NSP5	DDIT4L	1
MHV	NSP5	DZANK1	1
MHV	NSP5	KLHL8	1
MHV	NSP5	MAGI3	1
MHV	NSP5	MTMR3	1
MHV	NSP7	HEATR6	1
MHV	NSP7	PIAS1	1
MHV	NSP7	SGTA	1
MHV	NSP8	PRKAR1B	1
MHV	NSP9	ADK	1
MHV	NSP9	HTRA2	1
MHV	NSP9	RUFY1	1
MHV	S	CTSB	1
MHV	S	CTSL	1
PDCov	N	IFIH1	1
PDCov	N	TRAF3	1
PDCoV	ORF6	DDX58	1
PDCoV	ORF6	IFIH1	1
PEDV	N	HNRNPA1	1
PEDV	N	IKBKE	1
PEDV	N	TBK1	1
PEDV	NSP5	IKBKG	1
PEDV	ORF3	ADAMTSL3	1
PEDV	ORF3	ATPAF2	1
PEDV	ORF3	CALM1	1
PEDV	ORF3	CEP44	1
PEDV	ORF3	FIP1L1	1
PEDV	ORF3	FZD6	1
PEDV	ORF3	GSTP1	1
PEDV	ORF3	IKBKB	1
PEDV	ORF3	MARCHF10	1
PEDV	ORF3	MAT2A	1
PEDV	ORF3	MCOLN2	1
PEDV	ORF3	IRAG1	1
PEDV	ORF3	NDUFA13	1
PEDV	ORF3	PLAU	1
PEDV	ORF3	RIPPLY3	1
PEDV	ORF3	SFSWAP	1
PEDV	ORF3	SNX13	1
PEDV	ORF3	STAT4	1
PEDV	ORF3	TANC1	1
PEDV	ORF3	VPS36	1
PEDV	ORF3	XPNPEP3	1
PEDV	ORF3	ZNF443	1
PEDV	S	CTSB	1
PEDV	S	CTSL	1
PRCV	S	ANPEP	1
SARS-CoV	E	BCL2L1	1
SARS-CoV	E	MPP5	1
SARS-CoV	E	SDCBP	1
SARS-CoV	M	IKBKB	1
SARS-CoV	M	SSR3	1
SARS-CoV	N	EEF1A1	1
SARS-CoV	N	GSK3A	1
SARS-CoV	N	GSK3B	1
SARS-CoV	N	HNRNPA1	1
SARS-CoV	N	PRKRA	1
SARS-CoV	N	UBE2I	1
SARS-CoV	NSP1	CKAP5	1
SARS-CoV	NSP1	CPNE3	1
SARS-CoV	NSP1	DIDO1	1
SARS-CoV	NSP1	FKBP1A	1
SARS-CoV	NSP1	LAS1L	1
SARS-CoV	NSP1	PPIA	1
SARS-CoV	NSP1	PPIG	1
SARS-CoV	NSP1	PPIH	1
SARS-CoV	NSP1	RCAN3	1
SARS-CoV	NSP1	RFC2	1
SARS-CoV	NSP1	RPP38	1
SARS-CoV	NSP1	SNRNP48	1
SARS-CoV	NSP1	USP7	1
SARS-CoV	NSP10	ATF5	1
SARS-CoV	NSP10	BTF3	1
SARS-CoV	NSP10	IFTAP	1
SARS-CoV	NSP10	MT-CO2	1
SARS-CoV	NSP10	MT-ND4L	1
SARS-CoV	NSP12	CCHCR1	1
SARS-CoV	NSP12	CHMP2B	1
SARS-CoV	NSP12	HOXC6	1
SARS-CoV	NSP12	MNAT1	1
SARS-CoV	NSP12	NDUFA10	1
SARS-CoV	NSP12	PFDN5	1
SARS-CoV	NSP12	POLR2B	1
SARS-CoV	NSP12	SNAP47	1
SARS-CoV	NSP12	TBCB	1
SARS-CoV	NSP12	TPSAB1	1
SARS-CoV	NSP12	TPSB2	1
SARS-CoV	NSP13	ACTN2	1
SARS-CoV	NSP13	ADA	1
SARS-CoV	NSP13	BCAS2	1
SARS-CoV	NSP13	CHEK2	1
SARS-CoV	NSP13	DARS2	1
SARS-CoV	NSP13	DDX5	1
SARS-CoV	NSP13	MARK2	1
SARS-CoV	NSP13	MARK3	1
SARS-CoV	NSP13	N4BP2L2	1
SARS-CoV	NSP13	OCIAD2	1
SARS-CoV	NSP13	POLD1	1
SARS-CoV	NSP13	RYBP	1
SARS-CoV	NSP13	SERPING1	1
SARS-CoV	NSP13	SMARCB1	1
SARS-CoV	NSP13	THAP11	1
SARS-CoV	NSP14	DCTN2	1
SARS-CoV	NSP14	DDX1	1
SARS-CoV	NSP14	SERPING1	1
SARS-CoV	NSP15	PPIA	1
SARS-CoV	NSP15	RB1	1
SARS-CoV	NSP2	DEDD2	1
SARS-CoV	NSP2	EIF3M	1
SARS-CoV	NSP2	EIF4E2	1
SARS-CoV	NSP2	GIGYF2	1
SARS-CoV	NSP2	KMT2D	1
SARS-CoV	NSP2	NPHP3	1
SARS-CoV	NSP2	PCM1	1
SARS-CoV	NSP2	PHB	1
SARS-CoV	NSP2	PHB2	1
SARS-CoV	NSP2	SERPING1	1
SARS-CoV	NSP2	SLC1A5	1
SARS-CoV	NSP2	SLC46A3	1
SARS-CoV	NSP2	SPEN	1
SARS-CoV	NSP2	STOML2	1
SARS-CoV	NSP2	VDAC1	1
SARS-CoV	NSP3	ABHD17A	1
SARS-CoV	NSP3	CAMK2D	1
SARS-CoV	NSP3	IKBKE	1
SARS-CoV	NSP3	MKRN2	1
SARS-CoV	NSP3	MKRN3	1
SARS-CoV	NSP3	RCHY1	1
SARS-CoV	NSP3	TBK1	1
SARS-CoV	NSP3	TRAF3	1
SARS-CoV	NSP3	UBB	1
SARS-CoV	NSP3	ZNF410	1
SARS-CoV	NSP4	LAS1L	1
SARS-CoV	NSP4	NMB	1
SARS-CoV	NSP5	ATP6V1G1	1
SARS-CoV	NSP5	C20ORF27	1
SARS-CoV	NSP5	FKBP1A	1
SARS-CoV	NSP5	N4BP2L2	1
SARS-CoV	NSP5	XPA	1
SARS-CoV	NSP6	CCNL1	1
SARS-CoV	NSP6	ISLR	1
SARS-CoV	NSP6	NPIPB3	1
SARS-CoV	NSP6	RBMXL2	1
SARS-CoV	NSP7	ARL4D	1
SARS-CoV	NSP7	BAP1	1
SARS-CoV	NSP7	DDAH2	1
SARS-CoV	NSP7	LCP1	1
SARS-CoV	NSP7	MIF4GD	1
SARS-CoV	NSP7	NAE1	1
SARS-CoV	NSP7	NCOA5	1
SARS-CoV	NSP7	PLEKHO1	1
SARS-CoV	NSP7	RNF128	1
SARS-CoV	NSP7	YWHAE	1
SARS-CoV	NSP8	BZW2	1
SARS-CoV	NSP8	EIF4B	1
SARS-CoV	NSP8	MACROH2A2	1
SARS-CoV	NSP8	NOMO3	1
SARS-CoV	NSP8	SERPING1	1
SARS-CoV	NSP8	TERF1	1
SARS-CoV	NSP9	CHMP2B	1
SARS-CoV	NSP9	ENO1	1
SARS-CoV	NSP9	FAHD1	1
SARS-CoV	NSP9	NPHP3	1
SARS-CoV	NSP9	RSRP1	1
SARS-CoV	NSP9	SNAP47	1
SARS-CoV	ORF13	RYBP	1
SARS-CoV	ORF14	DCTN2	1
SARS-CoV	ORF14	HGS	1
SARS-CoV	ORF14	SERPING1	1
SARS-CoV	ORF14	YAE1	1
SARS-CoV	ORF3A	CAV1	1
SARS-CoV	ORF3A	DCTN2	1
SARS-CoV	ORF3A	PFDN5	1
SARS-CoV	ORF3A	PYCARD	1
SARS-CoV	ORF3A	TRAF2	1
SARS-CoV	ORF3A	TRAF3	1
SARS-CoV	ORF3A	TRAF6	1
SARS-CoV	ORF3A	YWHAE	1
SARS-CoV	ORF3B	ALB	1
SARS-CoV	ORF3B	DCTN2	1
SARS-CoV	ORF3B	SERPING1	1
SARS-CoV	ORF6	BRF1	1
SARS-CoV	ORF6	DCTN2	1
SARS-CoV	ORF6	KPNA2	1
SARS-CoV	ORF6	KPNB1	1
SARS-CoV	ORF7A	BCL2	1
SARS-CoV	ORF7A	BCL2A1	1
SARS-CoV	ORF7A	BCL2L1	1
SARS-CoV	ORF7A	BCL2L2	1
SARS-CoV	ORF7A	MCL1	1
SARS-CoV	ORF7A	SGTA	1
SARS-CoV	ORF7A	SMOC1	1
SARS-CoV	ORF7A	VKORC1	1
SARS-CoV	ORF7B	CAMLG	1
SARS-CoV	ORF7B	SERPING1	1
SARS-CoV	ORF8A	BAG6	1
SARS-CoV	ORF8AB	ATF6	1
SARS-CoV	ORF8AB	IRF3	1
SARS-CoV	ORF8B	IRF3	1
SARS-CoV	ORF9B	XPO1	1
SARS-CoV	ORF9B	DNM1L	1
SARS-CoV	ORF9B	MARK3	1
SARS-CoV	ORF9B	MAVS	1
SARS-CoV	ORF9B	PCBP2	1
SARS-CoV	ORF9B	PSMA2	1
SARS-CoV	ORF9B	RPS17	1
SARS-CoV	ORF9B	RPS20	1
SARS-CoV	S	CD209	1
SARS-CoV	S	CLEC4M	1
SARS-CoV	S	CTSL	1
SARS-CoV	S	TMPRSS11E	1
SARS-CoV	S	EIF3F	1
SARS-CoV	S	EZR	1
SARS-CoV	S	SFTPD	1
SARS-CoV	S	TMPRSS11D	1
SARS-CoV-2	E	AP3B1	1
SARS-CoV-2	E	BRD2	1
SARS-CoV-2	E	BRD4	1
SARS-CoV-2	E	CWC27	1
SARS-CoV-2	E	SLC44A2	1
SARS-CoV-2	E	ZC3H18	1
SARS-CoV-2	M	AAR2	1
SARS-CoV-2	M	AASS	1
SARS-CoV-2	M	ACADM	1
SARS-CoV-2	M	AKAP8L	1
SARS-CoV-2	M	ANO6	1
SARS-CoV-2	M	ATP1B1	1
SARS-CoV-2	M	ATP6V1A	1
SARS-CoV-2	M	BZW2	1
SARS-CoV-2	M	COQ8B	1
SARS-CoV-2	M	ETFA	1
SARS-CoV-2	M	FAM8A1	1
SARS-CoV-2	M	FASTKD5	1
SARS-CoV-2	M	GGCX	1
SARS-CoV-2	M	INTS4	1
SARS-CoV-2	M	PITRM1	1
SARS-CoV-2	M	PMPCA	1
SARS-CoV-2	M	PMPCB	1
SARS-CoV-2	M	PSMD8	1
SARS-CoV-2	M	REEP5	1
SARS-CoV-2	M	REEP6	1
SARS-CoV-2	M	RTN4	1
SARS-CoV-2	M	SAAL1	1
SARS-CoV-2	M	SLC25A21	1
SARS-CoV-2	M	SLC30A7	1
SARS-CoV-2	M	SLC30A9	1
SARS-CoV-2	M	STOM	1
SARS-CoV-2	M	TARS2	1
SARS-CoV-2	M	TUBGCP2	1
SARS-CoV-2	M	TUBGCP3	1
SARS-CoV-2	M	YIF1A	1
SARS-CoV-2	N	CSNK2A2	1
SARS-CoV-2	N	CSNK2B	1
SARS-CoV-2	N	DDX21	1
SARS-CoV-2	N	FAM98A	1
SARS-CoV-2	N	G3BP1	1
SARS-CoV-2	N	G3BP2	1
SARS-CoV-2	N	LARP1	1
SARS-CoV-2	N	MOV10	1
SARS-CoV-2	N	PABPC1	1
SARS-CoV-2	N	PABPC4	1
SARS-CoV-2	N	RBM28	1
SARS-CoV-2	N	RPL36	1
SARS-CoV-2	N	RRP9	1
SARS-CoV-2	N	SNIP1	1
SARS-CoV-2	N	UPF1	1
SARS-CoV-2	NSP1	COLGALT1	1
SARS-CoV-2	NSP1	PKP2	1
SARS-CoV-2	NSP1	POLA1	1
SARS-CoV-2	NSP1	POLA2	1
SARS-CoV-2	NSP1	PRIM1	1
SARS-CoV-2	NSP1	PRIM2	1
SARS-CoV-2	NSP10	AP2A2	1
SARS-CoV-2	NSP10	AP2M1	1
SARS-CoV-2	NSP10	ERGIC1	1
SARS-CoV-2	NSP10	GFER	1
SARS-CoV-2	NSP10	GRPEL1	1
SARS-CoV-2	NSP11	TBCA	1
SARS-CoV-2	NSP12	AKAP8	1
SARS-CoV-2	NSP12	BCKDK	1
SARS-CoV-2	NSP12	CRTC3	1
SARS-CoV-2	NSP12	LARP4B	1
SARS-CoV-2	NSP12	MYCBP2	1
SARS-CoV-2	NSP12	PDZD11	1
SARS-CoV-2	NSP12	PLEKHA5	1
SARS-CoV-2	NSP12	PPIL3	1
SARS-CoV-2	NSP12	PRRC2B	1
SARS-CoV-2	NSP12	RBM41	1
SARS-CoV-2	NSP12	RIPK1	1
SARS-CoV-2	NSP12	SBNO1	1
SARS-CoV-2	NSP12	SLU7	1
SARS-CoV-2	NSP12	TCF12	1
SARS-CoV-2	NSP12	TYSND1	1
SARS-CoV-2	NSP12	UBAP2	1
SARS-CoV-2	NSP12	UBAP2L	1
SARS-CoV-2	NSP12	USP54	1
SARS-CoV-2	NSP12	ZC3H7A	1
SARS-CoV-2	NSP12	ZNF318	1
SARS-CoV-2	NSP13	AKAP9	1
SARS-CoV-2	NSP13	C1ORF50	1
SARS-CoV-2	NSP13	CDK5RAP2	1
SARS-CoV-2	NSP13	CENPF	1
SARS-CoV-2	NSP13	CEP112	1
SARS-CoV-2	NSP13	CEP135	1
SARS-CoV-2	NSP13	CEP250	1
SARS-CoV-2	NSP13	CEP350	1
SARS-CoV-2	NSP13	CEP68	1
SARS-CoV-2	NSP13	CIT	1
SARS-CoV-2	NSP13	CLIP4	1
SARS-CoV-2	NSP13	CNTRL	1
SARS-CoV-2	NSP13	ERC1	1
SARS-CoV-2	NSP13	CEP43	1
SARS-CoV-2	NSP13	FYCO1	1
SARS-CoV-2	NSP13	GCC1	1
SARS-CoV-2	NSP13	GCC2	1
SARS-CoV-2	NSP13	GOLGA2	1
SARS-CoV-2	NSP13	GOLGA3	1
SARS-CoV-2	NSP13	GOLGB1	1
SARS-CoV-2	NSP13	GORASP1	1
SARS-CoV-2	NSP13	GRIPAP1	1
SARS-CoV-2	NSP13	HOOK1	1
SARS-CoV-2	NSP13	HSBP1	1
SARS-CoV-2	NSP13	JAKMIP1	1
SARS-CoV-2	NSP13	MIPOL1	1
SARS-CoV-2	NSP13	NIN	1
SARS-CoV-2	NSP13	NINL	1
SARS-CoV-2	NSP13	PCNT	1
SARS-CoV-2	NSP13	PDE4DIP	1
SARS-CoV-2	NSP13	PRKACA	1
SARS-CoV-2	NSP13	PRKAR2A	1
SARS-CoV-2	NSP13	PRKAR2B	1
SARS-CoV-2	NSP13	RDX	1
SARS-CoV-2	NSP13	TBK1	1
SARS-CoV-2	NSP13	TBKBP1	1
SARS-CoV-2	NSP13	TLE1	1
SARS-CoV-2	NSP13	TLE3	1
SARS-CoV-2	NSP13	TLE5	1
SARS-CoV-2	NSP13	USP13	1
SARS-CoV-2	NSP14	GLA	1
SARS-CoV-2	NSP14	IMPDH2	1
SARS-CoV-2	NSP14	SIRT5	1
SARS-CoV-2	NSP15	ARF6	1
SARS-CoV-2	NSP15	NUTF2	1
SARS-CoV-2	NSP15	RNF41	1
SARS-CoV-2	NSP2	EIF4E2	1
SARS-CoV-2	NSP2	FKBP15	1
SARS-CoV-2	NSP2	GIGYF2	1
SARS-CoV-2	NSP2	POR	1
SARS-CoV-2	NSP2	RAP1GDS1	1
SARS-CoV-2	NSP2	SLC27A2	1
SARS-CoV-2	NSP2	WASHC4	1
SARS-CoV-2	NSP4	ALG11	1
SARS-CoV-2	NSP4	DNAJC11	1
SARS-CoV-2	NSP4	IDE	1
SARS-CoV-2	NSP4	NUP210	1
SARS-CoV-2	NSP4	TIMM10	1
SARS-CoV-2	NSP4	TIMM10B	1
SARS-CoV-2	NSP4	TIMM29	1
SARS-CoV-2	NSP4	TIMM9	1
SARS-CoV-2	NSP5	GPX1	1
SARS-CoV-2	NSP5	HDAC2	1
SARS-CoV-2	NSP5	TRMT1	1
SARS-CoV-2	NSP6	ATP13A3	1
SARS-CoV-2	NSP6	ATP5MG	1
SARS-CoV-2	NSP6	ATP6AP1	1
SARS-CoV-2	NSP6	SIGMAR1	1
SARS-CoV-2	NSP7	ACSL3	1
SARS-CoV-2	NSP7	AGPS	1
SARS-CoV-2	NSP7	COMT	1
SARS-CoV-2	NSP7	CYB5B	1
SARS-CoV-2	NSP7	CYB5R3	1
SARS-CoV-2	NSP7	DCAKD	1
SARS-CoV-2	NSP7	DNAJC19	1
SARS-CoV-2	NSP7	FAM162A	1
SARS-CoV-2	NSP7	GNB1	1
SARS-CoV-2	NSP7	GNG5	1
SARS-CoV-2	NSP7	HS2ST1	1
SARS-CoV-2	NSP7	LMAN2	1
SARS-CoV-2	NSP7	MOGS	1
SARS-CoV-2	NSP7	MTARC1	1
SARS-CoV-2	NSP7	NAT14	1
SARS-CoV-2	NSP7	NDUFAF2	1
SARS-CoV-2	NSP7	PTGES2	1
SARS-CoV-2	NSP7	QSOX2	1
SARS-CoV-2	NSP7	RAB10	1
SARS-CoV-2	NSP7	RAB14	1
SARS-CoV-2	NSP7	RAB18	1
SARS-CoV-2	NSP7	RAB1A	1
SARS-CoV-2	NSP7	RAB2A	1
SARS-CoV-2	NSP7	RAB5C	1
SARS-CoV-2	NSP7	RAB7A	1
SARS-CoV-2	NSP7	RAB8A	1
SARS-CoV-2	NSP7	RALA	1
SARS-CoV-2	NSP7	RHOA	1
SARS-CoV-2	NSP7	SCARB1	1
SARS-CoV-2	NSP7	SCCPDH	1
SARS-CoV-2	NSP7	SELENOS	1
SARS-CoV-2	NSP7	TOR1AIP1	1
SARS-CoV-2	NSP8	AATF	1
SARS-CoV-2	NSP8	ATE1	1
SARS-CoV-2	NSP8	CCDC86	1
SARS-CoV-2	NSP8	DDX10	1
SARS-CoV-2	NSP8	EXOSC2	1
SARS-CoV-2	NSP8	EXOSC3	1
SARS-CoV-2	NSP8	EXOSC5	1
SARS-CoV-2	NSP8	EXOSC8	1
SARS-CoV-2	NSP8	HECTD1	1
SARS-CoV-2	NSP8	LARP7	1
SARS-CoV-2	NSP8	MEPCE	1
SARS-CoV-2	NSP8	MPHOSPH10	1
SARS-CoV-2	NSP8	MRPS2	1
SARS-CoV-2	NSP8	MRPS25	1
SARS-CoV-2	NSP8	MRPS27	1
SARS-CoV-2	NSP8	MRPS5	1
SARS-CoV-2	NSP8	NARS2	1
SARS-CoV-2	NSP8	NGDN	1
SARS-CoV-2	NSP8	NOL10	1
SARS-CoV-2	NSP8	NSD2	1
SARS-CoV-2	NSP8	SEPSECS	1
SARS-CoV-2	NSP8	SRP19	1
SARS-CoV-2	NSP8	SRP54	1
SARS-CoV-2	NSP8	SRP72	1
SARS-CoV-2	NSP9	DCAF7	1
SARS-CoV-2	NSP9	EIF4H	1
SARS-CoV-2	NSP9	FBLN5	1
SARS-CoV-2	NSP9	FBN1	1
SARS-CoV-2	NSP9	FBN2	1
SARS-CoV-2	NSP9	GTF2F2	1
SARS-CoV-2	NSP9	MAT2B	1
SARS-CoV-2	NSP9	MIB1	1
SARS-CoV-2	NSP9	NEK9	1
SARS-CoV-2	NSP9	NUP214	1
SARS-CoV-2	NSP9	NUP54	1
SARS-CoV-2	NSP9	NUP58	1
SARS-CoV-2	NSP9	NUP62	1
SARS-CoV-2	NSP9	NUP88	1
SARS-CoV-2	NSP9	SPART	1
SARS-CoV-2	NSP9	ZNF503	1
SARS-CoV-2	ORF10	CUL2	1
SARS-CoV-2	ORF10	ELOB	1
SARS-CoV-2	ORF10	ELOC	1
SARS-CoV-2	ORF10	MAP7D1	1
SARS-CoV-2	ORF10	PPT1	1
SARS-CoV-2	ORF10	RBX1	1
SARS-CoV-2	ORF10	THTPA	1
SARS-CoV-2	ORF10	TIMM8B	1
SARS-CoV-2	ORF10	ZYG11B	1
SARS-CoV-2	ORF3A	ALG5	1
SARS-CoV-2	ORF3A	ARL6IP6	1
SARS-CoV-2	ORF3A	CLCC1	1
SARS-CoV-2	ORF3A	HMOX1	1
SARS-CoV-2	ORF3A	SUN2	1
SARS-CoV-2	ORF3A	TRIM59	1
SARS-CoV-2	ORF3A	VPS11	1
SARS-CoV-2	ORF3A	VPS39	1
SARS-CoV-2	ORF3B	STOML2	1
SARS-CoV-2	ORF6	MTCH1	1
SARS-CoV-2	ORF6	NUP98	1
SARS-CoV-2	ORF6	RAE1	1
SARS-CoV-2	ORF7A	HEATR3	1
SARS-CoV-2	ORF7A	MDN1	1
SARS-CoV-2	ORF8	ADAM9	1
SARS-CoV-2	ORF8	ADAMTS1	1
SARS-CoV-2	ORF8	CHPF	1
SARS-CoV-2	ORF8	CHPF2	1
SARS-CoV-2	ORF8	CISD3	1
SARS-CoV-2	ORF8	COL6A1	1
SARS-CoV-2	ORF8	DNMT1	1
SARS-CoV-2	ORF8	EDEM3	1
SARS-CoV-2	ORF8	EMC1	1
SARS-CoV-2	ORF8	ERLEC1	1
SARS-CoV-2	ORF8	ERO1B	1
SARS-CoV-2	ORF8	ERP44	1
SARS-CoV-2	ORF8	FBXL12	1
SARS-CoV-2	ORF8	FKBP10	1
SARS-CoV-2	ORF8	FKBP7	1
SARS-CoV-2	ORF8	FOXRED2	1
SARS-CoV-2	ORF8	GDF15	1
SARS-CoV-2	ORF8	GGH	1
SARS-CoV-2	ORF8	HS6ST2	1
SARS-CoV-2	ORF8	HYOU1	1
SARS-CoV-2	ORF8	IL17RA	1
SARS-CoV-2	ORF8	INHBE	1
SARS-CoV-2	ORF8	ITGB1	1
SARS-CoV-2	ORF8	LOX	1
SARS-CoV-2	ORF8	MFGE8	1
SARS-CoV-2	ORF8	NEU1	1
SARS-CoV-2	ORF8	NGLY1	1
SARS-CoV-2	ORF8	NPC2	1
SARS-CoV-2	ORF8	NPTX1	1
SARS-CoV-2	ORF8	OS9	1
SARS-CoV-2	ORF8	PCSK6	1
SARS-CoV-2	ORF8	PLAT	1
SARS-CoV-2	ORF8	PLD3	1
SARS-CoV-2	ORF8	PLEKHF2	1
SARS-CoV-2	ORF8	PLOD2	1
SARS-CoV-2	ORF8	POFUT1	1
SARS-CoV-2	ORF8	POGLUT2	1
SARS-CoV-2	ORF8	POGLUT3	1
SARS-CoV-2	ORF8	PUSL1	1
SARS-CoV-2	ORF8	PVR	1
SARS-CoV-2	ORF8	SDF2	1
SARS-CoV-2	ORF8	SIL1	1
SARS-CoV-2	ORF8	SMOC1	1
SARS-CoV-2	ORF8	STC2	1
SARS-CoV-2	ORF8	TM2D3	1
SARS-CoV-2	ORF8	TOR1A	1
SARS-CoV-2	ORF8	UGGT2	1
SARS-CoV-2	ORF9B	BAG5	1
SARS-CoV-2	ORF9B	CHMP2A	1
SARS-CoV-2	ORF9B	CSDE1	1
SARS-CoV-2	ORF9B	DCTPP1	1
SARS-CoV-2	ORF9B	DPH5	1
SARS-CoV-2	ORF9B	MARK1	1
SARS-CoV-2	ORF9B	MARK2	1
SARS-CoV-2	ORF9B	MARK3	1
SARS-CoV-2	ORF9B	PTBP2	1
SARS-CoV-2	ORF9B	SLC9A3R1	1
SARS-CoV-2	ORF9B	TOMM70	1
SARS-CoV-2	ORF9C	ABCC1	1
SARS-CoV-2	ORF9C	ACAD9	1
SARS-CoV-2	ORF9C	ALG8	1
SARS-CoV-2	ORF9C	BCS1L	1
SARS-CoV-2	ORF9C	DPY19L1	1
SARS-CoV-2	ORF9C	ECSIT	1
SARS-CoV-2	ORF9C	ERMP1	1
SARS-CoV-2	ORF9C	F2RL1	1
SARS-CoV-2	ORF9C	FAR2	1
SARS-CoV-2	ORF9C	GHITM	1
SARS-CoV-2	ORF9C	GPAA1	1
SARS-CoV-2	ORF9C	NDFIP2	1
SARS-CoV-2	ORF9C	NDUFAF1	1
SARS-CoV-2	ORF9C	NDUFB9	1
SARS-CoV-2	ORF9C	NLRX1	1
SARS-CoV-2	ORF9C	PIGO	1
SARS-CoV-2	ORF9C	PIGS	1
SARS-CoV-2	ORF9C	RETREG3	1
SARS-CoV-2	ORF9C	SCAP	1
SARS-CoV-2	ORF9C	SLC30A6	1
SARS-CoV-2	ORF9C	TAPT1	1
SARS-CoV-2	ORF9C	TMED5	1
SARS-CoV-2	ORF9C	TMEM39B	1
SARS-CoV-2	ORF9C	TMEM97	1
SARS-CoV-2	ORF9C	UBXN8	1
SARS-CoV-2	ORF9C	WFS1	1
SARS-CoV-2	S	GOLGA7	1
SARS-CoV-2	S	ZDHHC5	1
TGEV	M	EIF4A2	1
TGEV	N	ACTN4	1
TGEV	N	DDX1	1
TGEV	N	DHX9	1
TGEV	N	HNRNPU	1
TGEV	N	MYH10	1
TGEV	N	MYH9	1
TGEV	N	RPL26	1
TGEV	N	RPS13	1
TGEV	N	RPS9	1
TGEV	N	TFRC	1
TGEV	N	VASH1	1
TGEV	N	VIM	1
TGEV	NSP14	DDX1	1
TGEV	ORF7	EIF2A	1
TGEV	ORF7	PPP1CA	1
TGEV	S	EGFR	1
TGEV	S	FLNA	1
TGEV	S	TFRC	1
TGEV	S	TUBA4A	1
TGEV	S	TUBB2A	1
TGEV	S	TUBB4A	1
TGEV	S	TUBB6	1
TGEV	S	UBXN1	1

## Sheet: Table S3
VIRUSES	INTERACTIONS		This table indicates, for each virus, the number of interactions identified
MHV	550
SARS-CoV-2	333
SARS-CoV	178
IBV	146
PEDV	29
TGEV	26
MERS-CoV	17
HCoV-OC43	11
HCoV-229E	7
HCoV-NL63	7
PDCov	5
HCoV-HKU1	1
PRCV	1

## Sheet: Table S4
VIRAL PROTEIN	CELLULAR PROTEIN (Uniprot)	Number of viruses	VIRUSES		List of interactions reported multiple times accross different viruses (i.e. orthologous interactions)
N	HNRNPA1	5	HCoV-OC43 IBV MHV PEDV SARS-CoV
S	ANPEP	4	HCoV-229E PEDV PRCV TGEV
N	HNRNPU	3	HCoV-OC43 IBV TGEV
N	PABPC1	3	HCoV-OC43 IBV SARS-CoV-2
N	RPL26	3	HCoV-OC43 IBV TGEV
NSP14	DDX1	3	SARS-CoV IBV TGEV
NSP2	GIGYF2	3	MHV SARS-CoV SARS-CoV-2
NSP3	ISG15	3	MHV SARS-CoV MERS-CoV
NSP3	RCHY1	3	HCoV-NL63 SARS-CoV MERS-CoV
S	ACE2	3	HCoV-NL63 SARS-CoV SARS-CoV-2
S	CTSL	3	MHV PEDV SARS-CoV
S	TMPRSS11D	3	HCoV-229E MERS-CoV SARS-CoV
S	TMPRSS2	3	MERS-CoV SARS-CoV HCoV-229E
S	TUBB2A	3	HCoV-229E HCoV-NL63 TGEV
M	TRAF3	2	SARS-CoV HCoV-HKU1
N	DDX1	2	IBV TGEV
N	DDX21	2	IBV SARS-CoV-2
N	DHX9	2	IBV TGEV
N	EEF1A1	2	SARS-CoV TGEV
N	FAM98A	2	IBV SARS-CoV-2
N	G3BP1	2	IBV SARS-CoV-2
N	G3BP2	2	IBV SARS-CoV-2
N	GSK3A	2	IBV SARS-CoV
N	GSK3B	2	IBV SARS-CoV
N	LARP1	2	IBV SARS-CoV-2
N	MOV10	2	IBV SARS-CoV-2
N	MYH9	2	IBV TGEV
N	NCL	2	IBV HCoV-OC43
N	PABPC4	2	IBV SARS-CoV-2
N	PRKRA	2	MHV SARS-CoV
N	RPS13	2	IBV TGEV
N	RPS19	2	IBV HCoV-OC43
N	RPS9	2	IBV TGEV
N	UPF1	2	IBV SARS-CoV-2
N	XRCC5	2	IBV HCoV-OC43
N	XRCC6	2	IBV HCoV-OC43
N	YBX1	2	IBV HCoV-OC43
NSP13	POLD1	2	IBV SARS-CoV
NSP2	EIF4E2	2	SARS-CoV SARS-CoV-2
NSP2	POR	2	MHV SARS-CoV-2
NSP2	SLC1A5	2	MHV SARS-CoV
NSP3	IRF3	2	MHV SARS-CoV
NSP3	STING1	2	HCoV-NL63 SARS-CoV
NSP3	TBK1	2	MHV SARS-CoV
ORF9B	MARK3	2	SARS-CoV SARS-CoV-2
S	CTSB	2	MHV PEDV
S	EIF3F	2	IBV SARS-CoV
S	FURIN	2	MERS-CoV IBV
S	TUBA4A	2	HCoV-229E TGEV
S	TUBB4A	2	HCoV-229E TGEV
S	TUBB6	2	HCoV-229E TGEV

## Sheet: Table S5
	MHV	SARS-CoV-2	SARS-CoV	IBV	PEDV	TGEV	MERS-CoV	HCoV-OC43	HCoV-229E	HCoV-NL63	PDCov	HCoV-HKU1	PRCV	TOTAL
TBK1	1	1	2		1		1							5		Matrix of host proteins targeted by multiple viruses
HNRNPA1	1		1	1	1			1						5		For each virus, the number of distinct viral proteins targeting the corresponding host protein are indicated in red-colored cells
DDX1	1		1	2		2								4
ANPEP					1	1			1				1	4
MARK3	1	1	2											3
GIGYF2	1	1	1											3
MARK2	1	1	1											3
G3BP1	1	1		1										3
LARP1	1	1		1										3
EIF3F	1		1	1										3
CTSL	1		1		1									3
ISG15	1		1				1							3
PRKRA	1		1				1							3
ACE2		1	1							1				3
PABPC1		1		1				1						3
TRAF3			3								1	1		3
IKBKE			2		1		1							3
TMPRSS11D			1				1		1					3
TMPRSS2			1				1		1					3
RCHY1			1				1			1				3
HNRNPU				1		1		1						3
RPL26				1		1		1						3
TUBB2A						1			1	1				3
AP3B1	1	1												2
CLCC1	1	1												2
CSDE1	1	1												2
CYB5R3	1	1												2
HECTD1	1	1												2
MARK1	1	1												2
MEPCE	1	1												2
PDE4DIP	1	1												2
POR	1	1												2
PRKAR2B	1	1												2
RAB5C	1	1												2
RTN4	1	1												2
SRP54	1	1												2
UBAP2	1	1												2
UBAP2L	1	1												2
UBXN8	1	1												2
SPART	1	1												2
IRF3	1		3											2
SNAP47	1		2											2
BTF3	1		1											2
CKAP5	1		1											2
DNM1L	1		1											2
EIF4B	1		1											2
EZR	1		1											2
KPNB1	1		1											2
POLR2B	1		1											2
SDCBP	1		1											2
SGTA	1		1											2
SLC1A5	1		1											2
TBCB	1		1											2
ATXN2L	1			1										2
FUS	1			1										2
HDLBP	1			1										2
HNRNPD	1			1										2
HNRNPF	1			1										2
IGF2BP1	1			1										2
RBM14	1			1										2
RPL13A	1			1										2
SERBP1	1			1										2
SSB	1			1										2
USP10	1			1										2
YTHDF2	1			1										2
SYNCRIP	1			1										2
CTSB	1				1									2
TANC1	1				1									2
VPS36	1				1									2
EIF2A	1					1								2
FLNA	1					1								2
KPNA3	1						1							2
BZW2		1	1											2
EIF4E2		1	1											2
SMOC1		1	1											2
STOML2		1	1											2
DDX21		1		1										2
FAM98A		1		1										2
G3BP2		1		1										2
MOV10		1		1										2
PABPC4		1		1										2
UPF1		1		1										2
DDX5			1	1										2
GSK3A			1	1										2
GSK3B			1	1										2
POLD1			1	1										2
RPS17			1	1										2
IKBKB			1		1									2
EEF1A1			1			1								2
STING1			1							1				2
DDX58			1								2			2
DHX9				1		1								2
MYH9				1		1								2
RPS13				1		1								2
RPS9				1		1								2
FURIN				1			1							2
NCL				1				1						2
RPS19				1				1						2
XRCC5				1				1						2
XRCC6				1				1						2
YBX1				1				1						2
TUBA4A						1			1					2
TUBB4A						1			1					2
TUBB6						1			1					2
IFIH1							1				2			2

## Sheet: Table S6
ENRICHED KEGG PATHWAYS
RIBOSOME	ENDOCYTOSIS	PROTEIN PROCESSING IN ENDOPLASMIC RETICULUM	RNA TRANSPORT	PHAGOSOME	SPLICEOSOME	RIG-I-LIKE RECEPTOR SIGNALING PATHWAY
MRPS2	ARF6	BCL2	ALYREF	ATP6V1A	ALYREF	DDX3X
MRPS5	ARFGAP1	DNAJC10	FXR1	ATP6V1G1	DDX5	DDX58
RSL24D1	ARFGAP2	EDEM3	RANBP2	ATP6AP1	DHX15	ISG15
RPL10	AGAP1	NGLY1	RANGAP1	CLEC4M	RBMXL2	NLRX1
RPL10A	AGAP3	NSFL1C	SEC13	CD209	RBMX	TBK1
RPL11	ARAP1	OS9	UPF1	RAB5C	SLU7	TBKBP1
RPL12	ASAP1	SEC13	EEF1A1	RAB7A	BCAS2	TRAF2
RPL13	DAB2	SEC24B	EIF2B3	SEC22B	HSPA1A	TRAF3
RPL13A	EHD2	SEC24D	EIF3E	ACTB	HNRNPA1	TRAF6
RPL14	RAB10	SEC63	EIF3F	CANX	HNRNPA3	IKBKB
RPL15	RAB11FIP5	SIL1	EIF3I	CTSL	HNRNPC	IKBKE
RPL17	RAB5C	STT3B	EIF4G1	DYNC1LI1	HNRNPK	IKBKG
RPL18A	RAB7A	TRAF2	EIF4G2	DYNC1LI2	HNRNPM	IFIH1
RPL19	RAB8A	UGGT2	EIF4G3	HGS	HNRNPU	IRF3
RPL21	RUFY1	ATF6	EIF4A2	ITGB1	PPIH	MAVS
RPL22L1	SH3GL1	CANX	EIF4B	SCARB1	PUF60	RIPK1
RPL22	SH3KBP1	CAPN1	EIF4E2	SFTPD	PRPF31
RPL23	SMAD3	CASP12	EIF5	STX18	SRSF1
RPL23A	TRAF6	ERLEC1	XPO1	TFRC	SRSF2
RPL24	AP2A2	ERO1B	FMR1	TAP1	SRSF3
RPL26	AP2M1	EIF2AK3	KPNB1	TAP2	SRSF4
RPL27	BIN1	GANAB	NUP210	TUBA4A	SRSF7
RPL27A	CAV1	HSPA1A	NUP214	TUBB2A	SNRPD3
RPL3	CHMP2A	HSPA5	NUP54	TUBB4A	SNRPE
RPL30	CHMP2B	HSPH1	NUP58	TUBB6
RPL31	CHMP4B	HYOU1	NUP62	TUBB
RPL35	CHMP7	LMAN1	NUP88
RPL36	EGFR	LMAN2	NUP98
RPL4	GBF1	MOGS	PABPC1
RPL5	HSPA1A	PLAA	PABPC4
RPL7	HGS	PREB	RPP38
RPL8	PARD3	RRBP1	RAE1
RPL9	PDCD6IP	RBX1	UBE2I
RPS10	RHOA	SELENOS
RPS11	RNF41	SSR3
RPS12	STAM2	UBE2J1
RPS13	SMAP1	WFS1
RPS14	SNX1
RPS15	SNX2
RPS15A	SNX5
RPS16	SNX6
RPS17	TFRC
RPS18	VPS36
RPS19
RPS4
RPS20
RPS23
RPS24
RPS25
RPS26
RPS27A
RPS29
RPS3
RPS3A
RPS5
RPS7
RPS8
RPS9
RPSA
RPLP1

## Sheet: Table S7
ALL DATASET			ALL DATASET EXCEPT INTERACTORS OF S (SPIKE)			Lists of host proteins present in Supplementary Table 1 with or without interactors of S (left and right Tables, respectively)
CELLULAR PROTEIN (Uniprot)	OCCURRENCE		CELLULAR PROTEIN (Uniprot)	OCCURRENCE		"Occurrence" is the number of times a protein is reported in Supplementary Table 1.
ACE2	20		HNRNPA1	14		High "occurrence" scores reflect the repeated identification of the corresponding host protein
DPP4	18		TBK1	11
HNRNPA1	14		DDX1	10
ANPEP	11		SERPING1	9
TBK1	11		TRAF3	9
DDX1	10		EEF1A1	8
SERPING1	9		ISG15	8
TRAF3	9		RCHY1	8
EEF1A1	8		DCTN2	7
EIF3F	8		DDX58	7
ISG15	8		IKBKE	7
RCHY1	8		IRF3	7
DCTN2	7		PRKRA	7
DDX58	7		MARK3	6
IKBKE	7		POLD1	6
IRF3	7		PPIA	6
PRKRA	7		STING1	6
MARK3	6		BCL2L1	5
POLD1	6		PABPC1	5
PPIA	6		SDCBP	5
STING1	6		SGTA	5
BCL2L1	5		SNAP47	5
PABPC1	5		ATP6V1G1	4
SDCBP	5		CAV1	4
SGTA	5		CHMP2B	4
SNAP47	5		DDX5	4
TMPRSS2	5		EIF4A2	4
ATP6V1G1	4		FKBP1A	4
CAV1	4		G3BP1	4
CHMP2B	4		GSK3A	4
DDX5	4		GSK3B	4
EIF4A2	4		HNRNPU	4
EZR	4		IFIH1	4
FKBP1A	4		IKBKB	4
G3BP1	4		MARK2	4
GSK3A	4		RYBP	4
GSK3B	4		UBE2I	4
HNRNPU	4		VIM	4
IFIH1	4		VPS36	4
IKBKB	4		ACTB	3
MARK2	4		BTF3	3
RYBP	4		CAMK2D	3
UBE2I	4		G3BP2	3
VIM	4		GIGYF2	3
VPS36	4		KPNB1	3
ACTB	3		LARP1	3
BTF3	3		LAS1L	3
CAMK2D	3		MPP5	3
CTSL	3		NCL	3
FLNA	3		NPIPB3	3
FURIN	3		PFDN5	3
G3BP2	3		RB1	3
GIGYF2	3		RPL26	3
HSPA5	3		ABHD17A	2
KPNB1	3		ACTN4	2
LARP1	3		AGAP3	2
LAS1L	3		AP3B1	2
MPP5	3		APOBEC3C	2
NCL	3		ATF5	2
NPIPB3	3		ATF6	2
PFDN5	3		ATXN2L	2
RB1	3		BAG6	2
RPL26	3		BZW2	2
TMPRSS11D	3		CAMLG	2
TUBB2A	3		CEP85	2
UBXN1	3		CHEK2	2
ABHD17A	2		CKAP5	2
ACTN4	2		CLCC1	2
AGAP3	2		CSDE1	2
AP3B1	2		CYB5R3	2
APOBEC3C	2		DDAH2	2
ATF5	2		DDX21	2
ATF6	2		DHX9	2
ATXN2L	2		DNM1L	2
BAG6	2		EIF2A	2
BZW2	2		EIF4B	2
CAMLG	2		EIF4E2	2
CEACAM1	2		FAM98A	2
CEACAM5	2		FBF1	2
CEP85	2		FUS	2
CHEK2	2		HDLBP	2
CKAP5	2		HECTD1	2
CLCC1	2		HGS	2
CSDE1	2		HNRNPA2B1	2
CTSB	2		HNRNPD	2
CYB5R3	2		HNRNPF	2
DDAH2	2		IFTAP	2
DDX21	2		IGF2BP1	2
DHX9	2		IKBKG	2
DNM1L	2		KPNA2	2
EIF2A	2		KPNA3	2
EIF4B	2		MACROH2A2	2
EIF4E2	2		MARK1	2
FAM98A	2		MAVS	2
FBF1	2		MEPCE	2
FUS	2		MIF4GD	2
HDLBP	2		MKRN2	2
HECTD1	2		MKRN3	2
HGS	2		MOV10	2
HNRNPA2B1	2		MPRIP	2
HNRNPD	2		MT-CO2	2
HNRNPF	2		MT-ND4L	2
IFTAP	2		MYH9	2
IGF2BP1	2		N4BP2L2	2
IKBKG	2		NDUFA10	2
KPNA2	2		NOMO3	2
KPNA3	2		NONO	2
MACROH2A2	2		NPHP3	2
MARK1	2		NPM1	2
MAVS	2		PABPC4	2
MEPCE	2		PDE4DIP	2
MIF4GD	2		PHB	2
MKRN2	2		PHB2	2
MKRN3	2		POLR2B	2
MOV10	2		POR	2
MPRIP	2		PPIG	2
MT-CO2	2		PPIH	2
MT-ND4L	2		PPP1CA	2
MYH9	2		PRKAR2B	2
N4BP2L2	2		PSMA2	2
NDUFA10	2		PYCARD	2
NOMO3	2		RAB5C	2
NONO	2		RBM14	2
NPHP3	2		RCAN3	2
NPM1	2		RPL13A	2
PABPC4	2		RPL19	2
PDE4DIP	2		RPS13	2
PHB	2		RPS17	2
PHB2	2		RPS19	2
POLR2B	2		RPS20	2
POR	2		RPS9	2
PPIG	2		RTN4	2
PPIH	2		SERBP1	2
PPP1CA	2		SLC1A5	2
PRKAR2B	2		SMOC1	2
PSMA2	2		SPART	2
PYCARD	2		SRP54	2
RAB5C	2		SSB	2
RBM14	2		STOML2	2
RCAN3	2		SYNCRIP	2
RPL13A	2		TANC1	2
RPL19	2		TBCB	2
RPS13	2		TERF1	2
RPS17	2		TPSAB1	2
RPS19	2		TUBB	2
RPS20	2		UBAP2	2
RPS9	2		UBAP2L	2
RTN4	2		UBXN8	2
SERBP1	2		UPF1	2
SLC1A5	2		USP10	2
SMOC1	2		VKORC1	2
SPART	2		XRCC5	2
SRP54	2		XRCC6	2
SSB	2		YBX1	2
STOML2	2		YTHDF2	2
SYNCRIP	2		YWHAE	2
TANC1	2		2310022B05RIK	1
TBCB	2		AACS	1
TERF1	2		AAK1	1
TFRC	2		AAR2	1
TMPRSS11E	2		AASS	1
TMPRSS13	2		AATF	1
TPSAB1	2		ABCC1	1
TUBA4A	2		ABHD16A	1
TUBB	2		ABR	1
TUBB4A	2		ACAD9	1
TUBB6	2		ACADM	1
UBAP2	2		ACBD3	1
UBAP2L	2		ACBD5	1
UBXN8	2		ACSL3	1
UPF1	2		ACSL5	1
USP10	2		ACTN2	1
VKORC1	2		ADA	1
XRCC5	2		ADAM9	1
XRCC6	2		ADAMTS1	1
YBX1	2		ADAMTSL3	1
YTHDF2	2		ADD3	1
YWHAE	2		ADK	1
2310022B05RIK	1		ADNP	1
AACS	1		AFDN	1
AAK1	1		AGAP1	1
AAR2	1		AGFG1	1
AASS	1		AGO2	1
AATF	1		AGPS	1
ABCC1	1		AHNAK	1
ABHD16A	1		AKAP8	1
ABR	1		AKAP8L	1
ACAD9	1		AKAP9	1
ACADM	1		ALB	1
ACBD3	1		ALDH3A2	1
ACBD5	1		ALG11	1
ACSL3	1		ALG5	1
ACSL5	1		ALG8	1
ACTN2	1		ALYREF	1
ADA	1		ANAPC1	1
ADAM9	1		ANKLE2	1
ADAMTS1	1		ANKRD11	1
ADAMTSL3	1		ANKRD17	1
ADD3	1		ANO6	1
ADK	1		AP1G1	1
ADNP	1		AP1M1	1
AFDN	1		AP2A2	1
AGAP1	1		AP2M1	1
AGFG1	1		APBA3	1
AGO2	1		APBB2	1
AGPS	1		APOBEC3F	1
AHNAK	1		APOBEC3H	1
AKAP8	1		APOBR	1
AKAP8L	1		ARAP1	1
AKAP9	1		ARF6	1
ALB	1		ARFGAP1	1
ALDH3A2	1		ARFGAP2	1
ALG11	1		ARFIP1	1
ALG5	1		ARHGAP1	1
ALG8	1		ARHGAP35	1
ALYREF	1		ARHGAP5	1
ANAPC1	1		ARHGDIB	1
ANKLE2	1		ARHGEF18	1
ANKRD11	1		ARL4D	1
ANKRD17	1		ARL6IP6	1
ANO6	1		ARPIN	1
AP1G1	1		AS3MT	1
AP1M1	1		ASAP1	1
AP2A2	1		ASCC3	1
AP2M1	1		ASPSCR1	1
APBA3	1		ATAD2B	1
APBB2	1		ATE1	1
APOBEC3F	1		ATG2B	1
APOBEC3H	1		ATP13A3	1
APOBR	1		ATP1B1	1
ARAP1	1		ATP2B4	1
ARF6	1		ATP5MG	1
ARFGAP1	1		ATP6AP1	1
ARFGAP2	1		ATP6V1A	1
ARFIP1	1		ATPAF2	1
ARHGAP1	1		ATXN10	1
ARHGAP35	1		ATXN2	1
ARHGAP5	1		AVL9	1
ARHGDIB	1		BAG3	1
ARHGEF18	1		BAG5	1
ARL4D	1		BAP1	1
ARL6IP6	1		BCAR3	1
ARPIN	1		BCAS2	1
AS3MT	1		BCKDK	1
ASAP1	1		BCL2	1
ASCC3	1		BCL2A1	1
ASPSCR1	1		BCL2L2	1
ATAD2B	1		BCS1L	1
ATE1	1		BET1	1
ATG2B	1		BIN1	1
ATP13A3	1		BIRC6	1
ATP1B1	1		BLM	1
ATP2B4	1		BPNT1	1
ATP5MG	1		BRD2	1
ATP6AP1	1		BRD4	1
ATP6V1A	1		BRF1	1
ATPAF2	1		C1ORF50	1
ATXN10	1		C20ORF27	1
ATXN2	1		CALD1	1
AVL9	1		CALM1	1
BAG3	1		CAMK2G	1
BAG5	1		CANX	1
BAP1	1		CAP1	1
BCAR3	1		CAPN1	1
BCAS2	1		CAPRIN1	1
BCKDK	1		CASP12	1
BCL2	1		CAST	1
BCL2A1	1		CAVIN1	1
BCL2L2	1		CBX3	1
BCS1L	1		CCDC47	1
BET1	1		CCDC59	1
BIN1	1		CCDC86	1
BIRC6	1		CCHCR1	1
BLM	1		CCNL1	1
BPNT1	1		CCT8	1
BRD2	1		CDC37	1
BRD4	1		CDK12	1
BRF1	1		CDK5RAP2	1
C1ORF50	1		CDK5RAP3	1
C20ORF27	1		CDKAL1	1
CALD1	1		CDV3	1
CALM1	1		CENPF	1
CAMK2G	1		CEP112	1
CANX	1		CEP135	1
CAP1	1		CEP170	1
CAPN1	1		CEP250	1
CAPRIN1	1		CEP350	1
CASP12	1		CEP43	1
CAST	1		CEP44	1
CAVIN1	1		CEP68	1
CBX3	1		CERT1	1
CCDC47	1		CFAP36	1
CCDC59	1		CGRRF1	1
CCDC86	1		CHAF1A	1
CCHCR1	1		CHD7	1
CCNL1	1		CHMP2A	1
CCT8	1		CHMP4B	1
CD209	1		CHMP7	1
CDC37	1		CHPF	1
CDK12	1		CHPF2	1
CDK5RAP2	1		CIAPIN1	1
CDK5RAP3	1		CIP2A	1
CDKAL1	1		CISD3	1
CDV3	1		CIT	1
CENPF	1		CLINT1	1
CEP112	1		CLIP4	1
CEP135	1		CNN3	1
CEP170	1		CNTRL	1
CEP250	1		COBLL1	1
CEP350	1		COL6A1	1
CEP43	1		COLGALT1	1
CEP44	1		COMT	1
CEP68	1		COPB2	1
CERT1	1		COPG2	1
CFAP36	1		COQ8B	1
CGRRF1	1		CPNE3	1
CHAF1A	1		CRIP2	1
CHD7	1		CRK	1
CHMP2A	1		CRKL	1
CHMP4B	1		CRTC3	1
CHMP7	1		CSE1L	1
CHPF	1		CSNK2A2	1
CHPF2	1		CSNK2B	1
CIAPIN1	1		CTBP2	1
CIP2A	1		CTNND1	1
CISD3	1		CTTN	1
CIT	1		CUL2	1
CLEC4M	1		CUL4B	1
CLINT1	1		CUL5	1
CLIP4	1		CWC27	1
CNN3	1		CYB5B	1
CNTRL	1		CYP20A1	1
COBLL1	1		CYP4B1	1
COL6A1	1		CYP51A1	1
COLGALT1	1		DAB2	1
COMT	1		DARS2	1
COPB2	1		DBNL	1
COPG2	1		DCAF7	1
COQ8B	1		DCAKD	1
CORIN	1		DCTPP1	1
CPNE3	1		DDHD2	1
CRIP2	1		DDIT4L	1
CRK	1		DDRGK1	1
CRKL	1		DDX10	1
CRTC3	1		DDX17	1
CSE1L	1		DDX3X	1
CSNK2A2	1		DDX3Y	1
CSNK2B	1		DDX6	1
CTBP2	1		DEDD2	1
CTNND1	1		DHRS13	1
CTTN	1		DHRS9	1
CUL2	1		DHX15	1
CUL4B	1		DHX30	1
CUL5	1		DHX33	1
CWC27	1		DHX36	1
CYB5B	1		DHX57	1
CYP20A1	1		DIDO1	1
CYP4B1	1		DLGAP5	1
CYP51A1	1		DNAJC10	1
DAB2	1		DNAJC11	1
DARS2	1		DNAJC19	1
DBNL	1		DNAJC2	1
DCAF7	1		DNMT1	1
DCAKD	1		DOK1	1
DCTPP1	1		DPH5	1
DDHD2	1		DPY19L1	1
DDIT4L	1		DPYSL2	1
DDRGK1	1		DST	1
DDX10	1		DVL1	1
DDX17	1		DVL2	1
DDX3X	1		DVL3	1
DDX3Y	1		DYNC1LI1	1
DDX6	1		DYNC1LI2	1
DEDD2	1		DZANK1	1
DHRS13	1		DZIP1	1
DHRS9	1		ECD	1
DHX15	1		ECSIT	1
DHX30	1		EDC4	1
DHX33	1		EDEM3	1
DHX36	1		EFHD2	1
DHX57	1		EFL1	1
DIDO1	1		EHBP1	1
DLGAP5	1		EHD2	1
DNAJC10	1		EIF2AK3	1
DNAJC11	1		EIF2B3	1
DNAJC19	1		EIF3E	1
DNAJC2	1		EIF3F	1
DNMT1	1		EIF3I	1
DOK1	1		EIF3M	1
DPH5	1		EIF4ENIF1	1
DPY19L1	1		EIF4G1	1
DPYSL2	1		EIF4G2	1
DST	1		EIF4G3	1
DVL1	1		EIF4H	1
DVL2	1		EIF5	1
DVL3	1		ELAVL1	1
DYNC1LI1	1		ELOB	1
DYNC1LI2	1		ELOC	1
DZANK1	1		ELP4	1
DZIP1	1		EMC1	1
ECD	1		EMD	1
ECSIT	1		ENO1	1
EDC4	1		ENO3	1
EDEM3	1		EPB41	1
EFHD2	1		EPHX1	1
EFL1	1		EPS8L2	1
EGFR	1		ERC1	1
EHBP1	1		ERCC6L	1
EHD2	1		ERGIC1	1
EIF2AK3	1		ERLEC1	1
EIF2B3	1		ERMP1	1
EIF3E	1		ERO1B	1
EIF3I	1		ERP44	1
EIF3M	1		ETFA	1
EIF4ENIF1	1		EXOSC2	1
EIF4G1	1		EXOSC3	1
EIF4G2	1		EXOSC5	1
EIF4G3	1		EXOSC8	1
EIF4H	1		EYA3	1
EIF5	1		EZR	1
ELAVL1	1		F2RL1	1
ELOB	1		FAF2	1
ELOC	1		FAHD1	1
ELP4	1		FAM114A1	1
EMC1	1		FAM114A2	1
EMD	1		FAM133B	1
ENO1	1		FAM13C	1
ENO3	1		FAM162A	1
EPB41	1		FAM184A	1
EPHX1	1		FAM8A1	1
EPS8L2	1		FAM91A1	1
ERC1	1		FAR2	1
ERCC6L	1		FASTKD5	1
ERGIC1	1		FBLN5	1
ERLEC1	1		FBN1	1
ERMP1	1		FBN2	1
ERO1B	1		FBXL12	1
ERP44	1		FBXO22	1
ETFA	1		FBXO4	1
EXOSC2	1		FGG	1
EXOSC3	1		FIP1L1	1
EXOSC5	1		FKBP10	1
EXOSC8	1		FKBP15	1
EYA3	1		FKBP5	1
F2RL1	1		FKBP7	1
FAF2	1		FKBP8	1
FAHD1	1		FLNA	1
FAM114A1	1		FMR1	1
FAM114A2	1		FNDC3B	1
FAM133B	1		FOXRED2	1
FAM13C	1		FPGS	1
FAM162A	1		FXR1	1
FAM184A	1		FYCO1	1
FAM8A1	1		FZD6	1
FAM91A1	1		GAG	1
FAR2	1		GALNT2	1
FASTKD5	1		GANAB	1
FBLN5	1		GAPVD1	1
FBN1	1		GBF1	1
FBN2	1		GCC1	1
FBXL12	1		GCC2	1
FBXO22	1		GCN1	1
FBXO4	1		GDF15	1
FGG	1		GEN1	1
FIP1L1	1		GFER	1
FKBP10	1		GGCX	1
FKBP15	1		GGH	1
FKBP5	1		GHITM	1
FKBP7	1		GLA	1
FKBP8	1		GLMN	1
FMR1	1		GM38495	1
FNDC3B	1		GNB1	1
FOXRED2	1		GNE	1
FPGS	1		GNG5	1
FXR1	1		GOLGA2	1
FYCO1	1		GOLGA3	1
FZD6	1		GOLGB1	1
GAG	1		GORASP1	1
GALNT2	1		GORASP2	1
GANAB	1		GPAA1	1
GAPVD1	1		GPAT3	1
GBF1	1		GPX1	1
GCC1	1		GPX4	1
GCC2	1		GRIPAP1	1
GCN1	1		GRPEL1	1
GDF15	1		GSN	1
GEN1	1		GSPT1	1
GFER	1		GSTP1	1
GGCX	1		GTF2F2	1
GGH	1		GTF3C4	1
GHITM	1		GTF3C5	1
GLA	1		H1-10	1
GLMN	1		H1-2	1
GM38495	1		H1-3	1
GNB1	1		H2AX	1
GNE	1		HAUS6	1
GNG5	1		HCLS1	1
GOLGA2	1		HDAC2	1
GOLGA3	1		HEATR3	1
GOLGA7	1		HEATR5A	1
GOLGB1	1		HEATR6	1
GORASP1	1		HELB	1
GORASP2	1		HELZ2	1
GPAA1	1		HID1	1
GPAT3	1		HINT1	1
GPX1	1		HM13	1
GPX4	1		HMOX1	1
GRIPAP1	1		HMOX2	1
GRPEL1	1		HNRNPA0	1
GSN	1		HNRNPA3	1
GSPT1	1		HNRNPAB	1
GSTP1	1		HNRNPC	1
GTF2F2	1		HNRNPDL	1
GTF3C4	1		HNRNPH1	1
GTF3C5	1		HNRNPH3	1
H1-10	1		HNRNPK	1
H1-2	1		HNRNPL	1
H1-3	1		HNRNPM	1
H2AX	1		HNRNPR	1
HAUS6	1		HOMER3	1
HCLS1	1		HOOK1	1
HDAC2	1		HOXC6	1
HEATR3	1		HS2ST1	1
HEATR5A	1		HS6ST2	1
HEATR6	1		HSBP1	1
HELB	1		HSD17B4	1
HELZ2	1		HSPA1A	1
HID1	1		HSPH1	1
HINT1	1		HTRA2	1
HM13	1		HYOU1	1
HMOX1	1		IDE	1
HMOX2	1		IFRD1	1
HNRNPA0	1		IGBP1	1
HNRNPA3	1		IGF2BP3	1
HNRNPAB	1		IL17RA	1
HNRNPC	1		ILF2	1
HNRNPDL	1		ILF3	1
HNRNPH1	1		ILK	1
HNRNPH3	1		IMPDH2	1
HNRNPK	1		INF2	1
HNRNPL	1		INHBE	1
HNRNPM	1		INTS4	1
HNRNPR	1		IPO5	1
HOMER3	1		IPO7	1
HOOK1	1		IPO9	1
HOXC6	1		IRAG1	1
HS2ST1	1		IRS1	1
HS6ST2	1		IRS2	1
HSBP1	1		ISLR	1
HSD17B4	1		ISYNA1	1
HSPA1A	1		ITGB1	1
HSPH1	1		ITPR3	1
HTRA2	1		ITPRIP	1
HYOU1	1		ITPRIPL1	1
IDE	1		JAKMIP1	1
IFRD1	1		JPT2	1
IGBP1	1		KANK2	1
IGF2BP3	1		KAT7	1
IL17RA	1		KHDRBS1	1
ILF2	1		KIF11	1
ILF3	1		KIF13B	1
ILK	1		KIF15	1
IMPDH2	1		KIF2A	1
INF2	1		KIFC3	1
INHBE	1		KLHL8	1
INTS4	1		KMT2D	1
IPO5	1		KNTC1	1
IPO7	1		KPNA4	1
IPO9	1		LARP4	1
IRAG1	1		LARP4B	1
IRS1	1		LARP7	1
IRS2	1		LCP1	1
ISLR	1		LDAH	1
ISYNA1	1		LEMD3	1
ITGB1	1		LIMA1	1
ITPR3	1		LMAN1	1
ITPRIP	1		LMAN2	1
ITPRIPL1	1		LMCD1	1
JAKMIP1	1		LNPK	1
JPT2	1		LOX	1
KANK2	1		LPIN3	1
KAT7	1		LPP	1
KHDRBS1	1		LRCH3	1
KIF11	1		LRPPRC	1
KIF13B	1		LRRC57	1
KIF15	1		LRRC59	1
KIF2A	1		LRRFIP1	1
KIFC3	1		LUC7L	1
KLHL8	1		LYPLA2	1
KMT2D	1		MAGI3	1
KNTC1	1		MAK16	1
KPNA4	1		MAP2K1	1
LARP4	1		MAP4K5	1
LARP4B	1		MAP7D1	1
LARP7	1		MAPRE2	1
LCP1	1		MARCHF10	1
LDAH	1		MAT2A	1
LEMD3	1		MAT2B	1
LIMA1	1		MCL1	1
LMAN1	1		MCM2	1
LMAN2	1		MCOLN2	1
LMCD1	1		MDN1	1
LNPK	1		MFGE8	1
LOX	1		MIB1	1
LPIN3	1		MICAL2	1
LPP	1		MINK1	1
LRCH3	1		MIPOL1	1
LRPPRC	1		MNAT1	1
LRRC57	1		MOGS	1
LRRC59	1		MON1A	1
LRRFIP1	1		MON2	1
LUC7L	1		MPHOSPH10	1
LYPLA2	1		MPP1	1
MAGI3	1		MRE11	1
MAK16	1		MRPS2	1
MAP2K1	1		MRPS25	1
MAP4K5	1		MRPS27	1
MAP7D1	1		MRPS5	1
MAPRE2	1		MSTO1	1
MARCHF10	1		MT-CO1	1
MAT2A	1		MTARC1	1
MAT2B	1		MTCH1	1
MCL1	1		MTMR3	1
MCM2	1		MVP	1
MCOLN2	1		MXRA7	1
MDN1	1		MYCBP2	1
MFGE8	1		MYH10	1
MIB1	1		MYL6	1
MICAL2	1		MYO18A	1
MINK1	1		MYO5A	1
MIPOL1	1		MYO9B	1
MNAT1	1		NAA15	1
MOGS	1		NACA	1
MON1A	1		NAE1	1
MON2	1		NANS	1
MPHOSPH10	1		NAP1L1	1
MPP1	1		NAP1L4	1
MRE11	1		NARS2	1
MRPS2	1		NAT14	1
MRPS25	1		NBAS	1
MRPS27	1		NCK1	1
MRPS5	1		NCOA5	1
MSTO1	1		NDFIP2	1
MT-CO1	1		NDRG1	1
MTARC1	1		NDUFA13	1
MTCH1	1		NDUFAF1	1
MTMR3	1		NDUFAF2	1
MVP	1		NDUFB9	1
MXRA7	1		NEK9	1
MYCBP2	1		NEU1	1
MYH10	1		NFIX	1
MYL6	1		NGDN	1
MYO18A	1		NGLY1	1
MYO5A	1		NIBAN1	1
MYO9B	1		NIN	1
NAA15	1		NINL	1
NACA	1		NIPBL	1
NAE1	1		NLRX1	1
NANS	1		NMB	1
NAP1L1	1		NMT1	1
NAP1L4	1		NOL10	1
NARS2	1		NPC2	1
NAT14	1		NPTX1	1
NBAS	1		NSD2	1
NCK1	1		NSFL1C	1
NCOA5	1		NT5C2	1
NDFIP2	1		NUDC	1
NDRG1	1		NUDCD1	1
NDUFA13	1		NUDCD2	1
NDUFAF1	1		NUDCD3	1
NDUFAF2	1		NUDT5	1
NDUFB9	1		NUFIP2	1
NEK9	1		NUMBL	1
NEU1	1		NUP210	1
NFIX	1		NUP214	1
NGDN	1		NUP54	1
NGLY1	1		NUP58	1
NIBAN1	1		NUP62	1
NIN	1		NUP88	1
NINL	1		NUP98	1
NIPBL	1		NUTF2	1
NLRX1	1		OBI1	1
NMB	1		OCIAD2	1
NMT1	1		OLA1	1
NOL10	1		OS9	1
NPC2	1		OSBPL11	1
NPTX1	1		OSBPL8	1
NSD2	1		OSBPL9	1
NSFL1C	1		OTUD7B	1
NT5C2	1		PAK1	1
NUDC	1		PAK2	1
NUDCD1	1		PALD1	1
NUDCD2	1		PARD3	1
NUDCD3	1		PARP1	1
NUDT5	1		PARP10	1
NUFIP2	1		PASK	1
NUMBL	1		PCBP2	1
NUP210	1		PCM1	1
NUP214	1		PCNT	1
NUP54	1		PCSK6	1
NUP58	1		PCYT2	1
NUP62	1		PDAP1	1
NUP88	1		PDCD6IP	1
NUP98	1		PDCL	1
NUTF2	1		PDE12	1
OBI1	1		PDLIM5	1
OCIAD2	1		PDXDC1	1
OLA1	1		PDZD11	1
OS9	1		PDZD8	1
OSBPL11	1		PEX14	1
OSBPL8	1		PGRMC2	1
OSBPL9	1		PIAS1	1
OTUD7B	1		PICALM	1
PAK1	1		PIGO	1
PAK2	1		PIGS	1
PALD1	1		PITRM1	1
PARD3	1		PKMYT1	1
PARP1	1		PKP2	1
PARP10	1		PLAA	1
PASK	1		PLAT	1
PCBP2	1		PLAU	1
PCM1	1		PLD3	1
PCNT	1		PLEKHA5	1
PCSK6	1		PLEKHF1	1
PCYT2	1		PLEKHF2	1
PDAP1	1		PLEKHO1	1
PDCD6IP	1		PLIN3	1
PDCL	1		PLIN4	1
PDE12	1		PLOD2	1
PDLIM5	1		PMPCA	1
PDXDC1	1		PMPCB	1
PDZD11	1		PNMA2	1
PDZD8	1		POFUT1	1
PEX14	1		POGLUT2	1
PGRMC2	1		POGLUT3	1
PIAS1	1		POLA1	1
PICALM	1		POLA2	1
PIGO	1		PON3	1
PIGS	1		PPA1	1
PITRM1	1		PPID	1
PKMYT1	1		PPIL3	1
PKP2	1		PPME1	1
PLAA	1		PPP2R5D	1
PLAT	1		PPT1	1
PLAU	1		PRAF2	1
PLD3	1		PREB	1
PLEKHA5	1		PRIM1	1
PLEKHF1	1		PRIM2	1
PLEKHF2	1		PRKAB1	1
PLEKHO1	1		PRKACA	1
PLIN3	1		PRKAR1B	1
PLIN4	1		PRKAR2A	1
PLOD2	1		PRMT7	1
PMPCA	1		PRPF31	1
PMPCB	1		PRR11	1
PNMA2	1		PRRC2B	1
POFUT1	1		PRRC2C	1
POGLUT2	1		PRUNE1	1
POGLUT3	1		PSMB3	1
POLA1	1		PSMC2	1
POLA2	1		PSMD1	1
PON3	1		PSMD4	1
PPA1	1		PSMD8	1
PPID	1		PSMG1	1
PPIL3	1		PTBP1	1
PPME1	1		PTBP2	1
PPP2R5D	1		PTGES2	1
PPT1	1		PTK2	1
PRAF2	1		PTPN1	1
PREB	1		PTPN12	1
PRIM1	1		PTPN2	1
PRIM2	1		PTPN23	1
PRKAB1	1		PUF60	1
PRKACA	1		PUSL1	1
PRKAR1B	1		PVR	1
PRKAR2A	1		PXN	1
PRMT7	1		QSOX2	1
PRPF31	1		RAB10	1
PRR11	1		RAB11FIP5	1
PRRC2B	1		RAB14	1
PRRC2C	1		RAB18	1
PRUNE1	1		RAB1A	1
PSMB3	1		RAB2A	1
PSMC2	1		RAB32	1
PSMD1	1		RAB3GAP1	1
PSMD4	1		RAB3GAP2	1
PSMD8	1		RAB3IP	1
PSMG1	1		RAB7A	1
PTBP1	1		RAB8A	1
PTBP2	1		RABGAP1	1
PTGES2	1		RACK1	1
PTK2	1		RAE1	1
PTPN1	1		RAI14	1
PTPN12	1		RALA	1
PTPN2	1		RANBP2	1
PTPN23	1		RANGAP1	1
PUF60	1		RAP1GDS1	1
PUSL1	1		RAPGEF2	1
PVR	1		RAPH1	1
PXN	1		RASA1	1
QSOX2	1		RASA3	1
RAB10	1		RBM28	1
RAB11FIP5	1		RBM3	1
RAB14	1		RBM41	1
RAB18	1		RBMX	1
RAB1A	1		RBMXL2	1
RAB2A	1		RBX1	1
RAB32	1		RCC1	1
RAB3GAP1	1		RDX	1
RAB3GAP2	1		REEP5	1
RAB3IP	1		REEP6	1
RAB7A	1		RETREG1	1
RAB8A	1		RETREG2	1
RABGAP1	1		RETREG3	1
RACK1	1		RFC2	1
RAE1	1		RHOA	1
RAI14	1		RIC8A	1
RALA	1		RILPL1	1
RANBP2	1		RINT1	1
RANGAP1	1		RIOK2	1
RAP1GDS1	1		RIPK1	1
RAPGEF2	1		RIPPLY3	1
RAPH1	1		RMDN2	1
RASA1	1		RNF128	1
RASA3	1		RNF213	1
RBM28	1		RNF41	1
RBM3	1		RO60	1
RBM41	1		RPAP3	1
RBMX	1		RPL0	1
RBMXL2	1		RPL10	1
RBX1	1		RPL10A	1
RCC1	1		RPL11	1
RDX	1		RPL12	1
REEP5	1		RPL13	1
REEP6	1		RPL14	1
RETREG1	1		RPL15	1
RETREG2	1		RPL17	1
RETREG3	1		RPL18A	1
RFC2	1		RPL21	1
RHOA	1		RPL22	1
RIC8A	1		RPL22L1	1
RILPL1	1		RPL23	1
RINT1	1		RPL23A	1
RIOK2	1		RPL24	1
RIPK1	1		RPL27	1
RIPPLY3	1		RPL27A	1
RMDN2	1		RPL3	1
RNF128	1		RPL30	1
RNF213	1		RPL31	1
RNF41	1		RPL35	1
RO60	1		RPL36	1
RPAP3	1		RPL4	1
RPL0	1		RPL5	1
RPL10	1		RPL7	1
RPL10A	1		RPL8	1
RPL11	1		RPL9	1
RPL12	1		RPLP1	1
RPL13	1		RPP38	1
RPL14	1		RPS10	1
RPL15	1		RPS11	1
RPL17	1		RPS12	1
RPL18A	1		RPS14	1
RPL21	1		RPS15	1
RPL22	1		RPS15A	1
RPL22L1	1		RPS16	1
RPL23	1		RPS18	1
RPL23A	1		RPS4	1
RPL24	1		RPS23	1
RPL27	1		RPS24	1
RPL27A	1		RPS25	1
RPL3	1		RPS26	1
RPL30	1		RPS27A	1
RPL31	1		RPS29	1
RPL35	1		RPS3	1
RPL36	1		RPS3A	1
RPL4	1		RPS5	1
RPL5	1		RPS6KA4	1
RPL7	1		RPS7	1
RPL8	1		RPS8	1
RPL9	1		RPSA	1
RPLP1	1		RRBP1	1
RPP38	1		RRM2	1
RPS10	1		RRP9	1
RPS11	1		RSL24D1	1
RPS12	1		RSRP1	1
RPS14	1		RTCB	1
RPS15	1		RTRAF	1
RPS15A	1		RUFY1	1
RPS16	1		S100A11	1
RPS18	1		SAAL1	1
RPS4	1		SACM1L	1
RPS23	1		SBF1	1
RPS24	1		SBNO1	1
RPS25	1		SCAP	1
RPS26	1		SCARB1	1
RPS27A	1		SCCPDH	1
RPS29	1		SCFD1	1
RPS3	1		SDF2	1
RPS3A	1		SEC13	1
RPS5	1		SEC22B	1
RPS6KA4	1		SEC23IP	1
RPS7	1		SEC24B	1
RPS8	1		SEC24D	1
RPSA	1		SEC63	1
RRBP1	1		SECISBP2	1
RRM2	1		SELENOS	1
RRP9	1		SEPSECS	1
RSL24D1	1		SETD3	1
RSRP1	1		SF1	1
RTCB	1		SFPQ	1
RTRAF	1		SFSWAP	1
RUFY1	1		SH3BP2	1
S100A11	1		SH3BP4	1
SAAL1	1		SH3GL1	1
SACM1L	1		SH3KBP1	1
SBF1	1		SH3PXD2B	1
SBNO1	1		SHQ1	1
SCAP	1		SIGMAR1	1
SCARB1	1		SIL1	1
SCCPDH	1		SIRT5	1
SCFD1	1		SLC25A21	1
SDF2	1		SLC27A2	1
SEC13	1		SLC30A6	1
SEC22B	1		SLC30A7	1
SEC23IP	1		SLC30A9	1
SEC24B	1		SLC44A2	1
SEC24D	1		SLC46A3	1
SEC63	1		SLC9A3R1	1
SECISBP2	1		SLFN9	1
SELENOS	1		SLK	1
SEPSECS	1		SLMAP	1
SETD3	1		SLU7	1
SF1	1		SMAD3	1
SFPQ	1		SMAP1	1
SFSWAP	1		SMARCB1	1
SFTPD	1		SMOX	1
SH3BP2	1		SNAP29	1
SH3BP4	1		SNCG	1
SH3GL1	1		SND1	1
SH3KBP1	1		SNIP1	1
SH3PXD2B	1		SNRNP48	1
SHQ1	1		SNRPD3	1
SIGMAR1	1		SNRPE	1
SIL1	1		SNX1	1
SIRT5	1		SNX13	1
SLC25A21	1		SNX2	1
SLC27A2	1		SNX5	1
SLC30A6	1		SNX6	1
SLC30A7	1		SNX9	1
SLC30A9	1		SPATS2	1
SLC44A2	1		SPEN	1
SLC46A3	1		SPTLC2	1
SLC9A3R1	1		SQSTM1	1
SLFN9	1		SRP19	1
SLK	1		SRP68	1
SLMAP	1		SRP72	1
SLU7	1		SRSF1	1
SMAD3	1		SRSF2	1
SMAP1	1		SRSF3	1
SMARCB1	1		SRSF4	1
SMOX	1		SRSF7	1
SNAP29	1		SSR3	1
SNCG	1		STAM2	1
SND1	1		STAT1	1
SNIP1	1		STAT4	1
SNRNP48	1		STAT5A	1
SNRPD3	1		STBD1	1
SNRPE	1		STC2	1
SNX1	1		STIM2	1
SNX13	1		STIP1	1
SNX2	1		STK10	1
SNX5	1		STK38	1
SNX6	1		STOM	1
SNX9	1		STRIP1	1
SPATS2	1		STRN3	1
SPEN	1		STRN4	1
SPTLC2	1		STT3B	1
SQSTM1	1		STX18	1
SRP19	1		STX5	1
SRP68	1		STXBP1	1
SRP72	1		STXBP3	1
SRSF1	1		SUGT1	1
SRSF2	1		SUN2	1
SRSF3	1		SURF4	1
SRSF4	1		SVIL	1
SRSF7	1		SWAP70	1
SSR3	1		SYAP1	1
STAM2	1		TAP1	1
STAT1	1		TAP2	1
STAT4	1		TAPT1	1
STAT5A	1		TARS1	1
STBD1	1		TARS2	1
STC2	1		TBC1D15	1
STIM2	1		TBC1D8	1
STIP1	1		TBC1D8B	1
STK10	1		TBCA	1
STK38	1		TBKBP1	1
STOM	1		TCF12	1
STRIP1	1		TDRD3	1
STRN3	1		TEX2	1
STRN4	1		TFEB	1
STT3B	1		TFRC	1
STX18	1		THADA	1
STX5	1		THAP11	1
STXBP1	1		THTPA	1
STXBP3	1		THUMPD3	1
SUGT1	1		TIMM10	1
SUN2	1		TIMM10B	1
SURF4	1		TIMM29	1
SVIL	1		TIMM50	1
SWAP70	1		TIMM8B	1
SYAP1	1		TIMM9	1
TAP1	1		TIPRL	1
TAP2	1		TJAP1	1
TAPT1	1		TJP1	1
TARS1	1		TLE1	1
TARS2	1		TLE3	1
TBC1D15	1		TLE5	1
TBC1D8	1		TLN1	1
TBC1D8B	1		TM2D3	1
TBCA	1		TMED5	1
TBKBP1	1		TMEM199	1
TCF12	1		TMEM209	1
TDRD3	1		TMEM39B	1
TEX2	1		TMEM97	1
TFEB	1		TMOD3	1
THADA	1		TMPO	1
THAP11	1		TNPO1	1
THTPA	1		TNPO3	1
THUMPD3	1		TNRC6B	1
TIMM10	1		TNS1	1
TIMM10B	1		TOMM70	1
TIMM29	1		TOR1A	1
TIMM50	1		TOR1AIP1	1
TIMM8B	1		TPSB2	1
TIMM9	1		TRAF2	1
TIPRL	1		TRAF6	1
TJAP1	1		TRIM46	1
TJP1	1		TRIM59	1
TLE1	1		TRIP4	1
TLE3	1		TRIP6	1
TLE5	1		TRMT1	1
TLN1	1		TRPV2	1
TM2D3	1		TTC37	1
TMED5	1		TTK	1
TMEM199	1		TUBGCP2	1
TMEM209	1		TUBGCP3	1
TMEM39B	1		TWF2	1
TMEM97	1		TXN	1
TMOD3	1		TXNL1	1
TMPO	1		TYSND1	1
TMPRSS11A	1		UBA2	1
TNPO1	1		UBB	1
TNPO3	1		UBC	1
TNRC6B	1		UBE2J1	1
TNS1	1		UBE3A	1
TOMM70	1		UBE4A	1
TOR1A	1		UBR1	1
TOR1AIP1	1		UBXN4	1
TPSB2	1		UGGT2	1
TRAF2	1		UGP2	1
TRAF6	1		UHRF1	1
TRIM46	1		URB1	1
TRIM59	1		USE1	1
TRIP4	1		USP13	1
TRIP6	1		USP15	1
TRMT1	1		USP28	1
TRPV2	1		USP4	1
TTC37	1		USP47	1
TTK	1		USP54	1
TUBGCP2	1		USP7	1
TUBGCP3	1		UTP20	1
TWF2	1		UTP3	1
TXN	1		VANGL1	1
TXNL1	1		VAPA	1
TYSND1	1		VAPB	1
UBA2	1		VASH1	1
UBB	1		VCPIP1	1
UBC	1		VDAC1	1
UBE2J1	1		VPS11	1
UBE3A	1		VPS39	1
UBE4A	1		VRK2	1
UBR1	1		WASHC2	1
UBXN4	1		WASHC4	1
UGGT2	1		WDR44	1
UGP2	1		WFS1	1
UHRF1	1		WIPI1	1
URB1	1		WIPI2	1
USE1	1		WWC2	1
USP13	1		WWOX	1
USP15	1		XDH	1
USP28	1		XPA	1
USP4	1		XPNPEP3	1
USP47	1		XPO1	1
USP54	1		YAE1	1
USP7	1		YAP1	1
UTP20	1		YBX3	1
UTP3	1		YIF1A	1
VANGL1	1		YKT6	1
VAPA	1		YTHDF1	1
VAPB	1		YTHDF3	1
VASH1	1		ZADH2	1
VCPIP1	1		ZC2HC1A	1
VDAC1	1		ZC3H15	1
VPS11	1		ZC3H18	1
VPS39	1		ZC3H7A	1
VRK2	1		ZCCHC3	1
WASHC2	1		ZFYVE1	1
WASHC4	1		ZNF318	1
WDR44	1		ZNF410	1
WFS1	1		ZNF443	1
WIPI1	1		ZNF503	1
WIPI2	1		ZYG11B	1
WWC2	1		ZYX	1
WWOX	1
XDH	1
XPA	1
XPNPEP3	1
XPO1	1
YAE1	1
YAP1	1
YBX3	1
YIF1A	1
YKT6	1
YTHDF1	1
YTHDF3	1
ZADH2	1
ZC2HC1A	1
ZC3H15	1
ZC3H18	1
ZC3H7A	1
ZCCHC3	1
ZDHHC5	1
ZFYVE1	1
ZNF318	1
ZNF410	1
ZNF443	1
ZNF503	1
ZYG11B	1
ZYX	1
